# Supplementary material for: Prolonged Disease Remission of the Chronic Immunological Skin Disorder Hidradenitis Suppurativa with Bacteriophage Therapy
Source: Research Square preprint supplement (doi:10.21203/rs.3.rs-5367237/v1), 2024-12-04
Supplement: Supplementary file 1 [file 178ef1b21a081c832f8add41.docx]

>1 length=131278 depth=1.00x circular=true

GTTGTATTTATCTAATGCATCATATTCAACAAGCTCTGTCATAACCGCTTCCTCAATTGCTAAAACTAATAATCTTTCAAGTTTAGTGTTTCCGTTTGCCATTTCTTTTACTGTGTTTTTCATAATTAATCAATCCTTTTCGTTTATTGTGTTTTCTTTATATTTATATATTACCATGTATTTTAGTAAGTGTCAACACTTTTCTTAAACTTTTTTAATAAGTTTTTTTAAGGTGTGTTGCTATCCCTTACATTTATTATATTACAATATAATCCAGTATATGTAAAGTATTTTATTAAAGAAATAATGGCAATTTTACACTAATTTGAAGCGGTTTGAAAACATAAAAAATAAGGGTTATTAGCCCTTATTTAATAAAGATGTTAATATTGTCTTGTAATCTGATAAACCAATCAATCAATGTAATTAATGTCGTACCACCTAATATAGTTACAATAGCATCCGTCTTTTGTGTTGAACGGTATTTCTTACCTTTGTATTTAAACTTAATCATGTTAATAATCCCCTTTTATTTTGTTTGTACATTGCAATATAGTTTATATTCCAAGTAATCTTCTTTTTTGATGTATTCATTGAAATCCCCTATAACATTTGTTAGGTTTATCCATGAGTTTGTTGCCTTACTAAAACCTCTTAGTGTTATTAATCCAGTAGGCAATTTGAATTGTTCTCTTTTTAATCCTAATTCTTTTCCTATGCTGTCTTTGATGTATTTAACATCTTTTTTAATTTCTGTTATTGTTGTTTTTGGTTTAGTTTCTATTTTAATATTCATGTGTATCAATCCTTTTCTGTTTGTTTGTTGTGTTCCTTACATCTATTATATTACACTATCTTAATGATAGTGTCAACACTTTTTTAAAACTTTTTTAAGTTTTTTTATTTGTTTGCTGTTCTTTGTTGTGTTCCTTTATAGTCTTCCTGCATTAATAAATAACTCTAACTGTTTGTTTAACTCATCCATAATAAAGCTATCAAGTTCATGAGCAGTAATATTATATTTCTTGTTTCCTGATGTCATTGAAACTACATTGTACACGTTATCAAATTTATTAAAGTAAATGCCATATTGTAATAAACACCAATCATTGACATAAATATCAGTAACATCTAAATCATTATGTTTGCTTGAAGCTTCGTTATATGTTCTAACAACTGTGTAATCTTGGTTTAGTTCCTCTAAAGTTTTATAGTTTTTCATAATTAATCAATCCTTTTCGTTTATTGTGTTTTCTTTATATTTATATATTACCATGTATTTTAGTAAGTGTCAACACTTTTCTTAAACTTTTTTAATAAGTTTTGTTTTATTATTATTAAGTGTTAGTTTAACGCATTTGTCTGTAACTGTAATTTCCTTTACACCATTATTATAAAGACTATGACAAGCTTTATTAATATGGTAGTATAAGTCATCACATTCATCAATACCTGACCATAATCTATAGTCATTTGATATTGTACCTTGTGCTTTAATTCTGTTATAAGTTCCTTTAATGTAATATAAATATTTCATATTATTTAACCTCCGTATAGTGTATTACAAGACTATAACCTTGCTTTGTTGGTTCGTGGTATGCTCGTGTGATAATTACGTTGTTTTCTCTCTCGAATTGTTCCATTTCATAGCCGTAGTTCTTATATGGTTTACTGTTAGTAATTAGTGTTTTCATAATTAATCAATTCCTTTTCTGTTTGTTTACTACATCTATTATATTACACTATCTTAATGATAGTGTCAACTATTATTTTAACTTTTTTTCTTTAATAATTTCTGCATTCTCATTCACTAGGTATAACGTATTATCTAGCTCTATAAATAAGTGTTTGTTCACTACCTTAACATTAATGTTAATTGGTAATCTATTTGAATGTGATACGCTAAAGACTTTCGTTTCTTTAAATAGTTCTAATGTTTCATAACTACCATCAATGTAAGCTAAATATTTAACTTGATAATGTGTTGAGTATTTTAAGTCATTTCTATAGTAGTTATTGCTTTTGTAACCATCTATATCTAATAATTCCATTAGTATATCTCCAATTTGATTTACGTTCATATCTTATCAATTCCTTTCGGTTTGTTTACTACGCTTATTACATTACACTATCCTAGATTTAATGTCAATAGGTTATACGAAAGTTTTTCAAAAGAAATGATTTCTTACTATTATATAGAAGAAACTAGAAAGTACAGATTAAATTAATTATTATAATCGATCGATTTAATTGTATACAATGCAGTGTAAAACTAACCATTTAATTTGATTAAAGGTATTGCATTTATATGTCAGTCTATTAAAAGAAATAATGATATAGAAACAATAAAAAAGTTAGAAAAAGAATTACAAGAATTATATAAAAGAGTTATAGATTAGGCTATTAACCTAATCTTTTTTTATGTTGTTTGAAGCGGTTAATATAAAGGGAAAACAGCGCCTGCTACTTAGGAAAATCATAGATTTATACTTATGATGTTTATAACAGTAAGAGAGCATTAAGCTTATAGGTCTATATTCAACGGTAATACTTTTTAGGTAGTATTTATCCTATAATACTTACTTGCTTATATAAGGTAGTTAAATAGGCAACACAAGCATATGAAAAAGCTAGAGTAAAACAACCCTAGCTACTTAATTTGATTCAAAATATCCTTAACAGCTTCTAATGTTAAATCTGATAACTTAATATTCTTATCACTATTAGTATCAATAATTACAGTATAGTTATCTACATCATACTGTATAACTTTAAGTACTGAATAAGTAACTAACTCGTATTCTGTATGTGTGTGATATTCTATCATTGCGTACCCTATACCTAATTCAGTTAAGATAGGTTCTAATGTTTTTCTTCTCTCCATAAAATCTTTAATAGTATATTGCATACCGTCTTTACTTAAAAATGCAGGCTCGTCATTGTAAATATAAAATAAATTCTCAATAAGTTCTAGTAAATCTTCTTCTGTTCCCTCACAAAGACTTACTGTATAAAGTAATTCATCGTATAATTTATCCTTTGCTTCTTGAATATTCATTGATATTCCTCCTTTATCCTATCCTAAGTGTATCATAAGTTTTAGGTAATGTAAAGTATTTTATTTTAACCAGTATCTAACTTATCCGCTTCATTAATCCAACCTTAATTTAATCCCTGATACTTATCTTTTATCATACATACCTGTAATAATTACTTGTCTGCAGAAAAGGTCTAAAGCTTTCATATTCAATATATTGTAGTAACAAAACATACTTAGCAACTTGTAACATAACTGTAATATTATTATAATGCTGTTGTAACTAAATTCTCATCTAATTCTCATAAACATATGTTATAATCTAAACAACAAGTAATTAGTTGTTAGTATTTTAATACGAATAACTTATTACAGGCGTTACCTTGTTGTAGCGTAGCGTAAAACAACAAGGTATACGCTGTTTTGTTCTTATCTTTTTAAAAAGATAAGTCGTACGGTTAGTACGAAATACAAATATATAAATAAGTAATAACAAATATTTATACATAACTAACAGATAAATATACAAATTATTAGATTAACTATGTTGAAACGGGCATACTATGCTCAAATTGATATACAATTATTAGCCAAGATTAAATACAACATAATTACTCAGAATATAAATATAATATAAAAAAGAAGCGGTTTAATACCGCTTCTACTTCTTCAATATGATATTATAAATACTGTTTATCTTCTTTAACTAACCTTAATAAAGCATACTCATTCTCAATGACACTATAACCCTATAAGATATCTTGTAATATTAATCTAGTCCCTACAGGTGTTAGTGTACATACTGATGTTCATTAAAGTCAGCCTCTCTATTATTTACCAAATCTTTCTTTAGCAATCTTTTTCATTTGTTCTTTACGCTCGTTACTTATTGGCTTTCTCAATGTAATTAAATCTTCATCCAATACAACTTTAACCAATACTGGTGTTTCATTTTCTAATTGTTCTAATACTTCCACCTTATCAGGGTACTTTTTCATAATATCAGTAATATAAGGTTTTCTACTTGCATAAATCACCCATTGTCCTTGATTATAGTTCATACTTACTTCTTGTTCTTCAAAACTATATCCTCTACTTACAACTTTAGTCATTCTAATACCCTCCTTTATATTTATTCTCAAGTATAACTTAACAAAATACTATTTTAATAACCTTTGTTTAAAGAATCTTACTACGTCTTCACCATAATATACAGATAAAAATACATTATCCCCTGTAACCCTAAAACCACTATCTATACATCTATTTTCGATGTAGTAGTCATTAACTTTTAATGTACTCATGTCCCCTAAAACTTCTATTTTATATCCTAACTGATTTAAATGTACATAAATATCTGATAAACTCATAATACAACTCCTCGTTACTAAGTCTTTATTGAAGCGGTTATTTAACCCCTCTATATACTAGTACTACACATAATAATACAAGTGATGTACATATATAAGTATACTGAATATTACTATATACCAAATCACAATACGTTACCATCTTTCCATATAGTAACTAACTCATTATCTACAACAGTACTAACAGATAGTAACCATGTATTTTTACCTTCGACATAGTAGTCAATAACTTCATTAATACTAATCCTATACCATACTGAGTTTAATACACTGTTACCTTGCTTATAAGTAACTACTATACTACTTAACTCAGTAGAAGCATCTATAACCGCTTCTACAATAAACTTAGTGTCATTAGGTATAGTAATAGTAATAGATTTATTAGGGTACAATGCATTATAAAACGATATATCATCAACAGTTATAACAACAATAAACTGACTATTAGTAGAATAGTACTGACCTTTACCTACATCACCTTTATAATACATATACATTAATTCTATAAACGAAACTTCTCTTTTAATCTTCATGATAAATCATCTCCTTTAACTTTATATACTTAGTATAAACCATAAGTAATATACTGTCAACACATATGTGTAAAATAGTTAAAATTTCTTTATTGTTCGGAAATTACTAAATATATTAAACTTTTACTCTAGGGAAAATTAAGTCAATACTACCATAGAAACAAACTATATATATATATTAAATAAGTAATGTTCAGAATTATAGTATACCATATACACAATATCTAATACTAAATATACCTTTATACACAGTAAATACTACTTCAGCTTAGTTTAACTATACATTAGAATAGTTTAGCATATAATCAGCATAGTTTAATACTACATAAGCATAGTTCACAGTAGTTAAAACTATATAAAAATAAATAGTTAGGTATCTAACAGTTAGATACCTAACTATTTATACACTATGAAGGTGGGAAGCAAAGAAATTCCTAGGTAACTGTTCTTACTTACTACTTGATACTTGATACTTACTACTTGATACTTGATACTTACTACTTACTACTTACTACTTGATACTTGATACTTACTACTTACTACTTACTACTTACTACTTGATACTTGATACTTGATACTTGCTACTTGATACTTGATACTTGATACTTGATACTTGATACTTGCTACTTAGTATATAGGTATACCATGTACCTGTTTTCTTTTAATTACTTACTAGCTATTACTTAGTATCTACTTATTTATCTATCTAGAAGATGTAAAGAAATTACTAGGTAACTGTTCTTACCTAACCTAAGTGATAGTGGTAGCTACTTTCTTTTAGTTACTTTCTTTTAGTTACTTACCTATTACTTAATATCTATTACTTACTATTAGAATATTTATTAATACTTAAGTTACTTAATAATTCTTTCTTCTTATTATTCATATCTTCAAACTGTTATACAGTATTTATTTACTTATCTATTTAGCTATTACTTATACACTACCTACTACCTACTGCTTATCTATGTGCTATCAATTATTGTTTTTTTATCTATTATTTATTTCCTTGATATATAGGTACTTATAATATCAGTTGTTTCTTTATGTGTTACTTATCTGATTTCTTTATCTACTTATATATATATATTGCTTTCTTTTACCTATTACTTACTTATATAACTTCTACCTACATCAATCTCTATACCTATTTGTTTGTCTGTTTGGTTGTTTACTCTTCTACACTTACCTATATACATGTCTATATCTTTTAATTACTTCTTTACTATCTATATTAGAGTATTTAAATGTTCTTTGTAGGTTACTTAATATATGTTTAAAGGTAGATTTTCTAGCATCAATCTCTATATATTGTATACTATTTTCTTTACAATATTCTCTCTTTTCTATGTCTGATAATTTTGTTTTCTGGTGGTTCATGTATCCACTGACTTCTTGGTAATGTTGAACACCGTGTACTTCTATAACGGTATTATACTTAGGTAAGAAAAAATCAAATCTTTTTTTACCTAATTCTTTAAATTTATATTCTCTAATATACTCTATGTTTGCAATATCTAAATAACTTTGTGTTAATCTTTCTCCGAAGCTAGAGTATTGTTTAGAGCATTGACAGCTATAGTTATCTTTAATTAAATCTGTAATTCTAATATCTTTTTTTCTTTTACAATTAGGGCAAATCGTTTCTATCTTTTTCTTAGTTGTATACTTATATTTAAATAAGTCTTTATATTTAGCATACTTATGAATATGTTTCTTATGGTATAACATCTTAGATTGAGGAATAGTACCATATGGTATATAGTTATCAGTTTTATATTTTAGTAAATTTTGTTTACTACTTTACCATAGACTTCTTCCTTTATGTTATATACATAAAGTTGTGTACCTAAATGAGTGTCTACTACTTTTAGTACTTCGCAATTTTTAATAATATCTCCTTGTTTTATATTATGAACAGTATAAGACTTCTGACCTTGGGTAATAAAGTTGAATTTAACCTTATAGACATTAGCTACTTGGGTAGCTTGGATTTTATTGTTGTAAGTTATTTCTACTCTAGATTCTTTTTTAGTTGGTGTAAGGTATTTAATATAGAGCTTACCTTTCGTGCTATGATACTCAAAGGGTATATAATGGTTTACATTTACCCAATCAATACGAGACTTCTTTTTAGGTAAGGAAGATAAGTCTATATAGCTTATAACACCTTGTTTTGTTTTTGAATAATATATGTCTTGTTCTTTCCAGTACTCCATAATAAGTGCTCCTCTTACTCTTTATTGAACCTGTTCTCCTGTATCTTGATTAAACACTTTAGCATTTGGGTTATGTGTTTCACCTTCTTGATACTCTGTACCCCATAATCTTTTACGTTCTTCACTAACGTCTTTATGCTCTCCGTTATTCTCAGGTACGTATGAAGTATGGTCATCTGCATCATTATTTTGAGACTCTTGGTTACTTTGTTCTACTTGCTCTTGGTTGTTAGGTTCTTGGTTACTTTGTTCTACTTGCTCTTGGTTTTTCAACACATTGATTATTGTTAGTACAATTAATACGGATAAAACTAAACTTAATATTTTTTTCATGATTAATGTCTCCTCTATAATTATTTAACTTATATACTTATTATAAACCTTACACTTATTCATGTCAACACTTATATATGAAATAAGTAGGATATTTTATCCTACTTATTACTTACTAAGAAATACTCATACTTAAATTATTATAGCTGGTTTTTAAAGAACTGATAAGCTAGTACAATGTTGGTACGCTCTTTATTATCTCCTTCATTCATTTCTAATCCTTTTTTTAGAAATTCTTCTAAATTTCCTTCCCAACATCCTACAAATACTTTATTATATTTAGGTAGGTACGTTACTTTATTTTTAAAACTACCAATATTATCTATAGAATACATTTCTAAACCTCTAATACCTTGAGTAGATGCTTGAGATAAGTTAGCACCTATTAAACCAGTATTTCTTAAATAAGAAAATCTTAAATCAGCATTTTGTAAATATGCACTTATTAAATTAATACCTGATAAGGAGGCATGCTTTAAGTCAGCCTCTATTAAAGTAGCATTTGTTAAATCACTATCTACTAAATTAGCACCTTTTAAGTTAGCTTCTGTTAAATGGGTATTTTTTAAATTAGACCTTATTAAATCAACAGAACTTAAATCTGCATATGCTAAGATAGCTTCTGTTAAATTAACTTCTATTAGTTTAGCACACGCTAAATCAGCATATCTTAAATCTGCTCCTGTTAAATCTACATAACTTAAATCAGCACCTATTAAGGTAGCTTCTCTTAAATCAACATCCTTTAAATCTAGGTCACGTAAGTCTGTAAAACTTAAATCTGCTCTTTTACCTTCTTCCTCATTGCTTTCTATCCATAATTTATGCTCTTCTAGAACTTTATTTAATTCTTCTTTTGTTATTGTTTTCATTATTCTCCTCCTCTATTAAAATAATCATCATTTCTCCATACATTAATAAAGGTACCATCGATTAAGATACTGACAGTTAATAATTCATCTCCGTATATTTCTATACAATCATTAATACTCACATTACCTGTGTTATCCATGAATAGTTCTTTTGCATGACTATTTAATAATACCCAGCAGTTTTCTAGTTTTGTGTCATTAGTAATTTCTTCTTCTACTATAAAACTAGCGTCCAAAGGTACTTGATATCCAATAGTCATACGGTTATTTTCTAACAGAAGGTAATAAGTATCTAAGCCATCGGATGTACCTGTGTAAGTACCTTCTTTTAAATAACCATTAAAGTATTTTTCTATTAATTCTTTACAAGTATATGTCTTTTGAATTATCATTATTCTCCCACCTTATAAAATTTATTTAAAATAAGATACAACTCTTTTAATGTCTCTCTTTTTTAATGCCTCTAGAAAAGTGTCATAATAGTACTTTGATAACTCTTTATCTCTTTCTAGTATACGTTTTAGCGTACTAATTGCTTTATTTCTACCTTGTTCAACTTCATTATAATAAATATCTGCCAAATATTCTCTATCTATGTTAATATCCCATTCTCTTTCAATAATATTTATAATTTTACCTAAATTTTTCATTATTCATACCCTTTTTTTAAAATACCACAGTATTATTATTCAATGTTTCCTCTACTATTTCCTGTATATCAATTGCTTTTTGCACATACCTGTTTGTTAGTAGTATATCATCTCTATATACCTTAACATTAGATACATCATCACTTACTACAAATTCGTATTTACTTGTTTTAGTAGCAGTAATTTTAAAATAAGGTTTAATATCTACCTTTAATTTATACCCATTAATAGTTCTTACTTCTTTTACCCAGTCATATAAATCAATTCTAACAAATCTACAGTAAGCTTCATACTTATCACAAAAATCTTCTAGTGTACTAAAGTCTTGTACATAACCATTCTTTGTAATTTTAGCAGTTAAGTCACCATAAATATATATTGTAATATAACCTAACACATATTCATTCCTACGATTAAGCAACTCATTTTTAAATGTATGCTTAGCTGTGACAGGTACTTTATTAAGTATATCTTTTAATTTATTTACTTCATCTTGTTTTAATAAGATACTCGACTCATATGTTACATTATTAATAATGTATTGGTATTTTGTATTAGAATCGTAGATGTATTCATACGTATCTTTATACACTACCTTTTTTAAGTACTTATCGTTAACATGTAAGATAATTTTGTCTTCATTACTAGAAGAGTCAATAATTACAGTAGAGACATTATATTCTTTCTTTATATTTTCAATTACCTCTTCTACTTTAGTTTGAATAATGTGTTCGGTAGGTGTTATATACTTTTCATAGTACTCAGAAGCCATGTCTTTAGTATATTGATTATAGTTAATATCTGAGTCTTCTTTACGTTTTTTTGCTTTGCTTAAATCTGGTATAACAATAATTAGTACACTTAGCAATATAATACCTAAAACAATTAAAAATGTAATCACCATACCTACCATTCCCCTTCCTCCTCTATATCTCTTTTTATTGCATATTCAATTAAATCTTCTTTGTCATAAGGTATCATATACCAACTACCATAACTATAAATCATTATACCTAGTTCAGTAAGTTCATAGTGTGTTCTATGCGATACGCATAAAAAGTCAGCACCTGACTCACCATCTACAGTATCTAACCAACAAATATATGGTAATCTATCCATAACATTAAGTATATGTTTATGTTCGTCTGAATTAAATTTTATCAAGTTCTTTCACTCCTTTAAAGAAATCGTAAGCTAATTTAATTTTCTTTGAGACTTCTTTTATTCTATCTTCTTCGTACTCAAGTGTAGGTTCTAGTTTACCAAACTCTTCAAGGGTATATTCATTATAATTACTAATAATTCTATCATAATCAGGTAAATAAGTTACATGCTCGTCAAAATCAAGTACATTACTTATAGTATAGATACTTATCCCAAACACGTCAAGCATGTTAGCATAATATAATGTTGTATTAGTTAGGTTTGTACCACCAAAATCTGCACCTTTTAAATTAGCCATACTTAAGTTAGCATTTTTCATGTTAGCCCACCTTGCGTCTGCCTCACTTACATTAGCTTCAGCTAAGCAGGCATTTTCTAAGTTTGCTTTTACTAAATTAGCCCACTCTAAGTTAGTATGATGCAACTCAATATCTTTCATTCGAGCATTTGTAAATCTCGTAGATATACACTCACTGTAACTTAAATCAGAATAACTTAAATCACAATAACTTAGGTTAGCATCACTTAAACTAGACATTACAATAGTTGAATATTGAAGGTCAGCGGAATGAAAGTCAAGATTTCTTAAATCTACACACTGTAAAAAAAGCTTTTCTCCTTCCTTTTCATTTGTAGCTAGCCATTGTTCATGCTTTTCTATCAATAAATCTAATTCAGGTTGTGTTATCCTTTTTAAGTCTTGCATTATTCCACGTCCTTTAATACAATTTGCTCTATATTAAATCTATTAAATCCATATACATAAGCTTTTAAATCGTCAATATCAATTTTACTTTTAGGTAAACAAATAACATCATAGTCTGCCTCAATAATTACTTTAGTACTTGTAACTGTTATAATTATTTCTTTATCTTGATTTATATAATCTTCAATTAAATCTTTTAAACACATTATTATCAGTCCTTTAATCTTTTATGAATGTCTTTTAATTCTACATAATACTTATGTGCTGTTTTCTTTACACCTTCTATACTATTTAATAGTAAAGATTTATTTCTTTCAAGTTCAACAATATTTTTGTTAATTATATCTTTTGTCTTAGGGTTTCTTGTTTTAATCATGCTGATATGTGCTTCATGGATACTAATATCTATTCTATCTAACTTAGTAAATAGAGGTGTAACAGTTCTTTTTAGCTTACCTTTAATATACGTATCTATTTGTTCTCTTGCTTCCTTTATGCCTTCCCAATTATCATCTTCAGTATCTATAACGGTAATAATAGTTAGATGCTTATCAATAATAATTCTATAATTTTTAAATACATATACTTCATTACCGCCTTTTTGTGTATGTTCAAAAGTAGCTTGCATTAAAGCACTAGCAAACCACTGACAAGCACGTTCTTTACTATCGTTACTAACTCTTAAGGTATAACGTTCATACGCGTGTTTAGTTAGGTTAATATGCTTACTTTTTATAGGTTTTCGTTGTTCTACAATGTTCATATTTAATCATCCTTGTATCTACTTACGCTAGCTTATGTTCTACTAGAATTTTATTTAGTTCTTCCTGTGTTATTGTTTTCATACTTATTCTCCTGTATCTTTTATTAATTTTATTGTAATCCTGCCTCTGCTCTTTCTTGTTGTGAACGTTGTAACCATTGTTCAAAACTTTCATTAGCTCCTGCATAGTTCCATGAGGCTCCTCCGCCTCCACCACCGCTAGCTTTATCCGCCTCAGTTCTATTCTCTAATTCTGCTTGTGCTCGTTGAGCTTCCCTATATTGATTATACTTGTCTGCATACTCAGCATTAGATAAACCATTATGTTCACTTCTACTTGCTTCTTGCATTTGTTCATTTTGTTGAGCTTGAGTCTTATCTTGTCCTTGTGTTTGGTTATCTTGTTGGTTATTTTGAACAGTGTTGTCTTCTTTAATTTGTTTATTCTCTTGTTCTTCTAATGAGGAAGTTTCATCTTTCTTATTTTCTTTCTTGTCTTCCTTATAATTGTGCGTCGGTGTATCTTCTTGTGAGTAGTAAGCACAACCTCCTAATAATAGTGTAGTGCTAAAGAATACTCCTGTTAAAATTTTATATAAGTTTTTCATATTTATCAATCTCCTTTTTCTTTGTTAAGTTAATTATACAACTTGTTATTTAGTAAGTCAACATTTATTTTTTCTTTTTTGTCATTTTATTTTGATATTCTTTTAATTGTGTTCTTTGTTCTGGTGTTAGCATGTTATACATCTCCTTTTAAAATTAATTCTAGATACTTAAATAATAAATCTAATGACTCAGTACTTTTTAAACTTTTCATATTAGTAAGTTCTAAACCTTTTTTAGTTCTTACATACACTTTTCTATTTGTAAAGTCTTTTATACTATAATCTACAAGACTAACCGATGTATTTAAGTTATGTTGTGTATTTAGATTATCACTAATCAATTCCAACGTCAAGCGTTTCTGTTTATTTAAATTTTTCATTTTTACTGTCCTCTCTGTAATTTATAATACGTATACATATCTTTACATACTAGTTTAGCAAAATAATTTATCATGTATTGTGCTGTCGTTTTTTTAATTCTATCATAATGAAAGTCAATAATAGGAGTTGCTACACTAAACCTACCTATATAATTACCGTTATCTCTAACTTCAAATACTAATGTATCTTCTTTCCAGTTAATAATCTTAAATGTTTCTGTGGTACTTAATTCTTTTGGAAAAGACCACCACTCTTTGTAAGTTGCTAATATTTCTATAGCATTAGATAGCTGTCTATGAACTTTTTCTTTACACATAAAAAATCACCTCTAACGTTTTGTTACTCTTAGTATAAAGCAACATGTTAAAGGTGTCAACACTTATTTTTGATTTTCTAAATCTTTATTTGATTCTGATATTGTAAACTGTAAACTTTTTGCTAAATGACCAAGTGCAATACGTTCAGGCACTTTTAAACCTACCTTATCAAAATAGGTGTATACTAACCCTTCTTCAACAATTAACATAATAATACCATCTACAACACATAAGTACTTATTTTCTTTTGTAACTAGTTTTACTTCCTTATTTAATAAATTACTTGCTAATTCTTGAATACTAACCAAGATACTATGTGTAATATGGATTAAATTTCTATATTTTTCTGTATACATACTAACCACCCTTTAGAATATAATATTTGTTATGCCTTTATTATATAAATCTTTAGTAAACTTGTCAAGCGCAATACGTGCTACTTTTAATTCTTGCATAAAACTTTCTACTTCACTAGCATTTACATATGTACATGGTATTTTTAATTCCAAGAGTAACTTTTCTGTAGTATACCCTATAATTTCAGGGGTATATTTGTTTACTGATTTTTTAAAAGATGATACTTCATACTTACCTTCATTATCTATGACACAAATATAATATCCTCTACATTCATTCTCATATACTACTTCCATTTAGTAACCTCCTATCAAATATTTTATCATTATATAACTAAGTATAAAAGGTACTAATACTAGAGTAGCCCAAACTAACGTAATAATAACTTGATGAATCAAATAAGGTAATAAACCTTTAACCCATCCCTTACGAACATAATACTTAATAACTATATCAGATATTAAAGAAGTTAATTTCCAGACTTCCCATAAGTACCAAATAAATACACCTACATAAAACAATAAAATAAAACCTAACATGAGTTTATCTACTATATCCATTTATACCACCTACCTATATCCTTGTGTAGCAAGGTCTACAATTTTATGTTGCAAGAACTTGTAATTATCTTTAAATCTTTTTAATTCATCTTTACCAAATGTATGTTTAATTTCTTTCTTAACTGTCCATGTAGTTTTACCCTCTAATACTTTACTTAGTACATCTAAACCAATTGGAATTACACGCTCATCAGGTAAAACACCATTCTTAATACTTACGACCACAATATACAAATTATCTAAATCACTTTTTTTCATCATTTATCATCTCCTTATATTTAAACTATAACATAGCATAAAAAAAGAGTCAAGTATAAACTTGACTCAATCCTTGTTAAATAAATAGTATATAATAGCAATACATACTAGTATAATTACTACGGTCATAGACTATCATACCTTTACTTTTTATTTAATACTGCCTCAAACCTATATTTGTGTACTGGATTATTGTCATTATCCTCTGTGTATACACGAATAAGTTTAAAGTTTACACCTTCTCTAAATTTACTAGTCCTATAATATCTCATATCAATACTTTTATCACTTGTTCTTCCTGGTAAATAGGTAGGTAGTTTTTCCATAAAGTATGCTTTGTTGTCTATTACTTTCTTAAGTGTATAGTCCCCTACATACTCTACATTCTTATCTTTTTTTAGTTTACCGTGGTGTGTTAATTGGTCTGTAACTTGTGATTTGGTTTTTTCATGATATAAGTATGAGGATACGTAATAAGTAGATATAGATAAAGCTAACATAACTAAGATAATTACATAAGCAATTATTGCTTTTTTACTCATAGCGCACCATCCTTTACTACTTATAATATAATAACTTAGTCTATAACTTTAATACATTTTAACAGTAAAGGACAATATATCATTCTATTGTCTCTGACAAGTTCTTTTAGTTTAAGAAAATGTTTTAAATAATAGTCAGGATTTTTTAACTCATAATACTTTAGTAGTGCTTCTTCTATACTACTATCAAAGTAATACTTATCAACAATTTCTAAATGTGTAATAAGATTATTTGACATTAAACTTAATTTATCTTTAATCTTTACATCACTAATACTTGTACCTACTTTAATATCATTAATCATATCAGCCTGGGTATAATCTATATCAGTATTTTCTATCTTAATTAGTGGTTGCATAACATGCGCTTTCTCATATACACTTCTAGGAACTTGACCTATTAAATGGTCAAAAGCAGGGTCTTCAGATACATACCCAACATCTATACCTATATACTGACCACTTTCTACATGGTCGGAGTTATAATCTTCTGGTATTGTACATAGGTATAAATTACTTTCATTAATCTCTTTACTAGAAGTATCAAAATCAGGTACTAAGTCTTGTAGAGATTCTTTATTAAATAAACTATTTTCTATTCCTTGTATAGTTAAATTATTATCAATGTTCTTTACATTATACAAGTAATCTACAATTCGTTCTTTGCGCATATGACACCTCTTATTCTACCTCGATAGTATCTTCTAAGGCTTTCTCTTTTAAATCTGATTTTCTTTCAATATTATATAAATCTAAAATATAGTATAAACCATTCTTGTGAATGTTATACTTTTTATAGATACTTTGTAAGTCCATATATTGATAATCTTTAATTAAGGCTTGTACTTTATTCTTATCATTAGTAATATGCTTTACACGTTTTGCTACTCTAGATTTCTTATGTTTCTTAGGTACTTTATAGAAGTTTAACACTGTATAAATCAAACCCATACTTACTTTAGCTTCTTTGGCAATATCAGTTACAGGTACACCTTTATTATAACTTGTAACAATATATTCTTCTTTTGGTGTATTGAACTCTTTATTCTTACTTAATGGCGTATAGTTGCTTTTATTTTCTAATAATGCTTTCTCTTCTTCATTTAATGTAATAATCATAATCAATTGCTCCTTTTATTGTTTGTAATAAAAGAATAACACACCCATATGAGTGTGTCAATCATTAACTTTTAATTTTATTAAGTTTATCTTCATTATATAAAGATGTTTCTCCTGAAAGTGCATAGAAATAATTACCGTTACTATCTACTAAAATATCTTTAACCTTAGCTACATCTGATTCTTGATTATCTCTTACATATTCTACAATTGTGTTCTTAGGGAACTTAACTTTTGTAGATTCTACATAATCGTCTTCTAAATAAACATCAAAAGTTAGTAAAGAATTAATAGATACATTGTATAGTACCCAATACCTTTTATAGAACATGGTTTCTTTATCTAAGTCTCTTGACACTTCAGTAAACTTATGTTTTCCAGTACTTAGTCTAAGTAATATATCTCCTTGGTTCTCTTGTTTAACTCTAAGTACATCACCTTTATATAGGTGTGTTATAATATCTACTATATCTGTAAGTGGTTTAACATCTTTTATTGGAATTAAACTAATTTCTTCTGTCATATGTATTACCTCATTATCTATATTGTATAGCCTACTCTATCTAATGTATCTTTTAACTTTCTTCCTTCTTCATCTAAATCTAAGTTTTTATAGAACTCTTCTTGTAGTTGCTCCATTCTTTGAAGAACTTCTTCATGTTTATCTTCAGGAATAAACTCAAGCATAACTTCTGTCATAGCAGTATCTTGTGCTTGTTGTTTAATCATTAGTTCTCTTAGTCCTATGAATGACATACCTTTTAGTTGGTTACCCGTAATTCTATCTTTTGTTTCCATAGCTTTAATCATTAAAGCAGGGTCTAATGTTTCTACAAAGTTTAAACCTTTAGCACCTTTTTGAATAATCATATCTAGTATTTGAATATCATCATATATTGTTTGTACATTCTGTGTAGCCAGTTCAAAAGGTGTATAATTCTCACTATCTAATTCTTTCATAGGATTTTCTTTTTTCTGTATTTGAGTAGCGCTAACTTTCTTTCTTTTATCAATAAGTTCCCCTAAATCCCATCCATTTTCAATAGCTTCTTTACGTTTACTCTTATATCTTGTAATGGCAGATTTGGATAACTCTAAGTCATACTCTTTACATAGGTCTATAATATCATCATAACTAACATCTTCATCTATAGCATTATCCACTTTAGACCTTAATAGTTTATTATTATATAGTTTAGATAGAATACTTTCCTTATCTGGAACTACCTTTATATCAGATTTTTTATTTCTTAAATTCTTTTTTCTAGCCATTATATATTCCCTTCTTGTCTCAAGTGTCTTTACATATGTGTGAACTAAAATAAGGAGTATGTGTATTCACATAACCTTATCAAATCAACTGTTTTATACTTTACACTATATAATATATCACAATTTCTGCATCTATTTTATTTTCATAAAGGATATTCTAATTTTTTACACTATAGTGTAACTATTTTAAGCAATATAAATCTTTTTTCTAAAACCCTATACCTAAAAGGTATTTTAATGTTTTATAAATATAATTTTAAAATAAGAATAATACCTTTTAGAAATTAACTAACTACTTGAAAAAAATATGTATAAAAAATCCCTTATATACGTATATTTATACCTTAGTATACATATTTAAGGGAGTATTATACTATAAGAGAATTGTTAGCTCATCATTACCAACAAGATTAACAATCATTTTATAGTTATTATCACTAACTTTCTCTACTTTACTACTAACAATATCTTTATATCTAACTTTTACATAGGATTGACCACAAGCAATAATTAAGTCTTTATCATCATCTAAAAAGAAAATACCGGTCTCATGTGTATTATATAAACTATAATGATATTTATTCGTATCTAACTTAACAGAAAACACACTTCTATTGATTAAATTATTACCCTTGAAGAATGTAAGAACTTTTAGAGTATCTAATTTGTTTAATGTACCTTGGTTACATAATGTACCTATGAATGATTGACCGTCATATTGCTTATCAGTTACTAGTAAGTATACAACATGTGTGTAATCATTTAAAGGGGATACATCTTCGATAGTGTATAATCTAAGTTTTAATTCTTTATTAATAGTAGTATCTTGGTACATAATAGTAGGTTCAATAAAAGTTGATACAATGTCTACTTTCTTTGTTGAAGTTAATTCTGTTCCTTTAGATAATAAATCTGTCATTAATCCAGTATTTTCTAATCTTTTATTTAACTGCTCTGTTTTAACATAACCTAGTCCTGAATCACTTATCATATTATTCATACCTACAATAGCAGGTTTTAAGTTCTCAGTAACTATTACTTTATTCGTAAATTCTATACCATCTTCTACTTGTGATATGTCCTCTAAATAAGGTATTATTGTTACACCGCTAGGGAAATAATCACTATCATAGGACACTCCTAATAGTGTAATATCTTTACTTTGTAGTTTCTTAAATAAAGTACTTATATTTGTTTTTTTAGCTTTTGTTCTTAAATATTTAACCATTATTTACCACCTTTATATATCATTTTCTTTGGTGTTCTTTTCTTATCTAATCTACTATTTTTGCGTATAGATATTCTATGTCTAGTACTAAAAATGTAGATTAAATGTGTACCTCTAAATGTACGTTGTTCACGAATACTACATTTACCTATTAATTTCTTACCTCTATAAACATAATAAACTCTATCCGTATGTAAAATAGTTTGTGTTAATTTACCTTTTTGCTTCATTACAAGATATTTCTTCTTTATATTCACAGCTTCACTAATTAAGTCTAACGCATACTTCTTTTGTATTTTAATGTCTGTAGCAGTAATATTATCAAACCTTTTAACAAACAAAGGTTTGTATTTAACAACAATACTTTCATCTGATATATCTTTTCTTTTTTTATTAAAAAAAGAAGTACTTCTACCTGATAAGTTACCCGTAGGAGCAAAGTTAACAGGTTGATGTTTATATCCGTTAGATTTAGGTTTAAATGTATCAGGTTTCCTCTTTGCCATATAATACCCTCACTCCGTTCTGTATAACTTTAAAGAAATCATCTTCTAATATCTGCCATCTATTACTGTAACCATAGATAACACCTCTAGTAAATATCTTATAAGAGTTCTCTACACCTAAGTAATGAATAACTTGGTTAATAATAGCTGACTTTTTCATTCTCATACGTTGGGTTCCCTCTGTATAACTACCCTCATTGTTAGTATTTTTACCGTGCTCCCTATAGTTATATCCAGTTAGGTATGTATTATAATCTCTTAACTGTTTAAGTATAGTCATTAAATGTTGCTTCCATAAAATATTTAGTGTATGATAAGGACTTCTTAGTGGTGAAGGCGTAGCTTCCTTATACTTACCTACTACTGGACTGCCTTTAAAGTTAATATAGCTCATAATACCTACATGATGGTGTTTATACCTTTTTAGTATTTGCTCTACTTTAGGTACATGCTTATCATGACACATCACATAAACATACTTACATACTAGACTATAATAGTATAACTGTTTATTAAGTCTTTGTGTAGAGTCTCGTTCTGTCTTTATCTCTATACCCATAACAGTACCATTTCTATCAAGAATTAAACAGTCAGTTCTACATTTACCTTGACAAATAGCTTTTTCATTAAATATTCTAATATCTTGTATATTACTTGTTATCTCATCATCTTTAAACATGTGTCTCTTCGTTCTAATTAAATCTTTAATATCCTGCTCATAGAATTTAGTTATCTCAGACATTTATTCTATCCCCTTTAATACGTTGATAATATTGTAATATACTATCTAAAGGTGTATAAGACTTAATCCATTTAACATTAGATAAACATATAAATACTCCTGTATACTCACCATGTATAACTTTAGTGCCTTCTTTTTGTGTAATAGTTACTCTATCTTTTTCTCTTTCGAAAAACCCTTTACCTACAGAACCTGTAGTTGTATCTGTACCTAAAGGTATAATATTAGCTAAAAAGATAGGAGGTTCATATACTTTTTTATACTTCTTATTATTAGGTAGCATTGACTTAATTGTATTACTTAATATCGTACCACCTCTAATAGTTTTACTTACTGTTTCTATTTTATATTTCTTTTGTGGTACCTCATCATCAACACTATGTATGTTATATACTAATACATACTCAGAAGTTTCATCTTGGACATGTTCTATGTAGTAATAAGGAACACCTCTAAAAGAGTAAACACCTTCACTTACTTTTGTCTTAATAATTTCATTATCAAATTTACCAAAATTTAATTGCAACAAAAATCACCTCATATCTAATATACCATAAATAACAAAGAGAGTCAAGTATAAACCAGACTCCCTTCTTTACTATTCTTTATTTTTTGTTACGAAACTCAATACTAATAATACTAACGCTGTTAACAATACATCTATTACAATAAGCGCAATAATAGCAAAAAGAACTTCTAACCTTGTTGTAATTTTATAAATCGAATCTCCAAAATAAACAACAATACCTAAGAGGATAATACCACATAAATTAGGTAATAACACATTATAGTACTGCCAATTGGGTAGAGGGTTACCTCCTTTTTTTACTAATTCACGCTCACCACGTAACATACCTACAAAGTTCATTGTGGTATTAACAATAATAATGATAAGCAATGTTAAGGCTATAATTGATAGAATGTCCATATTATCTCTCCCTAATCTAAGAATACAGTTTTAATGTCAATGTCTTTATTTTTTTTATTTAAAAATAGTAGTTGTTGTGATGGTTTTGTTCTAGATAGATGTAGTTCTTTAGCATAATTATTATATCCCATAGGACTACTTGCTACAATATGCATTCTATTGTAATCTTCTTGTGTTACTGAGAAGTGGTGTACATGACCTGTAATTAACAAATCAATGTGAGTGTTCTCAATAAATTTAGGAATATGCTTACCTTTACCTTTAAGTCCATCTCCATGGTTTATAATAATATTTAAGTTACATACTGTGTCTTTAATAGTATATACATCTTTTCTATTGTCGATAATCTCAATACCTTCTAATACACCGTTTTCTTTTAACAGCAGTAAAGAATCCAATACAATATAAGCTACACTATCATTGTATACTTTTTGGTTCTTATTACCCTGTACACGGTCGTGGTTACCTGCTATCATACCGAAACGTAAATTACCCCATACATATGGAGATAATTCTGTTAAGAAGTCGATTAATAGTCTAGTTCCTTTTGCTACCTGCTCTGCCATAGTGAACTCAGTATCAAAAGCTTGGTTAACATCTCTCATATTAATATGCTCTATTAAATCACCTACAAAGTATACTGTAACATTACTAATACCACGTTTACTAATATCCTTAATAGTTTCCTGTAGTAGCTGATTTAATCTTCTTTTTAGTACCTCAAAGTTATACTCATTAGTTAAATCTTGAAAAGCACAACCTACATGGAAGTCCGACAGTAAGATAACCAGCTCTTCTTCTTCCTCAGTAGAAGTATACTTACTTACTTTATGGTCTAGTAACTTATTCCCTTTTAGCTCATTAACCATAGTACGCTTTAATTCATCAAACAAAATAGTAGGGTATGCAGTTTGTCTATTAATCTTTCGTAATTCCCTTAGTCTAGATAGTTCTTTTTCATGTGCTACTACATAAGATGACACTTCTTGATGATAGTCATTACCCTCAAATACTTGTTTATCTTCTACATCTCTTAAGTCTTCTAATAACACTTCACCTTTAACAGCTTTATTCTTTAGTTGGTTAAGGTACTCATCACTTCTAATATTTTCTACAATGTCTTTTAACTCATTACGGTTTACTCTATCAATACCAAAACTTGTTAGAATCTTATTAAATTTAGATGTAACTACCTTACCTTCATCTTTAAATAAAATACCTACAATAATTGCTTGTAACTCTTCTATTGTTTTATAATTACTCATAAATACATCCTTCCGTTATTAAATACTTGTTCATATTCTCACCTAATACACTAATATGACTATCAATAAAGATACTAAATATATTAGAATTTTCATTATAGGATGCTCCAAACGTTTTAGCAACACTACTGACATCATACCCTTTTACATAGAAAGTAAGGATATCACTAGTACCTCTTGTTTGTGAACCTATAACAACAATACCTTTTTCTTTATCCTTAAGGCATTCATATGCTAAAGGTAATTTATACTCAGGTGCTACTTCATATAGTACATACAAATCATTTACGTTGTAAAACTTGTCAGTCATAATAGGTAATACTATATCTACAGGGTAACCTACTAGACCCTTTTCTTTTGCCTCCTCATAAGTAGATTTAAAGCTAAACAACTCAGTGTACTTGTGAGCAATGTCTTTTGTATAACTACTGAAATTAATATTTAAACCTTTGTCATCTAGAACCACAAGTTGCTCTAATAAGGATAGGTATTTTAAATCATCACCTACGGTAATAAAATCTTTGTTATCGGGTAAGTTAATATTAGAAACAAAGTATAATTTTGTATCCTTTAATAATTCTTTATACTTTAAGTAATCCTCATTATTGTATATAAAACCTAAAAAAATAACAGAATCATACGTATTATCACTAGCTAAATGTAATGCCGAGTCAAAAGATACTACACTTTCAACGTCGAACATATCTATACCTTCGGATAAATGTTCTGTGTGTGAAGCTACTTCATTTAAAATAAATAACATCAATCCTCAATCCTTTCTATTAAATACCCTACCTTTTCATTTTCCTTATCATTATTAGATAATCCATACTCAACAATTTTATACCTATACATATGCACTAGGTCTTTAATAACATTAATAACCATAATGATATTGACCTTACTTACTGATTTATTATCATACGCAACTGCAATATACTTTTCCTTATCTTCCATTAATTTTTTAACTTTCAAATGGTCGTTATCTGAAGTTAAGTGTACTGTTTTAATATCCATATAGTACCTCCTTTATTAATTCTTGTTTAACTATAGCATATAAATAAATATAAGTCAATAAAAAAAAGCCCAACAATTAAGTTGGACTTTAATTTATTATAGCTCACTATGTGGTGCTGTCTTAAATTCAGGTACATCTACCTTTTCTGATTCACCAGACTCATTAGAGTATGCTACTTTATAAGTTCCTTTAGGATACGTAGTATCTGCTGTTAAACCACTAATAGAAATAGTTGTTTTACCTGTTTGTTCAGCAGTCTTAGTACCTACTACTTCACCATCTTTATATACTTTTAATGTTTTTTCCATTTATTTTTACCTCCGATTATGCTGTAATATCAGCTGTTGTTTCTTTAGGGTCTACAGTTACATTTGTAGGAGCTTCAGGTACTTTATCTTTAACAACTACAGTTACAGTATCTGTATGATTACCATCATCAGTTGTAACAGTGATTGTAGTCTGACCTTTTGCTTTAGCTTCTACTAAACCTTTACTTGATACACTAGCAATATCATCATGTTCTGAAGTAAATGTATAAGTAGCTTTTGTTGCGTTACTAGGTTCAATCGTAGCTACTAAATTATGTGTTTCTCCTACTTTTAAATCTAGTGTTTCTACATCTAAAGTAACGGATACTACTTTAATGTCCTTAGTCTTAAACGCAGGAACATCTACTTTTTCTGATTCTCCTGATTCATTAGAGAAAGATACTTTATATGTACCTTGTGGGTAGTCTGTGTTAGCAGTTAAGTTATCAATTGTAATTGATGTTTTACCTGCTTGTTTCTCTTCACTTTTTAATAGCTGGTCACCTTTATATAAATTTAATTTATCCAAACTAAGTCATCCTTTATATAATTATTCAGCTGTAATATCAGCTGTTGTTTCTTTAGCTGTTACTGTTACATTTTTAGGTACTGACGGTTCTGAAGTATCTCCTTGACCTTCTCCTGAGTCTACTCCTTTAACGTCTTTACGTAGTGGACTAGCAGGAAACTCAGCGCTCACGTCTTCATGAGGTTTCTCATTACTATCTACTACTTTTTTAGCATCTTTACTTTCAGCATCAACTAAAGCAAAAACATCCCTCTTGTTATTAGCAAGGAATACATTGTATACTCCAAAGCTGAAACGGTCTTCAACGAATGCTAAAAACGCTTGAATTAATTGTTTACCTTTATCTTTACCTTTAATATTTTCAGTTCTAATAAAAGCATGGTTGTAAGGGTCTTTAACAGTATTAACTACAAAATGAATTTGGTCTCCATCTGTATAAGCAACAGGAGCCTTTTTCATAATTTTAATATTTCCTCTACCATCTGTTTCAATCGGGTATAAGAATAATTCTCCCTTATTATCTACTACTTTGTAGTTATACTGACCACGGTGTGTACGTGTATAACCATCTTGCTCTACTTGAACTTGTAAATACTTATCTGCTACAGTAGCGGTATCTTGTTTTAATACTTCATTAATATTTTTCTTAGCCATAATAATTAATCTCCAATCATTATTTTTTACATTATAACATAGAAAAAACCTCCCTATGTTATTATTTTCATTAATAATATAACAAAAGGAAGGCTTGTTTGTGTTATTCCCATACATGATTTTGTGTATCTATTTTGTTGTCTCTAATGTATCTTCTACTGTTTTGTTCGTGATAAGCATTTATTTTAAATTTAACATAATCTTTAAGTTCTGTAAGCTCTCTAGATACTTCTGAACGTTCTACATCTAACCTATTAGCTACAGTAGACACAATAAATGCGTTGTCTTCTTTATCCGTATTAATAAGGAGCTCTTTTAGCAGTTCACTTTGTACTTCAGTAAATTGTGTATCATCAAAGACATAATTAAGTAATTCATTTTCTTCTAATCCCACATTTAACTCCTGTGTTAAGGACTCTACTGTATAATCTGTTTTACCTACAAGTTCAGTACGTTTATATTTATTGTTCTTCTTAACATAACTGTTCTGTACTCGTAGTGTTAGTTTAGTTTTAATATACCCTGGAAAATCTACTTTACTTTGTATATCATACTCCTTAACTAACTTAATAAACTGCTCATCTATGTATTCCCGTAGCTCTTGTTTCTCAAAGTCATGACTCATACCTCTAGAGTACCTATGAAATAATGACCATCTAAGGTTTTTATATCTCTTTAAAAGCATGTCTAAGTCTCTACCAAAGTCAATAGGAATACCATCTAAGTCTATAATATATCTATTCCCATTATTAACTTTCTTCATAAGGATGTGCTCCCTCAAATACAATCTTAATCCTGTGTACATCATTTGATACATAGATATCGGAATAATGTATTGTTTTAGGTACTTTGACTTCAGAACTATTATAACGTACTAAAGAGTAACCTCCTGCCCATCTTGACTCTACATGCTCAATATACATAACTGTAGAATCAGTGTAAGGAAATCCCGACTCTTCTACAATGATAGGCTCCTTATTATCTCTAGCTTTTTTAAAACGTTCTGCTATTTCAATATAAGGTAAGGGCAATACATCATTTGTATTAGCCCTACCTAATGCTTCTTTAACACTATTAATATTTCTATCTATTAGATTATTCATTTACATCTTCCTTAGTCTCTTTATTAGTAGAGCTAAGCTCTTCGTAGTAATCTTGTAATGCTTTAAACTCTTCTAATTGAGTAGTGTCTACTTTTGTATTGTTTAAAGGTGCATACTTATGAGGGAAATTCTCGTGGTAAACTCTACTAAATAATTCTAAGTATAATTCATGGTTGTCCATTAATGTCGGTACCCAATCTTTATCATATTTTTTAATTTCTTCACCATTTAACGTAACATAATTACGCCATGTTCCTTTAGTAATTAAACCACGCTCAACGGCTTCTTTATAGATAGTATGATAAGGGTCAACACCGTTTAATTGAATAGTATCTTCATCAGAACCTACTTCATAACCTGATAATAAATCAACTTCCGCTTTTTGACCAGGTCTAGATAGCTTAGACTTCTTAGTTTCAATACGCATAACATGACCTTTATACGTAGGTTTACCTGTCATAGCATCATTCTGTTTTAATTCTGATTCTTTACCTTTAGATACTTTAATACGTAAACTAGCACCATGTTCAAAAGCTCTTCCTCCTGTAGACTTAATAGGGTCATCATAAGGATTACTCATATTTAAATTATCACGTGCTTGGTTAATAACAATTAATCCTGTATTTGTATCATTAAGCTTAGGTGAAATAGCATTTACTACTTTTTGTGTACTTGTCGCTTTCGTTCCAAGTTTTTTATGGTCTACTCCTGCATCAATTTCATCTTGTGTGCGTGTAGCTCCTAGGGAATCCCAAATGAACAAAATAGGTACGCCTGGTGCTTTCTCATTAAATGTATCAATCCAGTATTCTAACTCTTTACCTACGGTTTCTACTGATAGTTCAGTAACATTTTTAAGTCTACCTTCACCTGACTGTATTGAGAACAATTTAGATACGTCTACACCTAACTGTTCCATACGTTGGTTATCCGCTGTTCCTTCAATGTCAATCCAAACTGTAATAACTCCTAATTGTGTTGCTACTCTAGATAAGTGTACTGCAAAGGTCGATTTCAGTTACTACCCCTAGTTTCCTAGTACTTTAACACTAACTTAATAGTGGGCTTAGACTATATCTTTAATTGCTTGGTCTGCAAGTTTTTGTTTTCGGTCTATATGAATATTATTATCTCGATATAATGTTTTCATTAATTTTTTAGCTTTTTTACCTGTATAACCTATTCTATAAGAGGTAGAAGTTTTAGATATTGTAGGACATTTAAAACCTAATAAGTCTTCAATCCAACTACCTACTTCTTTTAAAAATTCAGGATGATTGTTAACTAAAGTTATTGACCATCTATTATTATTATTATTATTATAACATCCAATAGAACCATCACCATCAAACAATCCTCTTAAGTAATGTTTCCTTAAATCATAAGGTATGTCTTGTGTTAACCAATCTGTTTTTTTAGTTTTCATAGGTATTATACCATATTTAGCTAAATCATTACATAGTTTTTCATCGGTAACACTAAAAGTATACGTAGAATTTTCATTTTTTATATAATCTCTTTTTCTATGAGATTCATAAATTTTACTGTCTGAATTCAATTCTTTTTGAACTCTTTCTACTATTTCTTTATCAATTAACTCTAGTGTTAAGTAACATTGACCTTCTCTTCTATATCTAACACAACCGTCAGCCATCAATAAACCTAAAATATATGCTTTCTCTTCAGTATCAATTACTTCAAAGAAATCTTTATTAATATTTCTATTAACTCTCCTAGGTTGATAGTAAGATGTATCAATACCAAAGTCTCTTAATATTTTACTTATCTCTCTTGCATGTGTTGTATAGACTGCTTTTATCTCTGCAATAGACATAGACTCTTCAGTGTACATTCTTAAAATATCTTGTTTTTGTTTACTAGTCCATCTTCTCTTGCTATTTGTGTCAATATTAAACTCATCTAATACTTTTTTAATTGTAAAGTAATGTGCATTATACTTTTTTTGTATCTCACTAAATTTCTTACCTTCTTGAAAGGATTTCACTATATCTTGTTTTTCTTCATTAGACCATACTCGTTTTACCATATTATACTACTCTCCATTTTAAATAGATTTCGTAGGCAATTCCCACGTACTTCGGTTTCCCTACTCTACTCAGTTACTCACTAATACTTCTCAATATTAGCTACCTTTTCGATAGTCGTTGAACCTTCTCCATTTTACAGGAGCTTGGATGCTGATTACCTACACTATATAATATAACAGTTTAATAACTCGTTATACCATATAACTCATATACTTGTTATTTTTAACATTCACGCTTACCGTTTCCAGTTACGTTGTAGTTAACAAGTCTTTAAGGCTTCCCAGCAATTCACGTGGATTTGTAATAACTCATTATAAGCCATTGTGGCTATTTAAGGTAACCACTACCTGTTAATCCGTAAACTTCTGTAAGTCTTCCTAGAGGAATACCTCCACCTAAAATTCTATCATATTGTGGAATCATAGTAGGAATGATATTCTTAATATCTGCTCTATTACTATCTGATAGTAAAGTTAAACCTAATTCTTTACCTAAGTCAATAGTATTTAAATTTGTAGTATCTACTTCTTTACCTTTTTTTGCTCTAGCCATTATATCATCCTTTTATATGAAATTTAAATAAAAGAGTGCTAAGATAGCACTCTATAAAGTTATTATAAATCTAAACCTGCTAATACATCATCTACACTCTTAGGTTGATTTTGTTTAGGTGGTTCTGGTGTTGATTCATTTGTGTTGAATGGGATTTGAGAATCGTCAATGTTATTAGCATCAAAGTTCTCAAATGGATTACTTTGTTCTTGTTGTGTTGGTTGCTGTGGTGCTTGTTGCACAGGTGTTCCTTGACCAAACTGTGTATTTTGTTGTGGGGGAACTTGTGGTGTTGGTTGTTGTACATTATTAAAGTTTGGTTGTGTGTTATTTTGTCCACCTAAATTACTAGGTAATTGTTGCTCTACACTTTGTTGCGTAGGAGCTTGTGTTTGCTCTTGTGTTGATGATTCTTCACCTAATGTGTTTGTTTCTCTACTGAATTTAAAATTATCATGAGAAACTTCTGTGTTATTAACATTGTTAATCAACCAGTTTACAAAGTTAGGGTTATTTTCTTCTGTTGGTGTAGCTAACTTATCTAAATCCGATAACTGCTGTTCCCAACCTTGAGGTAAGGCACCTAATTTTACTGTAGGATAAACAGTTACATTCCATGATTTTTCACCTTTTTTAGCTTTAGCAATATTAATAGGGAATGCATCATCGGCTGAAATAAAGCTGTGTGTAGCAGTAGGTGATGGTGATAACATTTTATCTTTTAATCGGTCAATCAATTGAGACAGACCCGTGTTAGATAGCTCCATAGGTTGAATAACAACATTACCTTGTTCATCTGTGTTAGGAACTAATTGACCATTTTGATTAAAGTATTCAATAACATGAATATATGCTCGTCGTGCAGGTTTATTAGGGAAGTTACTAAATTGTACACCTTGCTTTAACCATGTATTTACATAAGGGTCTACAACAGATGAGTTAACTTTCTCGGGTAAAGTAAGCATAGAGAACTTTTGTGCCCCGTCTTTTTTAACATAGTTAATACCTAATGTTCTAAATTCCTTAAAGAACTCATTAGAACCTGCTACAGGCGGTAGTACACGTACAAGTGCAGACTCTTTATTAATTTGATTATTGTTAACGTCCTTAATCTTTCCTAATCGCAAAACCGGATTCTTTGGTTTGTACGTCTCTACCTCATTGTCAAAACCACTTGATTGTAGCTTTTCTGATTGCTGATTAATAAATTGATTAAAATCCATAATATCTTTTCTCCTTTTATTTTAAAAATTACTTAATTAGTATAACATGTTTTCTTTTGTTTGTCAATACCTAATGTGTAAATGGGTTAGTAACACCACCATTTTTATTTGTTTGTCTTAGTTCCGCACTAATCTGTACTAACATAGTTGTACGTGTTTCAAAAGCTTTTACGATATAATGTAATTGTTTTTCTCTATAATTCCATGCTTCTACAACCTTTGCTTGCTGTTGATATTCATCAGAAAGAAATACAGCAGACTCTACTTGGTCTTTTGTAGGTTTCTTTCCCTGTTGTTCGTACTGAGCTCTAATTTGTAGATTAAGTTGAGCTCCTATTTTTTCTAACTTACGTTGCTCTGCTTCGGCATAATTACTCACACGTTCTTTTAAGGAAGCCCACCATGCAAATTTAGACGACTGTTGGTACATTTCGTCTTGAATTGTATACTCACTAAGTTTTAGTTCATCATGGATATTAAAAGTCTGTGTGTTTCCATTGTTATCTTTTAAGGTTAACTCATTGAAATCTAATGTATCTAAATGTATCTCCATAATACCATCCTCTATTTTATTATGATATAGGTTACTATACTATATAACTTTGAAACTGTCAATATTATTTTTAATATATTCCGTTTTTTGTTTGTACTGCTCTTCAGTTAGTTTACCTGATTCATAGTAGTCCTTAATTTGCTGTAAGGCTAGTTTATATTTAATATATCCTTTATATGAATTAAATTTATTTATTAACTCTTCGTTGTATTCTACCATATCATTATATGTTAGCCCTATTTCTATATCAGCATCTATAGGATACTGCCTTAACTCACCATTAATTTTTATTTTTAGGAAATCATAAGGAAGGTTCTCCATTACATGGACAATAACTTTAGCCATAATATTAACTTCTTCAGGAGGTGAGTCTACTACAATACTATCATGAACAGTAGCTACTAACTTCGATTTCATATTCTTATTTTGAATAAAGTCGTCAATATAAGTAATAGCCATGTTAGTAAGGTAACCACCTGTACCTTGAATAATCGTGTTAAAGGACTGTCTAAGACCCTCATTTTTAATCTTTTTATCTCTAGATTGTGCTGAGTGTATATATCTTCTGTGTCCATTCATTGTTTCTACATATCCATGTTTTTGAACAAACTCATGAGTTTCATCTATAGACTTCTTAATAGCAGGTTTATTAGAATAAAACTTATTAAATATTTCAGTAGCTTCATCAACTGTCATATTATTTTTACCTGCAAACGAAAACTCTGACTCCGTTTATACCCTCGGTTTCCCGATATTTATTAGGGGACTAGACTATATCTTAAGTAAATACGTTACTATCTACTTCTAGGCTATTCCATGTAGGTATGAGCTACATGTACTCTACTCGGTTATATTGCAATAAGCCCTCTCGGCGTAAAGCTCACCTTTTGATAGTCGTTCGATAAAATAATTTAAGTGTTTAAGTGTAATCAAATCGTTCTCTTTTCTCTATTTTGAATGTAATCCCATAACAATCTTCACCGGTTTCCATTTTTCTAAAGTTAGTGCCTGACGTAGGTATATTTAGTCTCTTTAGTAGCTTAGTTTTTACTCTATCATAATCAATTTCCACATGATTCTTATAAGCAACATAGTGAGGTGCATAAAGTTTAGAAGGGTTTTCTACAGGTTGATAATTATATTCTTGTAGTGTTTTAAAAACCCAGTTCTTATGATGTTTTCTTTCCCCTCTAAGAACTGCAGAAATATGGCTTTGAATTAAGTTATGTTCCTTAGCAAATTTAGACTGATTGAAGAATGTATATTCTTTACCTGTAGGGTCTATACCTAATATCTTTTTACTTCTTGAAGGTACAAATCCTAAGTTCTCTTCTCTAGTAGCCCATTTACATTTATCTAAGCTATATACTTTATTACCTAGTTCTTTAATATCCTTATCTAACACTAACTCACCATTTTTATACTTCTCTAAACTCCAACCATCAATTAACTCTACATCCTTAAGAAAGTTATTAAAATTATGCCATCTATCGTCTACTGTTATTCCTAGTAATCCATAATATTTATATTCCTTACATTTAGGATTATAACATCTATCTATCATATGAGACCATACATGAGCTAATTTAGAATATAGCTTATTGTGATTATATCTTTCTCCTATTTTAAATTCTATTTAAATCATCCTTACTTATTAAATTACACTTAAATTATTCTACACAGGATTAGCATTTTAAAGCCTTCCCTGTTAGCATAGTTCTTAACTACCATTTCCTGTAGCTCCTAACGTGAACTATACACCCTATACTCAATAGGTTTACCTAGTTTTACTACGGCTATATTTTGTTAACCGTAAATTAAACCAAAGGCTACAGCTTTACTGGCTTGTCTTTCTTCTGCTGTTACGTCCTTCATACTTTTACCATACATAATACTTGCCGTATTTTTATGAATATCTTGTCCTGTTAAAAACATCTCTAACATTTCTTTATCATCTGTATATAGTGCCGTAATACGCATCTCTAAGGCACTGTAATCGGCTTGTAAAATTACACCATCTTTAAATCTAGAGATAAAAGAACGTTTAATAGGGTGGTGATAATCAAACTTATTTACATCAGATGTATGAGCAGGAAGATTCTGAAGGTTAGGGTTGTTACTAGAAAGCCTGCTAGTATTATGATTTACAATATTATTAGCTACAAATGAATGGCTACTAGGAACATGTAAATCAAAAAATTCCATATCTTTTATTTTTTCAATTTTCTTTATTTTACCTAATAAAACATTATCATATAAAAGAATACCGTTTCTTCTGCCTAATGCCTTTAGATTTTCTGATTTATACTTTACTCTATCACGCTTAATACTCTCAATAAACCCTATTTCATCGTAAAATTTATCTAATGCATCATAAGTTATTTGTATAGAATAGCATTCATTTTGTACTTTTCTATTAATATTTTTATAAACTTTACCTATAGAATACCTACAATAGATACCCATATTCATTAGCATTGTTCTTATTTGTAAAGCCATTTTATTAGATACAGTATTATAGTACAAACTAGGATACTTTTTCTTTTCTGTTGCAGTATCTAAACTTAAACCCTTAAGAAATGCTTGTTGTACACTTTTAGGGCTATCTAATATTTGTTGTGGGATTTCTTTATTTAATGCTTTACTTTGCATATTAAAAATATGTTCTAACCATCTACCTAAACCAATTGAAGAAAATTCAATAGAATCACTTCTATCTTTATTACTAATGTAGTATGGTGTAATATCAAATAAATCTTTAGTTAGGTTAAAGAATCTATTCCTAACTTCAAGATTACTATTAGTTAATCTTATACTGAATGAACCGTTATTTGTAGAAAAAGACCCATCAGCTGTATACATACCGTACCATTCAGCAAAATCTTCAGATACATAATTAGGTAGTGTATAGCTTTTTGTGTTTGTAATACTTTTTTCTTTACTATATATAAAATCTTTAGTATCTAAATCAATATAACTATTATTATAAAGATTAGAATTATAAGACATTTTTATATAATCACCTATTTTTAAATCTTCAGCTACAACCCAATCATTATCTAGTAAATGCTTAGTTGTTTGTTTTGTTTTATTTAGAACCCTACCAGTATTACTATAATAATTATTTCGTAATAAGGGGTGGTTTAAAGTAGTAGTTAATGTAGTACCATCTTCTAAAGTAATCTTTAATCCATTTCTTACACCACTATAATAAAAGTGTGAAGCTTTTTCTAAATTTCCCTGTCTATTAACAATACCTACATCAATACTACTAAATACTTTTTCTTTTCTATTATTTGATAAGTCTTTTATTTTTTTTATACCTTTATCAGTAATAACTAAAGAATCACCTGTAATACATGCAGTTCCTGTACTATTATAGTTACCATGTAAATTATGTGTATTCTTATTTACTCTTTTAGGTAATTTCTTAGTAAAAGAATTTCTTTTAGTTTGCAAAGAGGCATAATAAATAAGTAAGTCTAGTAGCTTTTTATTATCTTCATTCTCAACCAAAGATAATGCCATCTTTATAGACTTAGTATCTGTTTTGTAATCTTTCCATGATAACTCATCTTCTTTAGTACCATTACTGAAAGGTTTATCCTTAACTGTCTCTTTACTATAAGGTAACTGTATACCTAAAATGCTATACAATACTTCACCTTTATGGTCACCTGAGCTTGGTTTAAACTTCCAACCTTCATCTTTAAATTTAGCTCTATACTCATGTATTTCTTTATTTCTATCAGATGGTTTCTTCTCATGTTCTGCTAAGGCTAATTGGTATAAATTATACCTAGTCTCCTCAAATTCTTGGATAGCCCAATGTTCTCTAATTTCTTGGTGGGTTTTTTCCATCTCATTAATATAAAATTCATCATTTTTATGCATGTATTCTAGGTCACAATGTAAACCATTTGATTGTATTCTAGCTAATGTTCTAATTAATCTAGGGTAACTTATTGACATTAAGTCCAATGCTTTAGGTCTATTTTGTTCTTTTAACTTTTCAATAACATCACAGTATATTCTTCTACAGACATCGGTGTCACCACTGGCATAAGGATGCATAAGCTCTAATGGAATCCAATCATAATTAAAGTCACCTCCATCTACCTCATTAATAACTTTAGTATTGTCTTTATACGTGTTAATTAAATTAATAGATGTACCTAATACATAATCTTTAGCTTTGTTAGATAAACTCATATACTCAGGTGATGATTCGGCTACTTCTTTAAATTCAGAATCCATAAGCATATTCTTTGTAATAACCTCAGGTGTTAGTTTTAACTCTAAATATCTTTTTTGCTCTTCTGTGATACCATAATACTTATCTTCATCTGTTAGTTCTATATCAATGTTATCGAGTTTATTTTTCAACCAAGTATCATACTCATTTGCTTTTATGTTATATTCTTTCTTAACAACTTTTTTATTTTCTTTTTTAATCTCTTTTAGTTTATCTGATAAGAATCTTAGTAGCTTCAATACATACCACTCTTTAAAATCTTCAAGGGGTTTGTCATATCCTCCTACATCTGTTACTTCGTAAGCAAGGTCTGATAATCTTAGAGACTCTGCTTGTTCTTGTGTTACAGCTAAATACCAACCTACCTTAGTGTCTTGATTATTTTCAAAGTCTGTGAAACCTTGTGTTGTCATTAGAAAATTTATATCATAAGTAGCATTATGTAGTACCTTAATGTCTTCTTTGCTAGCTACCCATTCTTTTAGTAAGGAAAGAATTTCATCAATATCTTGTTGTCCATTCTCCCAAGTAAAGTCTGATTTATATAAAGGTATTGTAACACCTTGACCATTTTCCCAACTCATTGATAATACTAAGGGTTTACTTCCTTCTCTATCAGGACTAAGTGAGTTAGTTTCTAAATCCCATGCGGTAATGTCTACACCGTCATGATTATCATTCTTTACTTCTTTATTAAATATTTCTCTTACACGCTCAATACTTGTAACAAGTTCATACTTAACTTCTTTAGGTTTAAATACGTCTTCACCTTGTTCTACAAACTTACCTAATAACTTAAGGTCTGCTACTACATGACGCTCACTATTCTTATTAACGTTTGTGTACTCTATGCTATAAGTAGGTAATACCCAAACATCATGTTTTTTATCTTCACTAGTAATAGTTACTTTATTAGGTACACCTCTAACTTTACCAATAGCTGATACATTTAATAAATATTTAACCCCTAGCTTACCTAAAGGAATAATAATATCGTACTTATTGTTTATGATTATTTGATTCATTCTTTCATAGTAAGGTTTAACTTCAGATAACTTAACGTCTTGGTACTTAATTGTTTTACCATAATTATTCTTAATAGGTGTAGGCACCATAGGATATAAAAACTCAATATCATAATCTTTTGTACTTCTATCTCGATTAATACCAGAAATATTAGATAATAGTTGTTTTAATACTCTACCATTAGGTGTATTTAGTAGTACATTCTTAACACTACCATCATTACTAACTGAAAAGTGTTCCTCTCTGATATAGTCGTATAAAATTAAAACTTTCATGTTATTACCAATCCCTTCTTTAACTTAAATACAGTATAGCATATCTAATCATAGTAGTCAATAAAAAAAAGAGGAACTTAATCCTCTTTGTTTAATACATCTATAACTTTATCTAATTCAGACAAAGGTTTAAACTTTAGTGCCTTTCTATTAGGTAAAGTGAAGTATGTTTTATTTAGTCCATCCCATGCTTTTTTACCTTTACGCTCTACTACTTCTATTTGAAAGTACTTATGATTCTTTACCTTATCATAATCTTCAAGTAACAATTCAGAAATAGCTTTTGTTTCTGCTTCTAGTATCTCTTCTACGTCTTGGATATAGTACCCTGTACTCTCAGATATCTTTCTTGCTATATCTCTTCTATTTGCTGTACTCACAAAATCACCTAAATCTTAATCTTTCTTTGTCTTTTTAATTCAGTAAGTAGGTCTTCTATTATTTCATAATCTTTATTTTCTTTACTAGCAAGAATATAGATATACATTTTCCACACGGACAAAGAAACTCTTAATTTATCTGCAAAATCAAGTGTATACTCAGGATTTAGTTTATAAGCTTCTTTATCATACGTATAGTACTTACCTTGTTTAGCGTCTATAGAACTAATACGAGGGAATGATAGATGAACCTCGTCTACATTTGTTTTAACATCATATAAACTTCTAATAATATCGTAAGGATTGACGTAAGGAAATACAACTGAAATATCAATAATGACTTTTGTTCCCATGAAACTCAAGGCTATATTATCCATCTCTTTGCTATTGAATTTACTACGCATTCTGTATACAACTGAGGATTTAGGGTGGGCTGATAAGTCTTTAAGCACATAGTAAGGAACTACTGAATCGGTATAGTATGTTACTTGTCCACCATGCTTACATATTTTTTCAATCAACTTATCATTGTTATACTTCTCATTAAATAGCATGTAATGTTTATTGTCTCTTAGTATATACCTAGTTGATTTATTAGCTAAGATATCCATATCTTTTTCTATATCATCTTCATTTAAAGTTGTAACTTTAATAGCTTTAGATAATTCATCTTTGTTTTTTACATGTATATTAAAATATCTATCACTATTATATATAGTTAATGTCTTATTTTTTGCGATAACTATTCATCCTTTCATGAAAAAACCTACTACCTTTTACTAATATAAGTATAGCATAAGTAGTAGGTAATTACAAATTAAAGTAAATCTAATTCCATTAAGTTTTTAGGTGTTACTTGGTCTTCGAACTTCTTAGCAAGTTCCCCATCTTTATAACCAATAAGTACAGGTGTACTCATAATGTCAAATAACTTGACCGCTTTTTCTCTATCTACATCTTTATCATCTAAGTTAATAACATAAACAGGTTTAGTAATATCTCCTTCTGCTTCGAAAAGAGGAATCACACTTTTTAAAATTTCACATTTAGCACACTCATCTTGTGTAACCATGACAATAACATCTTTCTTTTGTCTAATTGTTGTATTTAATTCTAGTAAACTATTCACTTTTTCCATTTTCTGTATCATCCTTTTCTAGTGTGTCAATAATATCTTTAAATGTTTCAATATCAGCTACATGTGTTAACTGCTCCGTACCATCAGCTTTAAATAGCTTTAATGTACCTTCATATATAAGAATGTACACATATGTATTATAAATAAACTCTAGCTGAAATTTACTTGATTTACTATCTGCTTTAGTATCATCTTCCCTATTAAACATCTTAATAGGGTCTTGTACATTACTTACTTGTGAGAAAATATCATTTGATTTGAATATATCTTCAGTTCTACTTAGTAATCCAAACGCTTCTTTTTTATTCATTTAGTCACCTCTTTAGGCTTCACAATTAATACAAATTTTAGATAAATTGAATTGTTGTGATGCATTTGTACCATGTTGATAATACAATGACTTAATACCATTAGACCATGCAAAGAGATAAAGTTCATTTAACTCCTCTGCTGTAACATGTTTAGGGTTAATCATAATGTTTATAGATTGTCCTTGGTCAATATATTTTTGTCTTGTAGAAGCTTGGTCTAATATATTATATTGATTAATTTCACCATATGTTTTAAATACTTCTTTTTCATAATCACTTAAGAAAGTTAGGTGTTGTACGGAACCATCATTGTCCCTAATACTCTCAATAACTTTTTTATTGTCCTTTCCTTTTTCTTTTAATAGTCTTTTAAGGTAAGGATTAATCATAGTTTTCTTTACTTTAGCAGTGTCTACAACGTAATAATTACTCATAAAAGGTTCAATTGATTTAGAAACTTGACCTAGGATAAATGACGAACTTGTTGTCCTTTATGTTCCATGTAGTTCGTTACTTTACATGCGTTAATTTAATAACAGCTCTATGTTTCCATAGAGAGCAGACTATATCACATCTTACTAAATGTAAGACCACTCCCACTTCCACTCACTTGAGTGTACTCCCCGCAACAGGATAGTCGTTGAACTTTATCTATTTATATCTTGACAGTTTTTTAAGTACTCTTTAATACTTACACTATATACATTTTTATCTTTTTTAAGTCTATTATAGAAAACATCTTGTCTTACTTTAAGAGCCTCCATAGCTTTCTTTGCACTATTATAGTATACATTATTTACAACATAACAAGAGCCTCTCGTATTTAATTTTCTTGATGTTTTCCAAAAATCTTTATTGTGTACTTTATATGGTTTTTCTATCCATTTAAATGAGATGTACCCATCAGTTTCTTTTTCTACTCTACGTATAAGATTTCTATTTATACCTAATGTTTTACCCATTAAAGTTAAGGAGTCATAACTAGAAAAAGGTTTGCCATCTAAGTAGACTAAAATTAGTTGAGCGTTAGCGTGTTTAACACCTAAAACATCATAACCATGTTTAGTATTTTCTGATATAGTAGCCCATTCTAAATTTTCAACCCTATTATCATCTTTAATCCCATTCTTATGATTTACAACAGGTTTATTGTATGGGTTTGGTATATACGCTTCTGCTACTAATCTATGAACTCTTGCTGATGTGGATGTACCATCTTCTTTTCTTGTAGAAATTATTGAGTAACCATCTTTATCATACCTATGTCTTTTTTCTACATATCTTTTCCATGATTTATTCCACATTCTTACTCTTCCATCCTTAGTTACTTCGAGCCTAGGAAAACTAATACTATTTTTCCACATTTATTATCACCTCTTAGTAACTAGTATAATGTATATATTTGTTTTTGTCAAGTTAGCTATAAATAAATCTTAGCTTCTGATTACCTTATGTTTACACACTTAGGCTTTTCAGAAATTCAAGAGTGTTATCATATATGTTAATCCATATACGCCCTATAAATTAAGGTGCTACCGCCATCAAACATGAATTTCTTCTACCATAACCTTTTAAAATAGAAGGCTCTCCATAAAGTTTAGCTAACTGCTCACTAGCTTTATAAGTTTTTTCTTTTAATAATTTAAATATCTCTTCATTAATTTGACTAGCTTTAATACTTTCAAAAGGTATGAGTTTTGATTGTAAGTATGAATGATATCCAAGAACGCCTATTCCTAAGGCTCTGTTCTCAACAGAAAAGTTATAAGCTCTCTCCATAAATTTAAATGCTTCTTGTTTATCTTTTTCAGCTGAGTCTCTTAGATATTCTAAGTCTCTAATAAACTCAGACATAACAGCATCTAAAAAGTAAACAAGTGTCTCTACAGCATCCGTGTGTTTCCATTCATCATACTTAACAAGGTTCATACTAGATAGGTCACATACAAATGACCAATCTTCTTTATTAGGTAACATAATTTCACTCCTACATGTTCAATAGTGGTCGTTAATCACTACCAGTTCTCTAATTAACAATATTTATAGTTAGGGAATTTTTCAGAATTACATCTTCTGGTTAATGTATTTCTGTTTATTCCTAGCTCTTCAGAGCATATACCCATATTTTTATAAACTACGCCATCAACAATAACTTTTTTAGCATTAGCGCTTTCTTTACCATACATCGGATTGTTTTTTCCTCGTCTATCCATTATATTCCACCCAAAACCTATCTCCATATTATAACCTTTTTTTACAGATTCGTACATGTCTATAAAAATTTGCTCTACCATGTAAGCAAACTTTTTATCCTCTGTACTAAAAGTGTATAATTCTTCTACATAAAAATTCTCTTCACCATGTTTCATCATTGATTGGTGTAAATTAGTTGTTGAGCCTATCTTAGCTTTTCTAATATGATTTTTAAATCTATGTTGAACTGTTTTTGATGTAATTCCGATGTATATTTTATTATTGTTTTTGTTTGTAATTTTATAAATATGGTACTCCATTTTCGACCCTCTTAATTATTATTGTTAATATGAACTTCTATATGTTTCCATATAGAGCAGACTATATCATCTTCCTTAATAAGGAAGTCCACCATTTCGATTTAAATAAGATTTACTTGATTATTACTCAATACTTATACCACTTGGCTCTAACCTTATCCCTTCACTTATGTGAATAGGTTACGGATAGTCGTTAGGCATTTACAGATTTATAATCTGATTTAGCACGGTGTTGTCGTATATTTTAACTTAGATATTCACCGTTTAGATGGATTTTTCGATAGTAATTACTTACTAAAGGTGCAAATTTTTACACAAATTTGAGTTATTAATAGTTAACCCTTTGTCTTTATATACATCTACTGTATTACTATTTGCATTATCATGAAAGAAGATATAAGGGTATCCTATTTGTGTTCTTCTTGTTAATACTTTAGCCCATATTTTTCTCTTTTCTTTGTTCCCATTAATCATGTCTAATAACCAATCATCAGTAACTGTTACTGCATGTGTTAAGTTTTGAATTGGATTACCTTCGGTACCAATCTCTAAAAACTCGTCAATATCTTTGTGTTCTATAGGTAGATAAGGGCTAAAACGCCCTCTGCGTGTAGAATTACCACAAACTAATGTATGCCCTTTCCTTCTTACAACAAGTTTATGAGTAGGTACTTCAACACAATATACTTTACCTTTATATTGTACCGTTTCCACAGTAATATTTGAGCCTCCAAATAATTGACCTTCAGATAGATATATTTTATACATAGTGGCTTTATTAGGTTCTCTTTCCCTTAAATCAACTGATTTACGAGATTTATAACCTACCATAGAAGCTATGGCTTGAACAATGTCTACATTATGTTCAACCACACTCATGTAGATAAATGATTTATCCGTTCTTCTACTAGCATCCCAATGAGACAACTCATCAATAAAATCATAAGCCCATTGTTGTGTGACATTTTGTAAATTTACCCATTTACTAAATTCTTTAGGTAATTCTTCACCCATATTAACATAAATATTATGATTATTGTCTTTGTCTACATTATATGTGTATTCAACTCCTAGACCATCTAATATCCATAATAGTCTATCTTTTTTACGTTCTTTACTAAATCTAAACTTCAAAGATTTAGGGTATTTTTTAATAATACTACCATCTGCTTGCAAGGCTACCAAAAGACGTTCTTTAAATGTGAGTCCTCTGCCTTCTTTAGCAAATGAAGAATGTGCTAAATAAACGTCTCTATGTAATGGCATATCTTCTGCTAATCTATTTCTATACTCAGGTACTAAAACACTTTCTCTTTTTCCTGTTTCTTTATTAGTCCTTTTAGTTCTGTATTTAAAAACCATATTATGGTTCTTAGTCACTAATAAGTCAATATTTTTACTATCTTTAAAATGAACTAATTCATTATCTTCAGGTACAAATTCCATATAATCTGTAGGCTCTACAAACTCTATTTCATCATTATCTGTTACCTGTGCAATTTTTGTTCCATCTTTTCTACTAACTACATTAGATAATAATTCATACCCATTCTCTGTGAGTATTTCAGTTTTATCATCATAACATCCTTGGCTTATTGTGTCCGTCATTTGCTCAAATAACTTCATAAAGTGAACGGAACCGCTTGTTACACCATTATCAGTGATTTCTGAGCCTCTAGGTCTGATGTTACCGAAGTAACCACTTGTACCACCACCGTATTTACTCATCATACCTACTTCACTAGCAGTATTAAGTATCGATGGTATAGTATCATCTACCCAACTACCAAAACAACTAATACTAAATCCTCTATCTTTCCCGAAATTAGACCATATAGGACTGGATAAGGAATAATAACCTTTACTCATATAATCATAAAACTTGTCAGAAAACCCATCAATATCTAAAATATCTTCAGCATAATCTGCAATATCTTTAATTCTTTGTTCTGGTGTTTCACCATCACTTAAATAACCACGTTCTAGAAAAACTCTAGAATCATTATTTAACCATTCAAAATTACTCATCTATATACACTGCCTTTATATCATTTTTAGTCTTAAAATAGCGTTTACTTTATCTTTAGTAACTCGTTTACCAGTATTTTCAAAATCAGATTCCGTTGAAAAAATAGTATCTTCCGTTACAGAATTACTAAATTTTGTATAGTTTACAGAACGTTTAGATAAAAAGTCCGTTAACTTAGTACTAATAACTTCATCATCAAACCATGACACTTCACTTAGTAACTCTTCATCAACATCAAAAAGTTTAGTATACCCAACAGCTACTAGAGAGTTATTAAGCCTATTTTTAATAAATTCTTGTACTACTTTCTTAGGTAAGAACTCTAGTTCCCCATCTTCATACATCCAATCAAGTAACCGTGTTTCTGATTCATAAGATTTTTTACAGGCTGTGTAAACTGCATCTTCCATTTCTTTGTTGAACCACTCAGGTCTTTCTTCTCTAAGAATATTAATGATTTCTGTTCCAAATAATCCATGGATTTGCTCTTCTTTAGATGTAGCTTCAATAGCATTTGATAAACCTCTAAATAAGTTTTTATATTTATTAAAACTCATCATAATTAAAAATTGACTAAATAAAGATACATGTTCAATAAATATAGAAAATAATAAAACAGATAGTACGTAATCTCTATCATCCTCACTCTTACTTAGTTTTACATGCATCGCTAACTCATCAACACGTTCTTTAAGAGCAGGAATATCGTCAATTGTTTTAAACTCCTCATTCAAACCTAAAATCTCTAATAAATGTGAATAAGCGTCGGCATGACGTGCTTCACTCTCACTAAAAGTTGCACCCACAGCTCCAGTTTCCCATTTAGGCATTCTATGATATAGGTCACCCCAGAAAGTCTTTACTGCTACTTCTACTTGGGCAATTGCTAGCATAGCTTTTTTAATGGTCATTTGCTCATTGTATTTAACGTTATTCTTATAGTCTTGAATATCTGATGTATAGTTAAACTCGGTGTGTACCCAGTAACTTTGGCGTATAGCATCTTTATATTCTAATAATTCAGGGTATTCATAGGGTTTTAATTCTTTTCTTGGTTTGAATAAGTCTCTTTTACGCTCTCTTTTCTTTTTATCCCTATATAAAATAAAAGCTTTAGCAGTATCTTTATACATACTACTAAATAAAACTTCTTCTACTATATCTTGTATTAATTCTACAGTAATGATAGTGTCTTGTTCTTCTAGTAAAGAGTCTACGTCATCTACAAGAGAATCAATAACATCTTCAATATATTCTTCTGTTTCTGAGTTGGCTCTTAAAATAGCATTAGTAACTTTACTTAAATCATAATCTACAACGGAACCATCACGTTTTTTTATTTGTGTAATCAACTAGTATCCCTTCCTTATATACCATCAAGTAAATCATCAATCAACTTATCTTCTTTTTTACTAACTTTAGATATTTTAGACTTGACAACTCTATATGGTTTAATCTCTTTTTTGTTGTAGCAAGATATAATATAAGAAGGTGTTAAGTTAGTCAACCCACCTATCGTAGTTATAAGAACATCATAAAAATGTTTATCTTTTCTAACATTTTCTACAATAAAATCCGTTCTCATAATAGGGTATTCTTCATCTCTTAACTTAACATATACATCTTCTATATAAGGTAATGCTACATATGACTGTGCTCTATTTCTTGTAAATATTAAACAAGGAGTTTTATTAACTTGCAAACTATCTCCTATAACTTGTTCCCACCATGTATGAGGTTCTTTATTATTAAGTAGAACATTATCCATAATCCAATTTTCTCTATGTTTACACTCTACAACTAATGGAAAATTAGACTCTAAAGGTGCTACAATGTCACCGACAGCATTATTGTTAGCTCCCCATGATGCACCTCCTGATTGTGGAGACCTACTAAAAGGATAACCCCACCAATCAGAAAGTTCTTTGGCAATCTTTCTTTCGAATACATCACCTTTTTTTTTACTATTTGTCATGTTTCTTCAACTGCACTACTTTTTCATTATCTTCTTTTGCTTTATGCTCTTCTTGTTTTTTTCTTACTTCTTCTTGTTTTTCTTCTAAATACTTTTCACGTTTTTCTTTTAATTTAAGTTGCGCCTTCTCTACTTGCTCAGTAGTTACATCTAGGTTATCTTCCATAACAATCATTAACAAATCAATAGCATTAAAAGCATCATTAAAGGCAGATGCATACTCTTGAACTGTAACGGCATTAATTGCTCGTGCAATTCTAGTAGCCTCATCTAATGATACACTACGTGCTCCAATACGATGTAATTGTTTAGCAGTGTCCTCAGTTAATTCCTTGCCTTCTACTGTTCCTTGTGTAATAGCTTCTAACCACATGTCCATATCTTTTTGTGAAATACCTTTTGTATGTGTACTAATATTTTTTTCCATTATTCTTCATCCTTTTCTTTTGATTCTTCAATTGCTTCCTCAATATATTTTAATACGTCATCGTTAACTAACTCAGCTTTGTATAAAGCATCAATTAGAATGTTTAAGTTTAACTCTGTATTTTGCTCTAGGTCAACCATTTGTTTATTAACACCTAACAATAAGTTAGTAATAGCCTTCATTACATCTGTTAAAGTTGCTGTTTGTTCTTTACCTAACTCTTCTAATTGGTGCATACGCTGTTCATTACCTACACGTAATGCTGTAACATACTCATCTACAAAATGTAGAATATCTTTCTCTTCCAAAATAACACTTCCTTTATTTTTATATATGTATTGTAACATACTATACATTATAATGCAAGATTAAAGTTTTAACTTTTGTTGTAACTTGTAACTTTGAATACTTTCAGGTGTAACTAAAAATCTATTGTGTTTCAAAGTACTAAAAGCTTTTTCCATACCCATATCATTAGCATCTTCATTACCATGTGGTACTAAATACACTACATTGAAATGTGAGATAAGCTTATTAGCTAAATTAATACTAAAGTCTGTAGCGTCTGTGTCTAACATAATATATATAGGTGTTTCTTTAGGAATACTTGAAATGAGGTTATTAACTTGTATCTTTGAAACTTGTTTACCAAACGTAGCTATACCGTACTTATCAAATGTAAGGGCGTCAAAAACACCCTCAGTTATAACAACAAACTTTTGTTTACTAGCTATATTTAAATTAAATATAACATCGCTTTTACCATACTCATTAGGTTTAGAAGGTGCATTTATAGATTTAATATATGGATTTGTTTCAATACTTCTTGTATTCCAGTATATATACTTACCTTCATTATCATAAGTAAAAAATATAACACTATTTCTAAGTACTATTTTCTTTTTCTCATTATTAATACCATAAGAATAGCAATAACCATTTATAATATACCCTATACTATAGTCTAGGATTTGCTGTAGTGTAATACCTCTATTCTTGAGATATCTTAAATACGGTACTACTTCTTTATTATTTAAGTTATCTTTAATCAATTTAAACCCTATAGGTAGTTCAGGTGCTTTTGATTTTATACTACTATTATCTTTTGTATATCCATTAAGCCTTAGTAATAGTTTCTCACTGTCAGTTAAATCTGTGTTATATATTTCTAATGTTGGTGAGAATTGTATATCAATATTCTTTGTTTCTAATAACTCAAAAGCTTGTCTACCTGTAATACTATAATAAGATTTCATAAAAGTAATAGGATTACCATGTTCTCCACACTTCTTACAATGATACATACCATTAGTAGAGTCTAAAGACTGCTTAACATAAAACTTGTATTTCTGTTCTCCACAAAAAGGACAACAATATCGTAATTCTCCTACAGTATTCTCTTTGGGTGTTCCAATCTCTTGACTTAAAAAGTCTTCAAACCTCATTTTCAGTCACTTCCTATATAGAAACAATTTTCTTCATTAATAGTAACATATTATAGATTTGACTTAAATCACTATAAGTATCATCTACCAGTGTTGTACTGTACTTGAGTACTTCATTTAATTGATAATCCTCTGATTTCTTACTAAAGGTGTTAATCTCTTCAATTGTTTTATCTTTCAAGTACTCGTTTGTACTGATTGTTTTTAGTGTTTGGAAAATAACACCTAAGTCACTAAATCCTTGCTTTACATCTTTACTTGTGAAGGGTTCATCTATAGTAGGTAAACCGTACAACTTAGCTTTCTCAATAATTTTCTCATTATCTTCTTTTATTTTTTCGTTATACCATAATCCTAATTTACATTTAACAGTTTCACATTTATATAAGGTTTGGTGAGTTAACCCATAAGACACAGGTAAGCTAGAGCGTAATCTCTTTAGTTCAATATATCCAAAGTCATTACTAGCTTTATACTCGTATGCATTACTTAAAGGGTACCAGTCTACTAAAGTAGAAACAGGAATATTATCTATATGTAACTTTGCATTGTTTGTATAATTTACTGTTAAAGATGCAAACTGGTTATCTTTAATCTTTAGTTTCATTATTTAATTCCTTTCTTAGTGTAGCTACACCGTTTTCTTTTACTACCGTAATTGTATTCTCAAATAAAGGTGCTAGACTCTTATTATGAGTAATAACAAAAATAGTACCTACTGTTTTTAGTCTATCTTTTAGTAGTTTAACTACGTTCTCACAACCAATAGTGTCTAGACCATCAAAGCATTCATCGTAAAGGGCTATATTTGTAGATATATCTTCTTTACTCATAATTAAGTCTTGGATAGCAAAACTAATAGCTAGGTCAATACGTTTTTGCTCTCCTGCTGAATTAGATTTGTAAGACTCTCCTCCATTGTTATTCTTAACAATAACATCGAACTTATCTTTAAGTTCTCCCTTAGCATTTTCTACTTGTGTTTGAAATTCAATTTCGATATCCGAACCCGCTAATATTTGTAAATACTCATTAGCTTTCTCATTTAAGAACGGTGTAATAAAGTCTAATATTACAGAACGTAATCCTTTATTACTAAATGCATCTACAGCTTGTTTATATTTTGTTTTCTTACTCTCTAATTGTACTATATTTTCCTTATGTTTGTCAATAGTATTGTCAATATCTTTTAGTTCTTTATTGTGTAATTCTTCATTAGGTTCTTCTATATAAGAGTAATCATTTAATATTGGTTCTTTTAAATTAGCTTTAGTGTTTTCTAATTGGCTAATTTCATCATATACTTCTTGCTGTTCTCTGTATTGCCGTTGAATATCATCATCATGTTTTTTCTTTTCTATATCTTCTTGCTGTATAAATTGTTGTAATTCTTTAGATTTAGCTAGTAGCTCTTCTTTCTTATTAATTATAGCCTGCTCATTATGTTCGTACTGAGATATTTTAGCTTGTTTTTCTTTAATTTGTAATTCTAAGTTTTCTTTTTCTTTTATTTTGTGTGTATTATCTATAGGAGAACCACAAACAGGACAATGGTCATTTGTATCTAGTTTATTAATAGATTGTTTTAATTGATTAATTATATTTAGAGTTGTATTCTTATTTGTTGTTTCTTGACTCAATAATGGCAATAATTTATCATTAATATTTGTGTTAATCTTTTCAATACCTTGGTTAGCTTTTGTATAATTTTCACTAAATACAAATTCAAAGTCTTCAACTTTAGGAATACTACCTTTACATACACCAATCTGATTGTCTAAATCTTTTAATTTATTCTCGTACTCTTGTTTCTTTTGATTAAACTGTTCCTCTTCTTGCTTCTTACGCTCTAATAAGTTATTATATTTATTTACTTCATTATTATATTGTTCTTGTTTTAGGTTTCTTTTATATTCTAGTTTTTCTATTTCTTGTTGTTCTTTACTTTGTTTCTCCTCTACTTCTTTAACTTTTTCTTTAGCTACTTCTTGGGCTTGTTTATAAATATCAGTCTTAGTAATAGATTCTAATATTTCTTTTTTACCTTTGTCGGTAGCTTGTGAAAACATAGGGATGTCACCTTGCCCATATATAATAGCATTTACATATGTATTAAAAGGAATACCAAATAACTCTTGTATTTGAGTATCCGTAACATCATTTGTAGAGCCTGTTATCTCTTTGTTATTACAAAACAGCTTAACCTTGTTCTTGTGTTCCTTGTGTTTACGATATCTTTCGATTAAATACTCGTCTTTACCTATGTTGAAAGAAAGCTTAACGTAGGTGTCTTTCTTCTTATACTTATTAACAACATCATCTGCCTTTAAACCTTTCTCAGTCTTTCCGAACAGTGCATATGTGATAGAGGATATCATGCTTGTTTTACTTGTTCCATTACTTTCAAAACTATCATTTGTTTTATTAATACCTTCAATAAGTACAAGACCTTGCTTATCCAGATTTAGCTTGATATGCTCAATAGCTAAAAAGTTATTCATCTCTACATAATTAAACTTAACCATTTGTACCACCTTCTTTTAACAATTTAAAGAAACATTGATGTGAACCATAATCTAGAATATAACAATCTTCTTGTTCAATAACCCTCGTATAATAATGAGCGTAGTTAGCTTCCTCTAATACTTTGTTAATAAGGTACATCGCATCATCAATATTTTTAACATTACATACATCATATGTTCTTTTATTATGTAAGAACTGTAAAATAGGTTTAGATTTATCTATACTTGGTTTAATATTCTTTATAATAATATCTATCATACTACAACACCGCCTTTAAACACTCTAGAAGCTCATCTTTTGCTTCTGGATAGTATTTGTCTGCATAACTAGAAGTAATCGTTATAGGGCTGTCAGACACGTCAGCGTCGACTCTCTTTTCTACTGTGTATTCTTTCTTCATTTGTACTTGTACATTAGATTCATCTTCTGTTTTATCTAATTCAATTACTTTAGCTTGTTCTGGAGTACCAATAAACCTAATAAAGTGACCTTGGTTTACTAAATCATTCATGTTATCTGGTACATTGTCACCTTGTACTGTAATAAACTTTCTAGTATCTAATGAAATGAACGTTGATGTTAGCTTGTCTGTGTCTATTAAGTGTACGCCGTTAGCTTCTTGTTCATCTGAAAAGGATTGTTGCATTAAAGAACCACCATACATATGGTTAGGATTATTGTTTAGATATTGGCGTCTATGATAATGTCCAAGAAGAATAAAATCATATTGTTCTGGTAATAAGTCTTGGTAACCAAATGCACCTTCTAATCTATGGGAGCCTTTACCTGTTAAACTATTCTCTACGCCTAAGTGTGCTACTAAAATATTTACCTTATCTTTAACATATGACTTACTAATAAAGTCTTTAATTTCCTGTACCTCATCACCATATGCACACATAGTTAACTGTACTTTTGAACTTAATGATTCACTACGCAAAGACTTAGTAACTTCAACATTAGGTAACGTTTCAAAAATGTCAATACTAGATTGAGTATACAAACTATTTGAAATAGCATCATGATTTCCACGTACCATGTAAACTTGAATATCTTGATTATTAGCAAATGTTTCAAACACTTTGTTATATACCCTAGTATCAACTGCATTACGTTTGTGGTACAAATCACCCCCAAATATAACTTTAGCTTTATTTTCTCTAGCTAAATCAAATACTTTTTGTAATGTCTCAATTTGTTCTTTAAATCTATCATTACCATATTCTTCATCAGGTTTACTATAATTCGTAAACATATGAAAATGGCTATCTGTAAAAAATATAAATTTCATTAGTGTCCTCCTTTAGTACGTTATGATAAAAGTATAACCCTTAACAAACATGTTGTCAAGGGTTTTGTTTTAATTTGTATTATTTAGTAATCTATCTTGTGCCATACTGAAGTATTCTTCTGATAATTCACAACCAATAAAATTCCTATTTAACTTTTTACATGCGACACCTGTTGTTCCGCTTCCCATGAAGCAGTCTAGAACAATGTCTCCTTCATTAGTTAAGCGCTCTAACAACCATTCCATAGCATATAAAGGTTTCTGTGTTGGGTGTCCTTTACCTAATTTTTCACTTCTAGGTGTTACACTTGTTTTAATACAAGGTCTTTCATATTTTTCATCTAAACGGTTAAAAGTCCATTTAGCTCCTTTTTTAACAAAATAAAGAGCAAATTCAGTATCAAAAATAAATCGTCTATCTCTATTACGAGGCATAGGATTAGATTTTTCCATACGTATAACATCTTTAAATTCACAGCCTAATGCTTCCATAGTATCAATAATAGGTGTAAATTGTCTCATGTCACAAAACACAACGATATTACCACCTTTTTTAACTTTTGGTATATCTTTATTAATCCATAAAGTAGCTTCAAAATTTTTATCCCATTCCCCAAAATCAATACCAGCTCTACCCATAGTTGTGAACCTATTCTCTTTTGCAATGTTATATGGAGGGTCTGTTACAATAGCATCGATACTATTATCTTCAACTGTATCTAGTGACTCTAGGCAATCCCCCTGTAATAATTTTATCATTATTTTACTCCCTCTTCACTAATTCCTATAACATCATGATTAGCAAACTCCTGTAATTTAAACATATGATTGTCATTAATCTCATTTAGTAGCTTACTTGAATAAAAATGTATCAATTCACATACCTCATCTGTGTAAGGCTCTCCTCTTAATATATCTTCAAGGATATCCATTGCTTCTTCCGTATCTACCTTTACATGTCTTAAAAATTCAGTGTTATCTTGTAGTTCCTGTATTGTCATTTTCATTGTTTAGTATCTCCTTATGTTTTTCTATTCTTTCACTGGCTAAATTATAGTATTCTTCATCTAATTCAAAACCTATATAATTTCTATTAGTATTCATACAGGCAATAGCAGTGGTACCACTACCCATGAAACCATCAAATACTATATCTCCCTCACTACAATGACTTTAAAGTTTTTTAATTTTACTTTTGCTTCATTTAAGTTCAAATCTTACCACCTCTTTATTGTTTATAATAAAAGTATAATCCTTAACAAATACATTGTCAAGGCTTTTTCTCAATTTTTTAACTTATATTCAATTGCTTTAATTACTTCTTGATGTGTATTGCAAGGTATAGCAGGTACTTTATTAGACATAACGTTGTACTTATATCCTGTTGTATTATTCCTTGCTATAGAGTCTAGTAATGTAACACATACATTAGTTCCTTTTAATTGGAAGGTTCTTAATCCTGTATTTGTATAATCCCATTCTGCTTTATTACGTGTAAATGTTCTACGTACTTTTTTATAAAGCTTAGTAAAGTCATCCATTAAAAACTCAGCCCTCCAAAAGAATTATTAATAGCTTCAGCTTTATTAGGTTTTTCTTTAAATCTACTTTTATCTTCACCATTAAGTTCCGCTAGTATTTGCTTATGTTCTTCTGCCTCTTCTGGTGTTTCATCTCTAACAACCATTTTAGTAGGCTCTACTTTAAGATTAACAAATCTCTCACCTGTGTTTGAACTGTTTCTTACTTTGTCTAAGTACAATCTTAAAAAACCATTTTTAAATTCTTCATCTTTTTGGTTAACGGCAAAAGCAACCTCTACAGCATTGACAATCTTTCTACTTCCCTCAACATGTTCACTTGTAATAATTTCTGAACCATAAGCTGTTCTGTTTGTTTGTGCTAATGTCCAACAAACAAAATTGTATTCTTGTGATAATTTTCGAATATCTTCAAAGATACGACCACCAGCATCTGATTCACTTTGATACTTAAGGTAAGGGTTACGCATAAGTTTAGGATAATCAATAATAACAACATCTATATGCTTATCTTTCTTAATTGTTGTATTAATTATAATTTGTTCTAATTGGTTTGGTGTTACCTCACCAGGCATATGTTTAACGATATAAAAGTTACCTAGCAGTTGTCTATTCTTTTTATAGTGTTCTTGTATCTTATTATAAGCATCTGTGTTTAAAGATAAGTCACCATTAAGTAATTGATTCTTTTGTACACCTACCATTTGTTGTTCCGCTCTTAATACCATTCTATCCATCTTTTCCTCTAGGGCAATATATAAAACATTTAAACCTTGTTTAACATAGTTCTTACCTAAATTACTTGCCATAAGAGACTTACCTCTACCTGTAGGTGCAATAACTAGTCCTACTTCCCCTCTACCAATACCACCTTCAATTTGTTGGTCTATAGAATGGAAACCTGTAGAATATTTATTAATACTTAAGTTACTTAATAGTTCTCTCTTCTTGTCTATATCTTCAAAGAAATCAATAAATTCACCATCAGTACCATTAATGTCACTAACTTCTATTTGTTTTAGTTTCTCTACTAGTTCAGGTAAGTTATCTGAGTCCTCTTGCTTATTCTCAGCTATGAACTTAACTAATACTTCTTTAGACATTTCTGTTTTAATATATTTTTCTACTTCATAGTTTACAGAATCGTCTTTATTATTCATGTCTACTGTATATAAACTATCTAAATATTTTAATGTTTGTGTTACTTTTTCATCATCTTGTTTATCACTACCCATTAATTGCTCTACTTTAATAGCTAAAGATTCGTTTGACATTTTATCAGCAATGTGTGCTGTTCTTTTTATAGCTGTGAATAAGTAACCCATGTCTTCTGATTCTGTAGCAAATAGACTTTTAGGTAACTTATCTAGTACTTCTCTTGCAAAATGTATATCCTTCATAGACTTATGTAGGATAATCTCCTTAATTCGTTTACTCATATGTGTCATCCTTTACTATATCAATAACCTTATTGTATTCTATCATACCTTCTTTTGTCAATGGTATTTCATTAAATAAATTATACTTTTCAATAATAGTCTTAACTTCTGTTAAATTAACCTCATATCCTAAATAATTACTATACATTTGTAGAATATATGATGTTGAAGTAAATCTTCTCATATGTAGATAATTCATTGTTGTTTGTTCTATATTTACAATATCTTGTTTACTTAAGTCTGTAGTGTTTACTAAACTTATATCTATTAAGTCTCTTCTATCTATACCACCATTTAATTCTGCGATATTTGCTTTATACTCTTTTTGCATTAAAAACATAGATAGTCTAGCATTGTTAGGTATTGTAGTAGGTGAATACTCATTTACAATACATTGTTTAATAAATTTATTTAATAAGTTTTTATGTTTACTAGGTAATTTTTCTATTAGATGTTCTATATATTTATTATATGATAAAAGTATAATATGTTTCATGCCATTAAATATACCATAAATAGTATCTTCTATATCTAAAGCTGTTTTAAACATTGTATCAATATCATGTATCTCTTCATTTAAAGGTGTTGTATATAGTTGATGTAATTGTGCTACAGCAGGATTTAATAAGTAATCAGATGACTTAATTAAAGACTCTACTTCCCCAATTTGTCTATTTGTTTTATTTACACCTCGTTTAATACCTTTTACATAATTTTCATAATTAGTTAAGTATTTATCGGAACTAAAAAAATTTGGTGCAGGTATAGGGTAAGGTTGTGTTTTATTCTCAAACCCAAATGTGGTATTCTTAAAAACATTTTGCATGTATTTAAAAACATTAATGTTCTTATCTTTTATCTTTAAGTAAAAGTTGTAGAATGTATTAAATGTCTTACTACCAAAGAAGTCTTTACAAATACTATCTCGTGATAAATTCTGTAACATTTTCTTTCTGTAGTACTCAGATAAATGCTTATGTCTATCTACGTCTTCATTACCATTTGATAATGTTAAATGTTGTATATATTTAGCATTCATGTGTGCTATAGCATATTGGTCATATAACTTACATAAGATATAAGCTTTATAAAAACCCTCAGGGTCATAAGACATATTAAAAATATCTTTAGTAGGGTAAGGTAAGCTACTATTATAAAAATTCATATCTGATATTATTTTCCTGTTTTTATCTTTACTAGCATTATATTGAACCATTTCTAATTTTGTTCTACGTTTATTTTCTTTTCTTTCATATACGTAGCTAGGAAAAAATCTATTTCGTAATTCAGTAGCGTATTCTAGATTAGAAGTAATAACATTATCATTTGTGTCATTAAAATGTAAGAGACTATCTGTATCATAATCTCTTACTAGTGATATAACAATACCACCTTTATTTCCTCTTTTAGAGACAACATTAATTTTGTTATCCTGCTCTAATCTTTTAAGGTTTTTAGATAAAGTAGAGACTGAGACATCTAGTTCTTCTGCTAACTCTTTTTTAGTAGCTATTTGATAAGTATTATTTTTTGATTTTTTTTCAATGTAATCATATAATCTTCTTTCTGTCTTAGTCACTACTCATACCTACTTTCCTAATTCTTTAATTTCAAATTTTTCTTCTTCATATATTTTTCTACGTTCATTAGAATGTTTATATAAAAACTTATGTGTCATGTCATTAAAATCAAATATCTGTGTTGTATTATCTTCTTTCTTTTTACGTAACGCACGACCTACACGTTGTAGTGTTTGTCGTAAAGATTTACCACCTGCACCTAGGATTAATGAACGAATACCACTGATATCAACACCCTCATCAATAAGGCTTGTAGCAATCATAACTTTAAGTTTACCATTACGCATTTCATCTAACTTTTGTTTACGCATATCCGACTCTATTTCACCATGTAAAAAGAAATTCTCTACACCCATTTCATTCAACATAGTGGATAGTATTTCACCATGCTCAACAAAATTAATAATAATAAGCGTAGCTTTATCTTGATTATACCACTTAGCTGTTAGTTTTGCAATAAGTTTATTTCTAAACTCGTTATGTACAATACCTTTATTATATGCATCCCTGTAATCCTTAATATTATCTATATCATCAGGGTTAGCAATAGGGATAATATTTATTGTAGGTCTAGCTGAATAGCCATTCTCGATTAAAAACTCATTAGATGTTCTTACAATAATATCTCCGAATAATGCTTGCATACGCATCCATAGTAGCTCATCTTTCATGTCTATGGAGCCTGTTAGTGCTATCCTGTATAGTGCATTCTCACAGGACATTAAACTTGTATACCATGAATCTGATTTACTGTGATGTGCTTCATCAACTATCATTACAGCTATAGAGTCTAGGAACTCACGCATTTTATGATATTTATCATAGCTCTTTTGATTTTTCTTTCTTACTTCTTTTTGGAAAATAACATTATGATTGTTTAATGCCATTAATACTTCAGCATCCGTCTTTGAATTATGATAAATATCTTGAAGTATATCAAGCACATTCTGCTCTACTTTAGTTTTAGGTGTTGTACTTTCTAATAATAACTTAAGTAACCTTTTTTGATTTTTACCACCTTCAAATTTAGGAAGTATCTCTTTAGCTATCTTTTTACTTAAGTTTACTTTAGCAGATACTTTTACTCCTTCTGTAGGGTCTTTTAAGTTAGAGTTAACAGTAGGAATCATAACTACAGTTACTTGTTTAACATCAAACTTACCAGAACCTACTTTACCTACTGGTATATTCAATCGTTCACTTAAACGGTCAGCAGATTGATTAAAAATCTCAGTAGAACTTGTAAAAAAAGCTACACGCTCTCCTTTTTCTAGTTGTGGTAATAGTTGGTCTATGATACCGCTAGCAACCTCTGTTTTCAATTATGTTACGATTAGGTTCGTTACTCCTAACCTTCTTGTAGTCTCCTACAAAGTTCAGACTATATCTTAACCATATCTAATGAGACTTAGGTTCTCCCTGTTTCCAATCACTTGATTGTACATAATAGTCGTTGCACCTTCCTAGTAATTTATTAAGCTTGGCTCATGATTGTCTCAAATGAGAGAGTTCCCATGAATTAAAGGAGTTACACTTATAATATTTCTACTATAAGGGGCAAAATTTACCTGCATTGGTAGCTTGCTTGCATATACCATTATAATTGACAAGACTATTAAACACAGCTTCATACTGATAGTCACGTAATGTAATCTTACCTACGTTATTATCTAGTAGTTGTATTTCATCATCAATATCTTCTTCAGCTAAAAAGCTTTCAGATTTTTCATCAATAATTTCGTATTGAAAGTTATGTCTTGATTGTAACTCACCTAGTAATGTTATCATCTTAGGTAACAACCCGCTAGGGAATTTGTTCTCAGCATAATCGTAGAAATCCACATAACCATCCCACACACCTCGTTTAAAAGCTAAGCTATGTTGATAGCCCTCTTTCTTAGCTCCTAACGTTTTATGAACACGCTTAAGTATGATATCTTTAATATACCCGTCACTTTCATCAAAATCTACATATGTATATATATTCTGTTGTCTTAACTGCATATATTCTCCTTTCTTTTTAGTCCTTTATTATCTTACCATATTTATTAAAGTTAGTCAAGAAAAAAAAAAGACTAGGAATTATCCTAGTCTATGGTAAAGAGATACCTACAACACGTGTAACATATTGGTCTTTATTATTATTTACTGCACTATCTTTAATTGTCCATGTATCACCAGTAATAGATAAAGTTACTCGATAGTACTCTACTCCAATATTAGAGTCTCCTGATACATAAGCTCCTGAACATGTGTAAATACCATCTCCATCTATATAAAACTTATGACATAAAGTACCTGTTTTATCCGTACCTTTTGTGTTTTGTAAGGCTCTGTATCTTGTGTATATCTCTACGTATTGGTAGTTAGATATAGAATCAGACATAGTTTCTTTTTTATTTGTATCTTTAAAGTTATGTGCTCCATTCCATAGTTCTTTAAAACCAGGTAATGTTTTTGTTGTGTTCCATGTATTACCATTTACGGAACCATTAATAGTTCTACCGTCAGTACCTATTGCGGTATATACACCATATAAATTAGTATAGTTGTTTGAGTCTGATATAAATATACCTCTGCAACTAACCGTAGACGGAGAGCCTGAAACACCACCTTGTATATAGAAAGTAAAAACAGTTTTACTTGTTTCTTCAATATGTTTAGCTATAGCTTGTTGGAATGTTATATTGTCTGATGTATATACGGATAATGAGTAATTATTGTTTTCCGCATCTCCATTTACATTAGATACAAGATACTTGCTTATCTTTTGTACGTCTAAATCAGTTCTCCAATCACCCCAATTGTCATACGATTTCTTAACATTAAGATATTCTTTTCCCGTGTTACTATCCGTTAATCTTAACATTCTATTATCATTACTGTCTATGGAAACTTGTAAGAATCCTTCATAAACACCACTAGGCATATCCGACATATTAGACACGTAATATGTACCTTGTGTATTAATATCAAAAGGACTTCCACCTATATGTGATGTATATTTATTATTAGGTAAACTTTGTACTACTTGCCATTGTGATGTTTGGTAGTTAGTAACGAATCGGTGCATCACTTTTGATTTACTGTCCTCCGTTGACAATGTATACAATATTTGTATTACTCTATCCTCAGTATCTAATGTTAATACTTGCAGTAATACATCTATATTTTCCATATCTGGTTTATCATACATAGTAGCCAATGTACGTGCTCCTATGTAATATAAACCTACTTTTTTAATGTCTCTTAAGTAATTGGTATAATCTATATCTTTAGCTAATCCTCTATCCGTTGTTAACTTAACTTTCTGTGCTTTACTTACGTCTAATTGTAAGTCTGTAGTTACTTCAAAGATATTTCTATCCTCAGTTAATACACTACCTATGTTATTAACTTGTTTTGTTAGGTCTGCTATTGTACTGTTTTCCGTAATAGGTGTAAAATTTAGTGCCATACTATTTATCCTTTCTTAGATAACAATTCTTGTAACATTCTTTTTAGTTCCTCTACTTCACTCTCTAATTTTTTGTAGTCTTCTTTAGGTACAAACTCTTCTGGTGGTTGGTATTCTATATCCTCTACACTCTTCGAGTTATCTTCAAAGCTTTTATTATATATTACTTCGTTAGTGTTCTTATAATACGCATACTTATTACTAACAAAATCAACAAAGAATCCATCAGGTAGAATAGACCTTGATACTTTTACATCACCATTGTTCTCTTCATATCCACCTACAATAGTATATCCCATAATATATTTATTATCTTTTAAGTGTAACACAATTTCGTCTTTACCAATGTCATACTTTATCATCTATAAAACCTCTTCTCTTAAATATATGTTAACCCTATTACTCTTAGTACTTCAATGTGACCTGTTTTATTGAATTGTGCGACTGTTGTGGTATTTCTATTTCCATCTAGGTTAATTGTTTTTGACATTTTAGCAGTGACGTTTATCTTATCAGTAATGTCACAATATCCTTCAAAGAAATCTACGCTAGAATTAGAGCCATCATTTACTAAGTTAAAGTCTCTAATTACAATACTAGATGTAGTAGCAGGGAATCTTCTAGTTGCATTATGTCCAGAACTTCTAGTCCAATATACTACGTCAATAAAATCATAGTTATATAACGAATCTGATAGATTTACTGTGTTTCCTGAAGCAAGGTCAAGCGTTCCTTCCCAAAGGCTATTACTAGCCATTTGAACTTTCATGGCTTGCCAACCATTATTATCTTTATTATATGTTAAAGAATATTTCTTGCCTTTAGTATCACTAAAATCCATTTGTATTACTTTATTTGTAGTGTTTATATTATTATTTTTATACGCTACTTGTATTGTGCCTTGTATTGTTTTATTACTAGGAGTTCCACTTATAGAACCATCACAGTAGAAGGTATAAAAACCTTGAGGTACAGACATTGCTAATTGTTGCAGACTTCTACCATTCGAGCTTTGGTAATCCCATACGTATTTATAGTAGTCATTACTATATGTATCTACGCTACTGTGTGATTGAAGCTCATCTTTACTTGTTGTCTCAGTCCAATTACTCCATATTTCATCATATTTTCTTTTATCATAAGTATGAGTAATAAAAGGAGTTACCGAGTATGATTTTTCTAATTTTGGTAGTGCATAATACACAATAGCTCCATTATTAGTAGAATTAGAGCAGTTAAATCTTAGTAGGGCTGATATATAATTAACCCTATCATTACTAGACTCTTGGTTATATGATTGTAAAGTAAAAGTAAAGGAGAACTTTTTCCACTCCGTAGATAAGTCATAATAGTTAACCTCTCTCCTACCTCCTGTGTATGGGTTATTGTCTTGATAAACATAATTATACCCAGCAATCTCAAAGTAGGGGAAATTACCATTTAACAAATTAGGGTCATTTACTTTAATATAAACAGACATTGTAACAGTATCCCCTACATATAGTTCGTCTCCTATTCTAAATCGTTTTGACATAACTGTAGGATATGATTCCCCTCCATCATCTAATTGAATAGTATTTTCACCCATATATCTAACTGTTGAGGTAGATGCATTATTAGTAAAACCCCAAAAAGATGTATTATCTATATAATCCGTTCTTATATTAGCTACATCCGTCATTGGTAATGTGAATAAACTATCTCTTAATAAGTTAGGTTGTTGGTCTTGGCGTGGTAACTTTCTAATCATTTTAAATGTTGAAGTAGAATTAATAGGATTAAATTCAGCTAAAGCTGAGGTACCATTTTTACTTTCCTTATAATTTATCCATCCTGTGTTTAAATTACTTTTAGGGGGATTTATGAGTGTTGCAAATTGAGTTGTGGACTCTGTTAAATTTTTTACATTAATTGTATTTCCTGAATCGTATAATGTACCTTCATCTAGTTTAAAACTAACCCAATCATAGACAGTACCATTATAATAAGTTTTCACAAACAATTTATTTGTGTTAGACGGGGCATAATATAACTTATAATAAGTACTACCCTTTTTATCTAAGTGTAAAAACCCTATATTACTTACACCTTGCGGGGTGTTTCTTGCTTGTGTTACAAAGTAGTCACCTGAGTCTTGTATGAAATTTAAAACATTATTTAAATCAGGATAACTAATCGTTTTTAAATCAGATAAGTTAACTTCTTCTTTTAAGTATTTACCCATTTCATTTACTTTAGGGTACATATCCTTTAATCTTTGTGATTCTGTTAGAGGTGTGTAGTTAAACGTCATGTGTGTAATCACCTTTCAATTTTTTAAGCTCATCAATAAGCTCATTAACTTCTTGTAGTTTATCTTTATATGTTTGTTCCATTTCTTTTATAGCTTTTTCTTCTACAGTAGGAATAAAGAGTTTAGCTTGTGAGTAAGGGTCTCTATATTCTGTAGGCATAATATCACTTCCTTAGTTAAATAAAAAGAGGGTATGAAACCCTCTTTAAACTTACTCATCTCTTGTTGTAACCATAAGTCTACGTACACGAGGTCTTAAGAAACTATTTTCAGTTGATAAGTCTAATCTTACTTGTAATTTGTTATTCTTAGTAGATTGATTTACTTTCTCATCAATAACATATCTATTAAAGTCTCTATTAGCCTTAACTACCTGAGCAGACTTAGTAAATGTTTTCCAAGTTTTACCATCATCGTCTGAATACTTAGGAATAACATTAGTGCCCTTAGGTAAGAATGCTTCATAACTAAATCTTATTGTGTTGTATGGAGCTTCTGTCATATCAATAGCTCTACCGATATATGAACCTTTTAACTCAGTTAAGAATGTAGTAAACGTTAAGTCATTAGAACTTAATAAAGGTGAAATATACTTATTAGACTCAAATGTAGCTTTTAATTTAACTTGTTTAGCTAAACCTAATACCTCTAAATCTTGGTAGTTACCAATAGGTTCCCATTTTAATTGGTCAAATGTAGTAGATGTAGCCATGTCATCTAAAATCATTTTAATTTCCCAAGTACAACCTGTTCTTTCAGGAGTTAAGTACGTAGACATTAAAACTAATCTATCTGCTGATACATTCTTAATAGGTTCAAATTCAATTGTAGCTGTTTCATTAAACTTAGAGGTATATACACCAAATTTTAAATCTGAATTTTGGTGTGGAGTCCAAGTACTAGCGTTAGATGAACTAAATAGAACGCCTTGTACATATGGATTACCGCTAATAACTTCATTAGGTTTATCAATCTTAGGTTTTGTTCTTGTTCCGACCCACATAGTATAATCACTATTTTCTGTAATAATGACAATAGCATACTCTTTACCTGCTTCAGCCATCATAGGGTCATCAAAGTATACTCTAGTTTCAGCACTAGCATTATTAGATACTTTAATATCATCTGAGTTGATTACTGTTTCAGCATATACCGTCTTGTTAGGGTAACCTGTATCTCCCATACCACGAATTTGTACAGTTACATTACTAGACTTATCTCCTTTACTAGCAAAGTATAAACCTAAAGAACTAATAGTTCTACTTTCATCATATTGGAATGATTGTGCTAATGGGTCTACTAAGTTTACTGTAACACGTGTTTTGATAATAACATCTTGTACAGTCTTCTTACGTCCTTGAGCTGTATATGTTGTAGCACTTGTAGAGTTAGCATTTTTCAATGTTACTTCTCTATTACCGCAACGAATACCTGCTGGAATTGTAAATGTACCTTTAGCTGTGCCTTTAGCATCAGACATAATTGTACCATCTTCAGAACCTTTTCTATAACCTGTTGCTGGTGTAATAGCACAACGAACACCATCAAATAAAATATACAAATTATTATCATTAGGATTTAAACCATTAACTTCGAAAGATACGTCACGAACACGAATAAATTCAATCATTTCTTCAAGTGTACGCTGTCCTCCAGCCTCTAATAGAGTACCTGTTCTACCATGTTCTCTATCATATGCGTATGACTTACCTTTCCACTCTTGTCCTTTATCTAACTGTAAGTTAGAATATAAGTAATGTTCTGTTTCTCCATAATAACTTTCATTATGTCTCCAGAATCTTTTCATTGTTACTTTTTTAGTTTTCTGTTCTGTGATTGTTACATTCTGAGTGTCTATCCAGTTATCTTCACTAGGAGTTAATTTTAACACACCTTGTTTATTTGGTATATTATAAGGGTTTACATTTAAAGTTTCGGATGCTTGTCCTTGATAAATTGTACGCTCTTCTGTAAATGGTGCGGAAATTAGTCGACCCCATATATGAGCTGTAGTGTCTCCTTGAATAATCTTAGGTTGGTTCACAGCTTCTTTATACGCTAGAGTAGCCTCTGCATCATCAAAACTAAATACAATACCAAAGTCAGGATGTGTAATGTCGGCTTTATCTAAAGATATAAAACCTTCACTAAATACAGAACGTAATGTTAATGGGTTTTGTTTTTCCATTGCACCATCATCCAAAGCATTAACAGCTTGATTATACTCTAAATTATCTACTCTAGTTTTTACTTTTTGTAAGTCTTCCATAGATAATCTAGTAATAGCATATGAAATACATACTGCTTCATTAGAGTCTGGTAATACTGTTACAGTACCTAATTGTAGGTTCTCAGGGTCTGTATTTAAAGGTGGTGTTACTAATCTCATAATATTAGGTTCACCTTTAAGAATAGCAATATCACCAAACTTATTAATAAAAACAGCATCTTTACGAGCTAAGTAGTAAGTATAGTCTACAAGTACAACACTTTGGTCAATAGGCTTAGTACCATTAACAGGTGTGAAATTAATAGACCAACGTTTACCTACTCCCTCACCTACTGTAGATACTTCATAATCTTTACCTACTTCCATCTTTCTGTTGTACTTATACGAAACATAATAAGATGTACCTCCATTAGGTTCTTGACCTGAAGGAGACCAGTCTATTGTTTGACCATCAGTAAGTCTATAGTCTTCTCCTTGTTTGTATTCTTTTGTTGTCTGACCTGGACTTGTTTCTGTCCATACTCTAACTACTTCAAAAGCTGTTTTATTAGATAAATAGTCTTGAGAATCTCCTGTTGAACTTCTTGTAACACGCTCTTTATCTACTAATACTTGCGCTGTTACACGTTGAACATCTTTTACAGGGGTATTAGCTAAAGTAATATTATTTGATGATTTATTAAATACAGTACTTTCATTTTCTGCTTTACCTAGTTCCCTTGACTTCTCTACACTAATTCTAGTAGAAACTGGTTTATCTACTTTATAACCTTTTACATATGCCTTACCAGCATCTACAACAACAGATACATGATTATCATCTTCGGCGTTTCCTTCTGAAAATAGCTCAAATCCACTAACTTTATATGAACCCGACTCATCATAAGTACGCTCTGCTAATACTTTGTTGATTTTATCCATCTCAGCATTAGTAGATTGGATATAGAGGTCTCCATCCATAAAAGTATAAATAGTAGCAGAAGTAGGGTCATTGACTGTTAAAGATAACTTCTCTTCTAGACGGTCTGCACCCTTAGAAAAATAACTAGGAACTCCGCTTGTTTGGTCTAATAAGCTATTATCTTCATCAGGTGTAATAATTCTTTCTGTTAGTTTAATACCTACTGTTTCTTTACCTACACCCGTAATTTTAACAGTGTCTTCACTACTATAGTAACGTATCTTACCATTTATATACACATAACCTGGGTTAACTTGTAGTACATTATCTTTAGTTAATGTAAAACCTAATCCTGATTGTTTATCCCCATCTTTAAAAATAGAATCCCCTAAATTTTTTAAGTAATATTGTTCAATAGACTGCATTTCATTTAGTTCTGATTGTTGTAGTGGTCTATCTGGATTAAATAGTACTCTTGTTCTATCTTTTGTAGGGTCAAATCTATCTAAGTATGGAGAACTTTTAAAATTAATTGCCATATATATTCAATTCTCCTTTTTAAACTTCAATGATAAAGCGCTCTTTTACAGTTGTTTGTTCACTTCTATTTTGGAATTGTTTATTATCATAAAATAATAAAGTTCCTGTAGATTGCACTTCACTAGGTAATAAGTTAAATTTAGAAATACTATCTTTAGCTAACAAATCCATAACAAATCCTACTTGTCTATACGTACCTAAGGGTAACTCATCTCCAACAATACTACTTTCTAAGTACACCCACTTAGCACCTTCAGCAACTGCATTAGCTGAGTCAATTTCTACCCATCGTTTATTACCATATGTAATTTCTTTTTTACTTTCATCACCCGTTGTTTTTGCAGGTCTAACTAATGCTACCTTAGTTGCTTTTTTATATCCGATAACTTCTTGTAATGATGTTGCTGTTTCTTCAGGTTGAGGTGGACTTGTTTCATTAGACCACGCTGTACTTTTACCAATTGTTAAATAAATAGAATCAGCCTTACTTACAATGTATTTAGCTAATTCTACATGTGAAGCATTTGTTGCTATAGCCATATTTTTTATTCCTTTCATGTCTAGTATTCTGTATTAATATAACAAGGTATACTATAATACGCATACCTTACTATATCATATTAATACTTTATTGTCAATATCTTTACTGTACTTCTGTGTATGTATCTATTACTTTAATTTTATTATCTACTGTGAATGTATCACTTGATAGTAACATATCCCGTAAGTCATAAATAAATCTATTTGAACCTAATGTAATATTCTCGTTATATAGAGTCGTAGACGTTAGCAATCTATCTACATCAGTATATCCTTGGTATATCTTAGGTGCTAATTTTATTACCTGTCCTGTTGAACTATCAAATACATTACCTTCACTATCAGTAAGTATGCTCATGCTACTTAATGTAGTGTTATATATCATATCTACCTCTTGCCATACAGCATTGAAATAGTTATTACTCATGTTAGAAATACTACCTTTTTTATTTGTTAAATTATTCAGGTTAGCATTCCATATAGTTTTAAGTATAACCCTAGAGAAAGGTGTAATACTTGAGTAATCTATTGTTTCTAAGCCATATAAATCTACTAGGTTATTAGGTGTTATTGTTTCACCTTGACTTAAATTACTTATTGTTTTTAGGTTTGTCCAATTATCCCCATAATAAGAATAACTTAGCTCAATATTTTTAAGAGGTGTTGTTGTATTTATTCCTATTGTTTGTATATCTGTTAATATGTTATCAAACACAATAGCTTTGTCTATAACATTAGTTACATCTTCAGGTGCTACCGTGTAGTCCTTCTTAGTAGCTCCTTCTTTTAGTTGAAGGTTTGTTACTTTTACCGTATTAGAAGCAATAGGTGTTTTAGAGGCAGTACCATCTGCTGTATATCTACCTGTGTAAACAACAAGTCTATGGTCTGTAATTGTAGGTGCTGTAAATGTGGTAGATACATCAATCTTATTACCTATCTTTCTTTGCATGCTTTTAACACCATTAGCAACAATACCTTTAGTACTACTATATAAATATATACCATGATTGTCAGAATATGTTTTTAAGTCCATATTAGCATCTGTGATTTCCATCTCGAATGACAAAGTATATACTTTTTGCGGTTCTAGTACTTTAGATAAATACGTTGAGTTATATAAGGTGTCAGACCATGATGAGATATAAAACTCTTTTGTGCTTACAACACCCTTGAATATACTACTATCACCTTTATATGATTGCAATAAGTTTCTATTAGTTGTATTTTTATATAAATCTATAGGTGTATTATTTTGTACCTCATTATTGCTGTTTTTACCTGTAATACTTACAATAGGTTTAGTTGAATCATAAGTAGCATGTAACCTTAAATATTTTATGGGTTGATATCCATTTTTATTAATTATGTCTCCATTTAATAATGAGGCTACTTTAAAGCCTTCAATATAAGTATCTTTAGTCAAATCTATGTAGTTTTCAACTAGTGCCTTAAAAGGTTTGATAGTATACACATCTTTTTTATAATTATAAAAATGTAAATCCATGTAGTTAATACTTATATCTTTTTGCTCATCTTTACCTATATTAACCTCTAATCTTGTAAATAAATTAAGGTCATCATTTAAGTAATCTCTTATATAACCTATGTTTACACCTATGTTTTTCTCGTAAAAAGATAGTTCTGTTTCTGATACAGTTAACCATTCATTAGTACGAAAATCAAATATTTGTAACTTAATAGGTAATGATTCATCAGGTGAAACTAAAGCTTTTGCAAAGAAATCAATTGTTAGTTCCCCTACAAAATCGGATATTTGTTTTTTAGCATTATCTCTAGTTATATCTATATTAGGTTTGTATCTACTGATAAACTCACCTACATTAAAGTTATTGTATAAATAAGACACACCAGAAGCAGTTTCCATTGATATATTTATATCATTAGTATTCTTTAAGGATGTATATAAGTAATAATCTAAAGGTGCTTCTTTTCCTTTATCATTTAAAGAAGCTATATGTGTGACGGCTGATGTACTAGTAGGTTCATATGCATATGTCGTAACATAAGCATAATTTATAAATCTACGTCCAATATTAGAAGAGCCTGATAGAATATCTTCACTATTTAATGTACTCTTATTTGTTCTGAACCTTGTTTTATCAGATTGTTCAGCTGTTGCTTCACTCATGTTTAAATGCCCATAGAAAGTTTCATCATAACCTAATAATCTATCTAAATCCGTATATGTTTCAATTTTAGGTAGATTTTTAAGCCATTTAACAACACCATCACCCTTTATGGTAGTAGCACCATCATAAGTTAAATATAACTTAACACCCGCGGGTTTAAATTCATTTATTACATCTATAATCTCTAAAGGAAAGTAACCATCAACAGAAACATTTATCACAGCAAATCTATAATAATAACCCATTAAATAATCTTCACCATTTAATTTTGATTTATTGGTATAGAATATATTTTTAAAAGGTTCATATACACTAACATTTATATTCTCATTATCTAAGTAATCTTTAATAGCACTAATAATAGCGTTGTTAGTTCCTCTTTTTAATAATAAGTATTTTATAATTCTTTTTCTATAGCTGTCATCATTCTCATTTATTCTTCTGTATACACCAAACCAATCCCCAAACTTATCTAAGTAATCTCCTGTGGTAGTTTTTAATGATGATTGAAGTTTGCTTTTAATGGTGTCTGACTCTATGTTGTTCATCTCATCATTAAGTGCTGTTATTAAAGCATAGTTAGGGTCTTGGTTATCTTTATTATTCTTATTTCTTCTTAATAAAGGGTGTAAGTTTCTTAAAAAATTAGCCATTGTTTACCCCCTTATATTAATTCTACCTTAATATCCCCTGCTCTAATAATACCTTTCGAAGATACTTCTATATTTGTAGATAAATTCTTAAATGCTACATCATAAATTAAATTATCATCTATATTCATAATAGCTTGAATTAAATCGTTAATAATTAAGTCATCAGAAGTAGTCAGACTATTTAGGTATCCTCTAATAACACTTTCAATATGTCTTTGTAATGTATCACCTATCCTAGCTTTATTAGATATTGTTACTACTGCAGACACATCTATTTCCTCTTTCTCTACGCCTACAACATCTAACTTTATACCACTAGGTCTGTAATCTTCTAATGCCGTTATTATGTCATTTTTTAGAGTAGCAGATAAATTTCCGTTTTTATCATGCGCATATACAGTAACATGACCTACTTCTTCATAAACATAAACACCATCAACATCAGGTACTTGTAATGTACCATATCTAATAGATTTATTAGTAGCTCTTCCTCTCGATTCTACAAACATATGGAACCTACGTTTAAAATCCTCTTGAGATTCTTCTTTTGTTCCTGTATTAAAGGAAGTCGGGTTTGTAATTGTACGAATTAAACTAGAGCCTGAGGCTATTGTATTAATGATATCTTCAGGTATATTACCTACAATACCAACTTCTTTACAGTAAACTTCTACTGTAATTTCAGTGGTTCCTTCTTCAGCATAGTAATCAACTAATGTTTCAAATTGTTGAGGGTATTCTTGCCTAGTAGATGAGAATGTAGTACCTGCAGGTATATACATTCTCATGTCTAAAGGTTGGTAAAATTGAATATCTACATTACCATAAGAACGCTTAGCTTTTCTTTTTTGAAAATCAAAAGCTTCAATAATCCCTTCTTGAATGCCCCAATTAATGTTTTCTCTTGTTAATATATAATACTGTTCTATTTCTAAAGCTACTGCTTCTAAAAGAGAGCGTACAGCTGAACCGGGTGTAAAGTCTGTTATTTTGCTTGTACCTTGTATCGTCTTATCCATTAACCTAGATAATATCTGTGTTAACTTTCTTGTTCTCATATAAATTTCCTTTCTTAGTCAAATAAAGCAAAGACACCTGAATCATCTTGACCTAATACAAAGTCTATAGATTCTTCTACGGACTTGATTTCTACATTAAATGACCCATAGTATTCATTACCTTTTATCTCCCAACCTTTTAAGTTAGCTGATTTAACTCTACTATCTGATGTTAGGGTTTTTAATACATCTACTTCAATTAACGTAGCTTGTTCAGGTATATTTAAACCAAATAAATTATGAATGTTAGAACCATATTCAGGATGTAATAATAAAGAACCTTTAGGTGTCAATAGTCTAGCTCTTAAAGATTGCTTAATGTTATCTATGCCTTTAACTATATCAAGGTCTCCTCTACCATCTGAAGATAGGGCTAATATTTCATCATCTGTTCCATGAGCGTCTATATACTCGTTATTATCCGTCATATTTAGGTCTCTACCTAAAGCTAATTCTACTAATACATCTTTGTCTCTTGATGTTATTTCTTTAGAAACCGAGTCTGTTAACTCAGAATCTAAAGGTATGATAATAATATCACCTTTAGTTATTAAGTGCTCGGGGTTCTGTTTCTTTTCTTCATCTGTATCTACAATATAAGGATATTGTAGATTGTTATGTTCTATTAAATCTAACCAGTAACTAACATCACCATAATACCTTTGTGATATAGCTTGTAAGGTTTCTTCTGATTGTACTTCATGCTTTCTAAATCTCATTATACCACCTCACTCTTAATTAGTGGTAGTTGTAATTCCAAAGAGCCAAAACATAAGTCTAAGTCTCTTAAATCGAGAACAATACTATTGTATTCTTCATAATCACTTAAATAGTCAGCTACGTAGTTAACATTACTTCTTACTATAGATACATCTTTTTCTGTTAAATATTTTAAGTATTCAGGACTTTCTACAAAGCAGTTTACAATAGCGTAAGCTTCCATTACGATAGATTGCATAATTAAATACATTCTAGGTGATTGTAACTTTAAACTTGTTTGTTCTACTTTATTAACTATTGTATTGTTGTTAAATGTTCTTTCTAAAGTAGGGATATCAGTAGACTTAATCTCTTTTAATTTTATTCTTGCAAGTTCACTTAGTTGTATTTGTGGTGTATAGAATTTAGAAACAAAAGGTACTTCCTCATCTAATAAGTTCATATGTGTGTAAGACATGTCTAACTCTAATCCATTTAAAAACCTTAATAATCCTTGTGGTTGAGGTATATAATTATTCATTACCTAGATACACCTCCATCACCGTATCCTATTTTAAGTGCCATATCATCAACAGTACTACTAAGACCATTAGTATTCTGTCTAGGGTTATATATACCTATATTACTCATACCGTCTCTATTACCTTCAGAACCACCTGTTCTTATGCCACTACCTCCTCTTAATGTTCCTGCCGTTCCATATCGTGAACCGCTACTACTAGAATTAGAAGAGCTTTGACTACTTTTATTTTCAAATTGTGATACTATTTGATTATTCTTGTTTCTTGTTTTTCGTGCGTTACTATCTAAATCATTAACACCCTCATCAACTCTTTGTTTAGCATTAGGTTTTACATTACCAAACTCAGCAGATGTTACGGAACCTCTATCTGCTTCAGCAAGGTTACCTATCACAACTAAAGTTATTTCATATCTATATAACAAGGATTCATCTTTAGACCTTGTTATTTTTAAACCTTGCGGTGCTAGATGTACTTTGTAATATTTATCATCAGTAAAGTTATAGAACTCTATATAAGCTCCTGCTACGCTACCATCTCCACCCTGCTTAGCGTATGCTTCTACTTGTTCTTGTAGTTCCTCTATTTTTTGTTTTCCTGTTTTAGTACCATCTACTTCTTTTACAGGTCTAAATCCAGTAGTACCAGAAAAAGTTATTGTCTCTATATCTTTACCATAGTCTTCAACAATAATGTCTGATTTAGTTTTAGTTATAGATGTTCTTTGTGGTGCATCTATTTCATAACTTTCAGGGTTTACTTTGAAACGGTACATATTATATTTACCGCTTGCTGTTGGAAAACGTAATGCAATACGTCTTATTGTATTCTTTCCATCTGATTGAGGCATAACTTACCACCTTTCTATATCGTATTATATCATATATAGTATTTAAATACAACTACTTTCTCAAGTTTAATATAACATGACATATATAAAAAAGCCCTATTAATAGGACTTTTAAACTTTTTTAAACTCTAATATTTTATTTGTTTCTACACCATCTATACCATATAAAATAAGCTTATTTATAATGTCACTTGTCATATCACCACTAGCATATATAGATAGGTTATTATTATGTGCTGTATTTACTGTATCTTGAGTGATACTAGTATATGGTAGTAGTACTCCATATATATTTGTATATATACCTTTGTTAATATCTGTACTTGTTAGATAGGAAGTATTATATAATACTGGTAAGTTAGAAAAATTATTTAATACTTCTTGTGTGATTGTTAAATCTTTAACTTTCAAATACACTTGATTCCTAGGTGCTCTTATACCAATTAAATTATATTTTTTCAGTAGTTCTACTATGTTTGCAGTAGTTGGTAAATTAATACTATATCTAATAGAATTTTTATATTTAGCTAATACATCTTCTAAAGATAAAATACTCTCACCATTCTTAGATGAAAATGACTTTATTTGTTGTAGAGTGTAATCAGACACATTACCTTTACCTGTTGTTATAGTATCTAATTTAGAATCATTAAGACAGACTAACTGATTGTCTTTAGTAACTTGTGTTGTCAAACTCAATAAATCAACATTAGAATTTACAAGTGTTTGTAGTTGCTTATCTGTTTGTTCGGATGCTGTACCTAATAACTCAGTGTTAGTAGGTGCTAAAGTAGTTTCTAATACTTCTATACTAAACATTGTATTATCTTGTAGTAATGTAAGGTTAATATCATTATCTTGTTGTACTTCTACTGTGAATGTATCTCCTTGTTTAACAGGTATAACATTTGTAATTATATTATCGTGTGTATTACCATTAGTTATAGTTTTGTATGTATTACTATTCTTCTTGACTATAATAGTTTTTACTTTATCTTGTAATATATCCCATTTAAGATTAATAGAAACTTTAACTTTAGATACACCTAACGGAATAACAAAAGCATCCTTAGTCTTATTTACAAACTCAGAATTATTAAAAACTATCTTATTCCATGTAATACGTGTAGGTGTGTATGGATAAATAGTAAGGTTACTATCTAATTGCAGTAATGAACCTAGATAATTACTACTAACACTTTGAGAACTATTATTAACATAGGTCTTACTTGATTTCTCTAATAAGGTATTATTAATGTTAGGTAATGTAATTGTATCTAGAGTATTCAATCTACTTTTTAACTCAGGTATTTCTTGGTTGTATTTATTTATCATAGTAGAAGCATCTTCATATAAGCCTTTAAATGTTTTGTCTCTAAACTCTTGAAACTGTGTAATAATACCCTCAGCTCTACTACTTACATTAGATATTTGAGATTTCATAGTCGTAACATCGCTACTTGCCTTACTAGAAACTTCTATAGATTTTTTAGTCTCTTGGATTAACTCCTCTAAGTTTTCTTTACCTACACCCTCAAGTAAGTAGTTAATGTCATCTAATTCTTTCTGTACTTCCTTAAGTCTATCTATAGACTCTGTAATGCTAGCATCTAACGTATCTAAAATTGGCTTATCATCTAAATATATACCTTTATCATTAAATTCAAACATATGCTTAGGGTTTTTTATGTAAAACACATTATTATCATTTATACCAAACTCTACCCATACTTGCGCTGAGTCTAATAATAGGTCATCATCTTGCTTTATAACTCTATAAGAACCATCGTGAGACATCTCTTGTGTTGTTCTTTTTTGTGTGCTTTTGTCTAATACTGAAGCTCTTACATCACCTTTTTCGGAAATAAATAAAGTTGTAACATGATTATCTTCAGAACCATCATCAAAGTATAGACCTTGGTGTTTAAATAACATGTTAGGTGCCTTTTGTATTCTAGGTTCTATTAAATTTTTGTTACTATAGTATGATGGAAATAAGTCTTGGTATTCAGTACCTGTATAAAAGTCTGAAGATAAAGGTTTTTCTTTATCACCTGAAGTAATGGATAAGAAAGATTTACCATTGAATGTTTTTATAGATGTACCTTCACCATCTTTATATGTATAAGTTAGGTCAGGTAATATAGAATACAAAGCACTACTATATTTATAAACATCATCATTACTCATTTTACCACCCTCTAAAGGATTCGTATTTATGAGTTGGTTTGCTTCTGTATTACCATAGATAGCTAGTATAATAGGGTAATTAATGTCATCATTAATAAATCCTAACAGTACAGTAGTTCCTTCCGTTATTAAAGTATTACTGCCATACACGCTACCTTCAGGTGTTCTTCCTACATAATCTTTAGGATAAGGAACAGCTAACTTGCCATCATCACTAGGGTTATGTCCTAATGTTAAGCTATTTATTTTAACTTCTACAGTTTGGTACTTATAATTTATTTTGCTTACTGTACCTAATAATAGACCTTTAACATTAAGTTCTTCTGAGTCTATCTTTTTTAAACTTCTACCTAAAGAAGATTGTAATCTTACCACCATGCTATATCATCCTCATCAAACCTCATAACCCTACCATTAAAGTCATCCCAATAATCGTCTAACTTATAGGTACTAATAGAGGTGTTATCTTTAGGAAATGTACCCATAAGAGAAATAAACTTCTTATCTCCTATGTATATCCCTATATTATCATCACTACGTCCAAAGAATAGTATATCACCTATTTTGAATTTGTCAATATCAACTTTATATTTGTGTCCTTTACCAAATATAGTATAAAAGCTTTTACCTGTGAAGAAGTAGTTAACTGTTAATGGATTTTTTAGCTCTACATTTCTCTTTTTATACATCCAATATAATAAGTTGTATGTATCTAAAGGTACTATATCCTTACTTTCAAAAGGGTTTTTATCCGTATTCCCTTTAAACATATACTGTATATGTTTATAATTATTTAAATTCTCTTTCAAGTCTAATGTTACTAATGTACTAACTGGAACATCTTCATCAAATATATGCTCATTATCCATGTAACTACCATACAGTATGTTCTGTAACTCATCAAAGTAATCTATAACAAGTACACCATTTCTTTCTACCATATGTACCATACAAGTTGATAATGCATCAGTAGGTACTGTGAGATTATCAGTAGTATAACTTATTTTTCTAAGTGTGAGTTTAGCTTCTATATCTGTACCATTATTAGTAAAACTATCATATGTTACCTGTCTAGGTGTTATACTTTGTATAACACCTACATATGGTCTAATATAAACAACTTTATTGTATACGTCTTCTGTAGTTATCTTTTTAACTTCCTTATCTTTTTCTTCAACCTTTTCTTTGGTTAATACTTCAAAATTGAAAAGATTATCTATAAATTTATCTATAACATCTTTAACTTGTTTATCCGTTGCCATATCAATTATCCTTTATCATATATAAATTGAGCACCTTTACCTATTGCTGAACTCATGTCTATTGTTCTTGTGCCGTAACCGTTAGGAGTTGCATAATTATGTTCTGATATAAATATACTAGCTCCACCGTCTAATACTTTTTCTACAAAAGCGACATGTCCATATTGTAAGCTTCCCCCAGGAGCACCTCTTTGCCATATGGCACAAGCCCCTTGTTTAGGAGTTCTTCCAACACCATAACCTGCACTTTTAGCACTGCCAATCCAGTCGGCGGCATCTCCCCATAAAGGCACAGGAATACCTAGCTCACCACGTCTATTATAGGCATACCATGTACATTGGTACTTATAATGCCTATTGCCTGGTTGAACAAAGTTGGGGTCATGTTTAGGCAACTTACCATTATATTTTTCTAGTGAAGCTAAGGTACCTCCATCTTGTGCGCCTCCGTCAGAATCTCCATCTTTATTTCCTTTTGTTTTCTTCTCGGCTACACCTTTTTCTTTTAATTCTTTAGATGTCTCTTCACCCATAAGACCACCCATAAAGTCAGATGACTGATTCCATAGTCCTTTAAACCTATGTTTGCTTCCTTCACCATCTTTTATAATAGCATCTTTTAGTCCTCTTGTTACTCCTATTGTAGTAAAGTATCCTTGTTTATAATCAAACTTATGTTCTACGGACTCTATGTAAAACTCCCATATATCCCCTCGTTGTTTATCTTTTATAAATAACCGTTTACCTAGGTCATACTTAGGGTCACCTAATACAACAATATTACCTGCATAAAAATTAGGGTTTGAGTGATACCAATTAAATAGCATTTTAGTAAATATAATTAAAGGGTCATCACTTGCGTCAGAACCTGTATCTATAGCAACATTAGCTACTCCTTCTACGGCTTTAAGATACTTATCATAAATATCACCTGTGGTACTTGTAGGTGGGTTACCTTTAAATCTAGTGTAATCCTCTAGTAGTTTCTTAGCATGTGTAGGATTACCATACTTATAATTCTTTGTAATATCATCTATTACAGCTTTTGTTGTTTTCTTATTTAAATCTTTATCATCAAAAGTTTCTTTCTTATTAAACTTTTCCGCTAATATAGACTTTAATTTTTCTTTTGTTAGTTTTGGTCTAGTATCAGATACTGACTCTCTTGAAGTATTGTTCTTTGTTATTTTTTCATATTCTTCCTTACTTAGATTACCTTTTTTTATATAAGATTCTAAAATACTCTTTACTTCAGGTTTAGTAATATTGTTGTATTTTGATGATATCTTACTAGAGTATTTATCTAATCCTTTAGATATAGACTCTCTACCATAGTTATTTAAATCTTTAAGTAGTCTGTCATAAGTTACTCGTTCATGACCGTTATCTCCACCTGTAGTTTCACTATCTTCTGTAGCACTACCACTCTTAGTTCCTATGTATAGGTTTTCTGTTTCATATTTAGAATACCCATATCTATCTACTAATTCTTGATGGAATTGAGGTTTAGAGAATACATCCCCTGTTAATTCTTTTAACATACCTGCTGGTTTTACTGTAAATATAGAGTATGTTTCTACGTCACTCTTACCAACATCTTCTTCTATAAAATCTTCCGTAGGTACAACTATATATTCTAATGCTTTCCATTCAGTTGGATTAAAAGGAGTTTTTCTTAATACTAGCTGTGCTTTACCTTTATGTTTATCTGAATTTCTAAAAAATAACTCATTAAAAGGTCTAGCAGTTACTAAGTCCATTAGCTGTTTTAATGTACCATCGAAGTTAGTAAAAGCGGAAACTTCAGTTAACTTTTCGTACTCATCCCAACTAGATAAATCATCATAATCTAAATAACTCTCTAGTGTGTTATACGTTTTATCTGTATAATTATATTTCATGTATGGGATAAATCGTTGTATAATACCTTGCATTACATCTTTAGCTGAACTACCTGTAAACTTAACTTGGTTCTCTCCATCACCATCAACTAACCAACCAACAGTTGGTAATACAGCTTGTACTTCTTGTATAACACCTAAACCAAATTTCATAAAAGGTTTTACAAAAGATTGACCTGTTATTCTAAACTGAACCTGGTCATTACTATAGCTTCCTACTTTAGAAACTTGAGATACCATACCTACTTGTATAAGTTTCTCTTTATTTCCTTCCTTATCTTTAGGGTCATTGTTAGGTGTAATATATATCTTAACAATATCATTTGCCATTACTAACTTATCCCAGTATGTATCCCCTGCCATTGTTATTTGGAATACTGCACTGTCATCTTCCATTGCATTTTTAGTTTGGAAGTTTATTAATTTTGAAGCAAACTGATTTCCTGTGTAATCTTTAGTATCTTCAAACCTTAATGTAAATGTATTGTCATCTGTTACTATCTCTATTCTTATCTTAGGTCGTCTAATTCTATACATATATGTACTTCCTTTATTTTTATATAAAGGGTAGTACTTAATAATACTACCCTAATAATTACGTTTATACGTGTTTGAGAAGATGTCTAAATCGTCACCAAAAGTAGACTTAATGCCTTTACCTATTTCTTCAGCATCCCTTTTGTCATTTGTTCCTGTAATGCTAACATTCACAGATACATTATTTTGAGATGCAGTACTTCCTGAAGCACTACTAAGTATCGGGTTTCTTAATACGGACGTATATGATGATGGTATAGCTCCACCGCCACCGCCACCGCCACCTGACTTACCATATTTGCTTACATAACTTTTAGCGTTATTTACTCGAGTACTCATCATAGCCTCTCCAGCACCCATACGCTCAAAACCTTGTGCAAAAGCTTTTGTATTTTTTTCTAAACTACCACTTTTACTCCATCCTGCATTTTTAAGCATATCACTATTTTGACCAGAACTCATTTCTTTCCATAAGAAATCTAACTGTGCGTCTAAGTCATTAGACTTCTTACCTTTAGATTTAGCAAAGCTATCAAGGTCTGATTTCCTACTACCTAACCATTGTGCAATGCCAAAAGCACCACTAGAGGCGTTCTTTGCATTAGGGTCAAGCCCTGATTCTTGCTTAAGGTTACCCATAACGGCACCTACTTGGTTATCGGATAAACCTTTACCTTTAAGGAATTTGTAAATCTTACCCGCACCTTCTCCATCTACATCGGAAGCTGAACCCCCTGAGTCAGAACTACTGTCTGAACCTCCTGAGTCTAGCGCTTTAGCATCTTCTATAATTTGTTGTGCTCTATCTAATAGGTTACTGTAAGTTTTTAAGTTTTTAGTTTCTGATTTATTATTCTTTTCTCTTAGTTGTTCTGTAGACATTTTCTGTTTTTTATTATTTGTACCATTTGTTAAAGTATATAAGTATTATAATTGTATTCTAAAAATTAGATTCTAATAATTGTTTTAATTTTCTACCTATTGCTTTCCCTGTTTCATTAGGGTTTTTACTTTTAGGTACTTCTATGTTATATTTAAGATTCTTTGGTTGATGGTCGTTTTTTAGAGCATGTCTAGGCATAACATCACTGCCTCCACCTCCGCCACCTATGAACTTGTCTGAACCTTTCATAATACTGGCAATCATAGTATCCCAATTACCTGCTGTTGCATATTCATGAACACCATTGTTGTGTCTCATATCGTGTAAGTTCTTTTGTCCTTTGTTGTAGAAGTTGTCTCTAATCCATTTAGCACCACCAACAATACCCAAACCATAGTTAAAACCATTATTAGGATTGTTATCAAAAGCACCTATACCGAACCAGTTACCTTTGTTAGGGTCTCCGCCTTTGGAAAGATTTGATGTTCCCCAGCCTGTCTCAACAGCACTATGTGCTACTAAATACCTTGGGTCAAGTCCTGACTCTTTACCTGCTTTCATATAAAGCTCACCTAAACCACGCATTTTAGAATTACTAGGTGCTTGAGACTCAATCCATTTATTTAACATTTCGGCGTTTACACCTTTAGCAGTTTTACCTAGGTCATGCTTAGTTACGTCTTTATCCGTAAAGTTTTTACCATCAAGGTAGTCAAGTGTTCCTCCTGATGAACTGTCGTTAGAACTACTACCTTTATTTGTTAGGTTATCTGCTAAATGGTCTAAGAAATGTGAGTATACTGTTACATTTCCTTCTCTAGAATCATTATTCTTTTCTCTTTTTTCTTCTGCTTTTTGCCTGTCTTTACTTTGTGATTTATCATTAATACCATAAGTTAAAACATATAAACAATAGTATACTTTCATATATAACCTATCGTATTAGTTATGTATATTTATTTAATAACAAGTTTACCTTACAAAATAAGAAAGGTTTATATGCAGAAGTAGAATACAAATTTTAATTATTTATATATTTTAACAATGTTTAAATATACACGCTACTGTATATTCTCTAGTTATTTCTAGACACTACCTTTCGGTACGTGCGCAGACTATTTGTTATCCCTATTAGTATAGGGTGAGTATTTTTCTTCTCCCAATAGCTTGGAGCTTTACTTCCGTCACCTATACGGAATAGTCGTTGAACGTGTTCCATAGACCTTTCAGGTCTTTAGGACTTTCGATGCTATACACCCATTGTACTTCTCCTTAGGATTTAACCTTAGAGTATCTAACTAATTTTTTCTGATTTCTCAACATTCAAGCTTAGTCTTTCGACTTACTTTGTAGTTTAGTTAGCTTTAGTAGTTTCATAGCAGTTAACACTCGGTACTTACAGATTGCTCTATAAGCAAGGCAATTAGTATATAACTAATTATGTTACCTTTTTTATTTTTCACTGTCTCGTCTAATTTAGAAGGGTTATCTGGTGTGAAGAAATCTGTTATGCCACCCCATAGTTTACCTACAGGAGAGTCTTGGAATTTATTCTTACCATCTTTATCTCCATTAGACCATAATTTCCAACCATCACTTGTCATAGAACCTTCCGCTGTTTTCGTAGCATAATCTCTTAAGCCGTCTCCATAACCTAGGTTTAATGGGTCTATGACACTTCCTATAGTATTACCAAATTTAGAAGAAGCTTCTTTAGTATCTCCTTGTATTAGAGAACTACCTATGTCAAAGGCTGATAGACCTGCGCCAATCCAACCTAGCTTACTTGTAAGACCTTTTAGTTTACCAAGACCGCCTGCATTAGCAGTAGGTGCTTGTGACATAAAACCTAAGTTAGAGTCTTTACCACTAAATTTACCTTTAGCTTTACCAAAAGCTCCTTTACCTTTGTTCCATACACCTTTACCTAGGTCTTTGGTTCTTCCCATATATTCACCAAAAGTAAAATCTCTTTTTCCAAAGGTATCAAATAAGGTTTTACCCATGCCTTTAGCAGTTTGTCCTGCTCCTTTTGCTTGGTCTTTAAATGGTCGGTCTCCACCTCTAGGGTTATCACCTAGTATAGTGTCAGCTAAGTTTTTAAGTCCTCCAAAGCGTCCACCACCGTTAGGATTACCACCACCAGTCTTACCTGTTGAACCTCCTTTACGGTTATTAAACCAATCTTTTAGTCCTTTTTGACCTTTACCTAATAAAGAACCACCAGCCATCATGGCAGTAGATTTAGCTAAAGATGCTACAAAGGCAAGTACTGCTCCTGAAGCTAGGTATAAAGGAGCTGGCAAGCTTGCCATAGCACTATGAACATCTCTAATAGGTTGAGCTAAGTCATAAATATCCTCAGCTTTATCATCTGTCTTAGCTTTGTTCTGGTCATTTCTACCTGCTTTAGACTCGGAATACTTATCCTTATTTTTATCTCCTGCTTTAGAGCCTTCTTGTTCCATGCTCTTAGCTTTACTAGCTAACTCTTCTTTAGATAGTTTACCTGAGGCATAAAGATTGTACAACTCATCTGTTTGCTCTTGTGTTAAGTTAGCTCCCATGCTTTCAAAGCCTTTTTTAGCTATGGCTTGTTTTTCTTTTGTTGTACTTCCTATATTATTAGCTTGGTCAAATATATTAACTAAGTTATTAGGGTCTGATATACCTTTATCCATTTGTGCTTGTAAGTCATGCATACCTTCTAATCCTTGGTACTTAGTACCCCATCCCATTGCTAATCTAGTATAAGAATTACCCATACCATTTTTAATACCTTGGTCAATACTACTTAAGGCTTGAGCTCCTTGTGCACCTTGTAGACCTTTACTACCTGTACCCGCTACTTGAGCTTGTAAAGAAGTAAGATTAGACATTTCCCCTTTAGATAATGTTCTACCTTGTCCTGACTGCTCGGCAATAGTACTTAAAGCTCTTAATTGCTCGTCTTGTCTACCAACCATATCAGATTCACGTATACCACCTAAGAAAGCATCTTGCATAGCTTTCATATTATCTGAGTTTACGCCACCTGTATGCATAAGTTGTGACATGGATTGCTGATAAGCTTCTTGGTCTTGTATACCTAATGAACGACCACCTACAGCTAACTGTTTAGCTCCTTTATACGTATCTGCATCGCTTTTATGTCCTATAGAACTTTCATATGACGTAGCCATTTTTAGCATGTCAGTTGAATTATAACCAAGCTTATTATCTATTGACAAATCTCCATATGTATTTCTTACTGCGTCTATATCCATATTATCTGAATTTTGTCCTAATGATGTTACCATAGGTCTATTTGCCTCGGATAAGGAGGCACCTTTCATATACATACCACCTGCAAGAGCAGTTACTGCCATAGTAGCATGTGCACCAATAGATGGTAATCTATCTTGGAACAATTTACCCATTGTTCCTCGTTGCTGTTCTATCTCACGCTGAGCAAACTGTTTTTTAGCACTATTTTTATAGTAGTTGATTGACTTGTCTAATTCAGCACCTGTTTTTCTATAAACTTCAGAAAGCTTTTCACTTTCATCAATCATCATTTTAATAGAAGCTGATTGTTTTTTATAATCCTCAGAACTTATTTCACCACGAGCTCTTTTGCCTACTAAATCTTGTTGTTGTTGTCTATAACCTCTATATCTATCTTGGTTTTCTTTTATTCTTCTATTGTTAGCTTCTCGTTGCTTTTCAAAAGTGTCTACTTTACCTAATTCAGAACGTACTCTAGCACCTTGGTCATAGGACATTCTATTAGAGCCTTCAGACCTAGATATATGACCTCTAACCATATTACGATTAGCTCTTAGTTGCTTTGTGTACTCCTTAGCTGAACTGGCATCTTTTACTAATTTATTATACTCTTCTGTAACTTGGTTCAGTGTTTTCATTTCTTTTATTCTGTTTGTTATATCTGAGTCTGAACCAATCTTTTGAGATGCTACTTTCTCTAGTTCTGTTTGTGTATTATTTAGTGTCTTATTAAGTTTACTATATACTTTCTCTACTTCAGGGTCAGGAGCTATACCCTTTGTAATATTATCTGTTTGTATGTCATTTAAAGCTTTCTTTAGGTCGTTTATATTCTTAGTTACATTCTGTGTAGAACTAATAGCCTCATCCATAGCTTTTGGTGATATTAAAGACTTATCACTTTGTTTATCCATAATGTTTTGTACAGATTTTACTTCTTTTGCTATTACTTTTAATTTCTCTAAGAAGTTTGTTAATGGTGCATCTATGTTTTTAGACTCTAACGCATCCATGTACATCTCTATAGCTTTTAAACTTTGTTCTAAGCTAGAACTATCACCAGTCAAGACCAACCTATAATCGTCATTCATTGCCAAACAGTATTCACCACCTAATCAAAAAATAAGGGTATTGGTGTTATACCATTACCCTACATGTACCAATCATCTACATCTTCTATTGCTTTGTTTATATCTTCTTGTGTTGTTTCTTTGTTATCAATACCTAAACTTTCATCAAGCTCTTTTTGTTTTTGTCTTATGTGTTCCATCATAGCTAAATGTTGAGTTGTTAATCCCTCGGTTTCATCTTCTAACTCAGCTTCAACTCGTCTATCTCTTTCTATCTTTTCTTTCTCACTTAAACTTTTATCTACTTGTGTATTTAAATCATCTAAGTCTAAGAAATCAGGAACAACATCAAATTCATCTGTCGGCGCTTCGAACCATGATGTGTCTACGTCTTCCGCTTTCATATCATAGTTTTTACCGTCTCTAGCTTCCATCATTTCTTTTGTATCTAAATTCATGTTAGCTATAATAAACTCTATTTGATAGTCATCTAAATCTTTAAAACGTTGTTCGGTAGGTAGCACATTAAACTCACGCATGATAGCCCATAAGTTTCTTGATAAAGGCTCTCTAGCTATATGTGAAAGTCCACCTAACCGTTCTATATCTTCATTTAACTTCTTTACGTTACTAGTAACGAAAGGACGTCATAAAGTCTAACCAATCATCCCACATAATAGCAAGTGGAGTTAGGTTATAAATCTCTTCAGGGTCTCTAAATTCTTTAGGTACTTCTACCCCTACTTCTTGTAGAGTAGCTAACATCTGATAAGCATTAATAACTTGGTCAGATTGATAAGCATCCATTCCACCTAAGTATGCAGAACGTAAAGCCATGATATTACCTTGTTCTCTAGCATTAGGTAATCTAATTTTTACTTTGAATTTTAAATCTAATTCTTCAAAGTTGTATTCTTTCTCCCATACATCATTAACACCTTTAATTACTTTGTTAATAACACGCTCTTTATCTTTTCGTTGCTGATATTTTAACTCATCAATTTCTTCAGGTGTCATATCTTTAATATCTTTTTGTTCTTTTTCCAATTCTTTATCCATCCTTTATTATTTTCTCATAATTAATATAACAGCTAACTTATGTTTTTTATACACATACAGTATAACATAATGTGGTTATAACTCCAAATTACTTAACATATTCAGCTACTCTTTTTTCAATTTCTTGTAACCTTTGTTCAATTGTTTCACTATTTTTAAGTAAGTAAATGTAGTAATCTTGAAGTGAGTCATAATATTCAAAATCAATCGTCAAAATCTCTTGACCCTCAAAATACTTTTTAGTGATTTTACCTGCTTGTTCCGTTAAGGTTTTAAACTTGTCAAGAATTTGATTGATTGCAATAGCAGTTGTCTTACTTGTTAAATCTACATTCTGTGGGAATTTATGTAACTCAATTTTCATTTCTTCATGGATAGCTCTTAATTTATTTGTCATTTTTTATTCTCCTCTTTATTAATGTAACCTTAGTATATATTATGTATTTACTTATGTCAATACTTTATTTTTAAATTTTTATCATAATAATCATTTAAATTTAATGTTTTGTGGTTATCTGTGACTCTGTTATAGTACATAGTTACAACTTCACCTGTTTCAACTTCTATAACTAAATATTGGTAAGATAATTTATTATTTACTTTTACTACATAAGGGTGTCTAACAACTACCCTACGTTGTATTTTGTTATTGTATAATGTTTCATTATATTCTATAATATCTAAGTTCTTATTATGTATATAATGAACAAACGCTTTAAAATTTACTGGTTTCTTACATTTACCTTTGAAGTGATTTGTTAACTTAAAGTAATTATTTTTATTATAAGCCTCTTTTAGTAAGTTCCTACATATAATTATTTCTTGATTAGTCATTTGTTTATAATGCTTCTTTACTTGCCTGTTTTTACTTGTTGTTCTTCTGCCTGAATAAAAAGTTTTCACAGTTCATCATCTCCTTATATAACTATAGTATTACAGTTATTTATAATTGTCAATACCTTTATGCTTATTTTTTCTAGAATATTTTGTTTTATCTTTTTTAATTCTTGTTGTTGGTTTAATTTTCCATGTTGCCCTTGAATTACTTACTTTACCTATTGTTTTCCTGTTTGTCATTTAGTACACCTCCTTTTATTTTTAATTATAATACAGTACTTCTAATAAAACAAGTATAAAAAAAGACCTAACTTTTATTGTTAGGTCTTAATACGAAATTTAAGTTCTAGCCTTATCTGATGCTGTCCTCTATACCCTATCTTTCGATATATTTTAAAGGGAGTAGACTATACCATAATCTTAATGTGTAACTAAGACTCACTTATTATAGTCGTTGAAGCTTCCCACTCTCGTAGGCTTGCCTGCGTATCATCTATTTTACTGTACTTAGGGTTTAACCTTATACTATACTAGATATTTTTTCTGATTTCTCAACATTCAAGCTTACCCTTTCAGGTTACTTTGTAGTTATCTAGTCTTTAAGACTTTCACGCAATTTAAAGTGTTTTCTATGCTTGTCACCAAACATAGCCTCTATTAGTTAAAGGTAGCTAAACTCAATTTCTTCTGTTACAATTTCATTTGTCTGCCAAGTCTCGTTGTAGTTGTTTGCTGAACCGTTTATACCCTATCTTTCGATATATTTTAAAGGGACTAGACTATACCATAATCTTAATATGTAACTAAGACTTACCTATTATAGTCGTTGAACCTTCTCCATTTTACAGGAGCTTGGATGCTAATTACCAATTATGTAGTACTTAGGATTTAACCTTATACCATCTAACTAATTTTTTCTGATTTCTCAACATTCAAGCCTAGTCTTTCGACTTACTTTGTAGTTTAGTTAGCTTTACGGTGTTCTAGCAATTTAAGGTATTATTCAATGCACATCACTGTACAAGGGGTCTATTTAGTTAAACCATGGTAACTAATAATAACTTGTTTCGTTAAGTTATCTACTACTAAGATATCAATAATATCTTTCTTAAGAATCTCTTCACCAAGTGAAGCATATCCTAAATCTGCGAAGTTTTCTTTTTTCATACGTAAACGTTCTAGTGTAATTGTACCAGCATATTTTAAGTAAACATGCTCTTGTGGCATAATACTACCAATTTCGTATACACCAGTAGTTCCGTATTCACGTTGACCTTTAGCAGATTGTGCTCTTCCAACTGGTTTACCTTTTACCATTAACATAACGGTATTACCAGTATGGACACTTTGCTTAGCCTCCGATGCCATATTAATTCACTCTCCTATTAAATTAAATAGGAGTACCTAAACTAGGTACTCCTTGCCCTAGTTTAGGCTCTTAATGTTTGTTGTTGGTATACCAAGCTAACAGAAATTTTCTTGAAGCTTCTGATAGGGTATACAACCATTGAAATTCTAGCCTCATTACCTTCTACAATAACTTGTACGTCTTCAGGTGGGAAGTCTTGAATTTCGTTATCTCGTTTCTTGCGTCCTAAGAATGACTGTACAAAGTCTTTGATAATTGAAGCACTTGTATTGATAGTACGAGTACCAATAAAGTTATTTTCAAGCTCAAGTTTTAACTCAGAACATAAGAAGTCATTTGCTTCCCCAACAGCCATTTCTGACTTAACAGGGTCATTTTTATCATTAAATGTCGTAACATCGTCTGTTAATCTAAAGAATGTATTAGCTCTATTACGAACATATTGTACGGTGATAATACCGTTTTCATTTAACTCATCTAAGTCTAATGATTCATATAATTGGTCTACATTATTAATACGTAGTTGCTTAAAGGTAATAGACTCACCTATAGCTAAACCACTTACCAAACCTCCGATAGCAGAAGCTACCATATAAGCTGGTACATGTAACTTACGACCATTGTCCATTGTGAATATACCTGAGTTAGCTACTAAAGCAACTCGTGGGCTAGATAATGATGATTGACGACCAAACAACTGTTCTTTCGTTTCATTAAATCCTCCACCTAGAATAGCACGCATAGGTTCACCTGCATCAGAACGTTCTTTAACAAAAGAAGCTACTTCTGCATGAACAGATTGTTTAGAAGATAGTGGTACCATGTAGTATCCACCTTCATGTGCAAATTTTTCGATTTTATCCGCCCATGTAGCAGGAGGTTCACCATTTGTACCACCTGAAAGTTTTGTTAATTCAAAAGGTGTGATTTCTTGAATTGGGGACACAGCTGTTACAGTAGCAGATTCTTCATGTGCGTCTACTTCTACGTTTTTAGGTGCTTGTTCAGATACTAATCGTTCAAATGACACAAGTCCGTTATAGGCTGTTTGTTTCTCTAAATCACCAAATACTGCTTTTACATACTCAGCTTTATCCTTAATGTTAACATCTGTCATAGGGTCTAATAAGTAAGACTCTAAGTTCTTATCTCCAAAAGGTGATAACTTAGCTTCAAAATCAGGTAATTGGTTAATATCGTTAATGATGGCATTAGTAGTAGCGTAAGCTCCTCCTGTTAAGTCATAAGACTTAACTTCTGTGCTATTAGCTTTTAATACTAATCTTTTTGCTTTTTGTGTTTCTTTATCGTGCTCTACAGAAAAAGTAGCTGTACTTTCACTACCTTTATATTTGATAGTGAAGATATTACCAATATTATCATATGTTTCATTAAATCTATCATCTTGGAAGATTAAATGTAAACGTAATGAATTACTGATTGTATTTTTTTCTAATCCTACTTGAATGTTGTTAGCTACGTTACCATAAATCTGTGAAGTAACTTTCAATCCGCCTACTTCAGCTGTAGCTGGTTTAGCATCCTCTACACGCATAGCAAAAATCTTACCTGCTGTGTATTGTGGATTAGAACCCCAAGCTAATTCAATTGCATCAAGTAATTCACCTGAGCGGAATAGTCTTTTAGCTTGTGCGTAGTTTCTTAATTCATATACGGTATCAGGTTTACCACCTTCAGCTTGTCCAATTAAACATAAAATCTTTTCACTGGAGCTAGCTGATTTACCGATACCTGTACTGTCTACATTAATGACTGCATGTGGACGAGTGACAGGTCTTCGTGGAAACGGTTCAACTGCCATGTATAATTCTCCTATCTATATATTAAATTTCTAATTCTCTACCTAAATACTTTTCTAAAAATGGAATAAAGTCTTTTTCATTGAACAGGTAGTGTTTACCTTCCATGTAGGCTTTAAAACCTGCTACCTGTGACTCTTTCATATTAAACAAGGTCTGTGCTGTTTTTAAAAATGTATCTATATGTACATAACCTGTAAAGGTTTTACCTTTAGGTGTTTTCTTAACCATTATCTTTTTGCTCCTTTATTCTTGAAAGTAATCTTATTAATATCTTGTGTTATTGTATAATCTAAATCTAATGAACTTGTGTATTTAATTATAGTAGGTCTACCAAAGATAGATGACTCACCGTCTTGGAATATAGGTGCGATATCTCCAAATGCAAGATTTTGTAGCTGGAATGTTTGTTGTTCTTCTATACTGTCTCTCATAGATATCAATATCATTTTTAATACGGCATCTAAACATCTAGCAACATCTACATTATACGACATACCCACAATTGTTACTTGTTCTTCTATGGTAATACCTTTTACTAACCCTTTACTATCATTTGTTTTTTCTACATATACAATATTTGCGTTGTAGCCTTCATAAGTCTCATTGTTAGTATAATTAAAAGATACAGTGTTATCTGATACTTTAACATCATCGTAAGAATCAAACGCTATGTCTTCTACTCTTATTACATTAGAAATAGGTTTAGATACATGAAATACTAAACGATTACCTTCTCTTTTAGCTACTGATTGTTCACTATATGTGTTACCCGAAGCTTCTAGATAAGACCCTTGTATACTACCTAAAGAGTTTTTAACCTCTTGACCTTGCCCTAGTTGTATTAGGTAATGAGCTTCGTAGTTGTTTTTAAAGCTAGGGAAATTGAACCCTACTGTTACTTCGTGCTTTGCGTTCTTACCACAAAAAGCCTCTTTGAACATTTCCCTAGTTTGATAATCAAAGTCTTTTAAAACTTCATCTATAATATAACAATTACTTAGTACTGTATGTAATCTGGGCTTTATTTGCTCTAATAAATATGAGTCTACTGATGTTATTGCCATCCTACTTCCATAACCTTTCTACATTAAATTCTTAATCTTCCAGTTCATCAGATTTCTAACATACTTTAATGTTGTTTTAGAGAAGTTGTTTTCATTAACCTTATCTCTATTTAATATCCATGAACTTGCAGGGGATTTACTAGATACTGTTCTAAACATAAAGTAACTAGATTTTTTACCATTTCTTACTTTAGTAATTCTACTTGATTTACTAGCAGGCTTTAGTGATGGGTGACTAATATTACTTCGTCTACCTTCTAGATAATCAGTAAGAGTAGATACTGAATTACTTGAACTGTCTATTTTTAAAGACCTTAAGTCTTGGTATGTTTTATTATTCATCTTACTTGTTTTTATTCTTATAGGCACCGTTAGATACCAACCACCATCTTTAGTCCTTTTCTTTTTAGATGAATGAGCAAAAGCTTTCTTAAGGTCTATTACACCTTGCTTCTCTAGCTTTTTCTCAGTTATTTGTAGATAAGTAGGCATGCGTTTGACACTTACATTATCTACTTGTAATGCTGTAGCTTGTAATCTATCTAAAATATCAGAACGCATAGCATCTACTGTTCTCTTACCTATATTTTTATAGTTCTTGTCTCTAAATAACTTAGGTCTAGTTGCTTTTATAGGCATTATAGCATTCCTCCAAAGAAACCACCTGAATGATTATCTTTAGATTCTTTTTTAGGGTCTTCTACCTGTATCTCTAAGTCCTCTTCTATACCATCATTAACTTTAAATGGCTCAGGTAGTACAATAACGTCTTCCCTTTTTAATAATAGCTTCTGAGGTAAATTTTCAAACTTTGTATTAGGTTGATTAAATTTAGTATATTGGTATCGACTTTCTTTTAATATATCTGATACTACATATCTAAGTACCATTAAAATATTTAAGGATATAGTTTTGTTTTCAAACTTAGCGTCCATGAATAATCTATTATTCTCTATATTATAGTCATCTTCATAAACATTACCATCGTTAGATGTAATAAAAGTTACTTCTTTGACATCATAATACAAAGGAATACCTTTTTGTATACGCTCTTTAGTAACATGGTATATAAGTTGTTGTGGCATCAATACTTCAGGAACAGTAAACCTGTCTCTATAAGATACTCGTTTTTCTAGTTGTGTAGTTCCTATAGCTGTACCAGTATCTAAAATTCCTATATCTAAATTGTTAGTTCCTTTTTCTTGAGATTGAATAGCCATTATTGTCTCTTTAGGAGGTAAATAGGCAATACCTTTACCGTGACACCTAGGACAATCTACTCTAGGATGTCCTGTGTCAGGGTTAAGGCAAGGACAAAAGTAAGCTCTTTCCCACAGTACCTTTATACCTCTATCATTGACAAATCTTCTCATATCCTTAGTGTCAAACTCTAGTCTAGCTGTAGATAACTTTTGTTCTTGTTCATCTGCTTGTGTTGTAGATGTATACATAGTAGACTTATTAATTATATTAGAAGTATTATTATTAGTACCTATCATAAAAGGTTTTTGCATTTAATATCTCCTTCCTACTATATGCCTATCATATTGGAGCCAAAGTAAGATTTTAACCCAGCTAATAGCTCTTTTATATCTTCATTGATTTGTAGTATTTGAGCACTTGCTCCACCATACATAGCAGATTGTGTAGTACCTATTGTTTCTGTAATACCATCTACATCTAGAGTTTTGTTTGCTATTCCTGCACCGATAATGAGATTACCATATGTTAATTAAATTAACTTCCTAGGAAGTTTTCATTTAATTAACATTGTTTCCTTACTTACGCTACTAAATAAGTCTAGGTCAATTCCTAGCACTCCTTTTCAAGACGTGTGCAGACTATTTGTTATCCCTAAGACTAGGGTAAAGATTTTTCTTCTCCCAATCACTTGGAGCTTTACTTCTGTCGTCTATACAGAATAGTCGTTGAACGTATTCCTTATCTATTGACTTAGGACTTTCGATGCTAAACTTCCATTGCTCTTCTCTTTAGGATTTAACCTTAGAGTATCTAACTAATTTTTTCTGATTTCTCAACATTCAAGCTTAGTCTTTCGACTTACTTTGTAGTTTAGTTAGCTTTAGGATTTCTTAGCAGTTAACCTTTGAAAATGTGCAACTTACGCTACACACAGGGTAATATCATCGTAACCCCATATTTGGTAAATTTCTTTTAGTGCATATTTAATAACTAATTGCTCTAATTCTGGTGGTACTTCCCATGGTTTAGTTCTACCTGCTCTTTGTCTAGGTAACATACCACTAATATAATCTAATGTAATCATTTGAGGTGCAAAAGTTGCTCCACTTGGTGGGTACATTCCTGCTAATTGAGGGTATCCACTGAATACAGCATCGTAAGACATAGATTGACCCGTCTGCATTAAAGCTGTAGGGAATAACTGTACGTGACCTGCTAAATGCTCCACTTTCCACCAGTTAGCTGGATAATCATACATAGGTCTACCATTAAATTGTAGTTGTAAATTTTCTACCTGTAATATAGGTTTTTTATATGCGTGTACAAACATATAACTATTAAATTCTGTTTCGTAGTAATCTCTCATTTCATGTTGTAAGTCAGGTAAAATAGATATATCTAAAGCTCTTTCCGCTTTACCTATAGCTCTTTCTAATATATGATTATAAAAATCATCACCCATAGGTTGTCCTGTATCGGGGTTTTGTACTGTTATACCAAACATATAGGCTTTCACAGCATCTGCTGACCAACCATAATCAGCTAGAGTAATACTATCTAATTCTCTTTTATCTATATGTTTTGGGTTTCCAGATGGGTGATAAGGATACTCATATGATAAAGAGCTTTCGTAAGGGTCTAAACTACCACCAAACATACTGTTTACCATTTTATCAACCTACTTATCTTCTTTTTTAGTTGTTTTTTTAGTTGGTTTCTTCTCTTCTTTTTCTTCCTTAGGCTTTACTTCTTTCTTTGTTGTTTTCTTGTCTTCCATATGTGTAAAACCTGGTAAATTAGCAAAATCTTTTTCTTGTTTAGCAGTTAGTCCTTTAACTACGCCTTTATCGTCTACTTCTACTTGACCATGTACAGTAGCCATTTTAATATTTTTTAATTTATAAGTTAACATTGATTTTTAAATTCCTTTCTTGTATACTATAAGTAGTAATAAAAAAGGAGCAACCCTTAGGTATACTCCTTATTCTATTGTATTCAATTTTTAATTGTATTTACTATTTTAATGCAAGGTAACTTACGTTTTTAATACGAGCCCATTTTTTAGGAGCACGTAACGCTAAAGCACCATACCATAATACTGCAAATGTAATACTAGCATTAATTTGAGCTAATGGTAATTTCATCATTGGTAATAACTCGAACAAGTGTAATACTTGTGGTGACATTTCACCAACGAATACGTCTGCTGTTTCAGGTAATGTTTCGTTTTTATCAACGAATACTAAAGAACCATCTTCTTGTGCATCTTTAAGTGCTACACGTTTAATTAAGTAGTACATACCTGTTTCTTTACCTTGACGGTAAATAGATACGAATTGTGGGCTTTGTTGGTACATAGAGTTAACAGTAATCTTTAATTCTACTCCATCTGTAGCATTTGTTACTGTAGCAACTTGTGCTTCTGATGGTGCTGATTCAGCTTCATCAGAGTGAACAACTACTTTATAAGATAAACCTGCACGGTCTTCTTCTTTAGTAAATTTACCTTTTTGGTTTGTTTTTACTTCAGCTTTTACTGTAGCTGGTTGTGGTGCATTTGGTTGTGGGATTAAAGTTTCATCTAGGATTAATTCATTTTCCATTACAGTAGAACCATGTAATCTAATGAATCCACGAGATGAATAGAATCCGTTAACACTGAAACCAGTATTTACATTACCACTATTGTCTTGCATTAATTGCATTTGTCGACCTAAAATATTAGTAACAAAGTCAGAATGTACACCGATAGGCATGTAAGCATCTGTAGCTGTACCAAAACCTTTACCGATTTTAACTGAAGCTAGGTTTAATAATTTCTCATCTAAGTGAGCGCCTTTAGCGTCGATAACGTTATCAGCATCAATTAATTTAGCTAGTCCATCAAATTCTAGTCCTTCTCCACCAACTTCAGAAGTTAATGAAGCATCACCATAGAATGAAGCCCATTCAATTGTTTTAGCAACAACTGAGATAGCATCTTCAGTCAAGATTTGACCAGGGTCAGCAATGTTATTTACTAAACTAGATGCCAATGACATATTTTTAGTATCAGAAATGTATTTCATTGTAACGGTCTTTTGACGGATATTAGGGTCTGAAACTGACGCTACTCCGATTTCACGTACAAAACGAGAATGACCTACTTTACCGTGACGTAAGAAAACATCATATTTAATTACTGTTGATTCAGCTGGTCTACGTGCAACATCACGGTAAAATACTAAATCATTATTTCCCCATGTAAGCATAGTGATTTGGTCGTCTAAAATTTCACGACGTAAAGCACCTGCATCCACTTGTGTTTCAGGAGTGATACCATATCCAGTTTGGAAGGATTTCGATAATTTTTCTTGTAATTCATCAGCAACTGCATGTTGCTTTTTTGAAAGTTCATTTTGGTTCATTTATATATATCACCTTTCATATATGCTCTTTTTTTTTATTGTTTTATTTTACACACTATAATATAACACAACTTTGTTTCTTAATTAAAGATTAGCAAATTCTTTTACAATATTAAAGTCTTTTTCACTTGCTTGCTCTGGATTGTTGCGGATATTTAAGTAAGCTTGATAAGCATTCAATACTTCTGAACGATTCGTATGTGGGTTTTGAGATTTTTCTTTATAGGTACTCATGAATTTTTCACGGTCTTCTACAGATAAGTCTCTACTTTCTTCTTTAACTTCTACTTCTTGTTCTTCTTTATCTTCTGTAGTTTCTGCTTGTTCTTCTGTTTGTACTGATTTAGCTACATAACCAACTACATCTTGTTCATTCGAAGTGTTATTAGTCGTTACGGATTTTTCTACTGCTTCTTCTTTATCTTCTTGGTTGCTCTCAACTGATTTAGAAACTTCTTCATTAGAATTAATTTTATCAGTTAAAGCTTGAATAGATTTAGTTACTTCTTCTAAATCTGATTTAGTCACATATTGTTCATTTTCTTTTTTAATGTCTTGGAATGATTTCAAGATAGTACGGAAACCATCTACAATATCTTTATCAGAAATAGATTTAGATGTTTTTTCTTCCTCTTCTTCATCTTTTTCTTCTTTTTTGTCTTTTTTATTTTTTCGTTTCTCGTTGTCTTTGTCTTCTGTTTTAGTATCTTTTTTATCTACAGGGTCTTTCGACTCCTTAGCTGACTTAGATACTTCTTCTTCTAGATTTTCTTCTTGTTCATGTGCTTCTTTAGCATCTTCTTCAGTAACCTTTGCAGGTTCTTGTGGTTCTTCTTTAGCTTCTGCTACTTGCTCTTCTGTAGCTTCTACTTCATTTTTAATTTCTTCTTTTTCTTCTGTTTTAGTGTCTTCTGTTTTAGTGTCTTCTGTTTTATCTTCTTTTACTTCTTCTTTAGACTCTTCTACAGATTTTGATACTTCTTCTTTGTCTAAGTTATCATATTCTTGTAGAATATTTTGTAATTCCGTAGGCATATAATATAATCCCCTATTCTAAATTTTTTTTATTAATACTCATAACTGCTATCTCAGCATCTTTTCTTGATAGTCCTTTGGCTAATTGTAATGTAATAACTGATTCTTCATAACCCATATTATTAGATTTAGTTAAGTCCTCTACTACATTATTCCAAATATCATTATACTCTTTAACATCTTTAATTTTTGTTACATAGGTTAAATTAGTAATAGAGCTTGCTAATGACTCTTTACGTAAGGCTCCTGCATCTACTTGTGTGTCTGGTGTTGTTTCCGTTCCAGTAAGGAATGATTTAACAAAACTCTCCCATGTAGCTTCAGGATTAGCTGGGTTTTTTACTAGTGCTACCCCTGTAATCATAAGTTCATCAACAATTCTATTGTCATTTATGTTACGTTTCTTAACAGCGCCTTCTATAGAAAACCCTAAACGTCTACCACTACCTGACTTTTCTAGTTTCTCAGCTAGGTCTAACATTTTTATAACATTTTCATCATCTTTCCATAGCTTAGCTTCTATAAATAAACCTTTTTCTAAATCAACATAACAGTTATCTGTAGGTATACCTACTACATTATCTTGTTGATGTTCGTAGTTAATATATCCATTTTTTTTAAAGTATTCTATATCAATACCTTTTGGATTTATAATGTCATTCTGCAAATCAACAGCTGGTGTGGAAGCCCAACCAGATACGATAGAATATTTATTTGTATCATCTTCCGTATCTATGGATTTCTTTAAGTCCATAGGAACAAAAGCATTAAATTTCATTTCTTCCAAAGTGATTATACACCTCACTTAATTGTTATTTTATATGTACATACATAATATAACAAAAAGTATATCATCAACATTATTCATTACTACACACATAGTATAGCATAAAATATTTATAGCTCCAAATTAAAAAATAACAACCTAAGTATTAATTAGGTTGTTAGTATTATTTACATAAAGTCGGAAGATTTCTCACCTTTTCTTCCTTGTCCTTTATTTGATGTTTGTGTTCTATATACGTTATCATCACCTTTTAACTGATTATCTGTTCCTACCTCTTGATTAGTTGTTTCTTGTTTACTATCATCAGTAGGCTCATCAGTTTGTGGTTGTGTATAGCTCATAAGTAATTGAAGTCTTTCTTTTTGTTTAGTATCTAAATATTGGTCTTTTTGTATTTCTTGTGCTGTACTTTGTAAAAATGCTGAATCAAGAATTACATCTCCACCATCTATTGGTTTCAATCCTTGTTCTTCCCTTGCTTCATTTACAGTTTTATATACTTGTACTTCTTTTTGTAAGATACTAAGCTTATCTAATTCAGACTTAGTATCTCCTCCAACAAATTGGAAAGTATACTTATCACCAAATTCAGATATAATGTGTCTATTAATTAATTCTTCTATAAATCTTAATAGAGGCTGTAAACCTTTATTCATAGACTGTTGTTGTTTCTTAGCAGGGTCTGACTCATTCAATGTAGAACCGCCTTTTGACCCTGTGGCTCCTCCTCCTCTATTAGGGAATCCTATTTCAGAAGGGTCTATACCATACAAAGCAGAAATAATATTGATTAAAAAGTTTAACCATTTCTCAAATTGCATATCATTTGCTGTTGGTGTCATATTAACAAACTTAACATCATCAGCCATCATAACAGGCACCTGCCAGCTACCATTTATACCTGAAAAACTAGATTTCCATTCTCTTTTAAAATTTTCTAACGCATGTTGAGATTGCTGTTGGTCAGCTCTAATCTGTAATATGCCCCGAGTAGTACCATGAGTTAAAATTTATAAATAATTATATATTTTATTCCTTATTCTGTAACTGTTTTTGAATAATCCATTCATTCATTCACTAACTAAGTTAGTTACTTTTAATATTCTACTAACTAGATACTCCAAAGGCTTAAACTCCCGTTCATGGAACGGTACATATAATATTACTATTGTTGTTTCTCAATAATATTATTTCGATACCAATTGGAGTATCTATAGTTCTTTAAGTTAATACTAGCGTTTAAATCTCTATCTAGATTATGATTACAGTTTTTACATTTAAAAGTATGATAACCCGACTTAATAGTTGTTTTTTGTTTACCAGTTACTCTAGTTTCACAATTACTACATAACTGACTAGAAGGGTACCATCTATTAGCAACAGTTAGTAGAATACCTCTATCTTTACACTTATATGAAAGTATTTGTCTTATAGCAAAGAACTTAGCATATTGTATTTCATGTCTTCTCCATTTATCTTTTAACATTTCTTTAACATGTAAATCTTCTATAACTATTTCTTTCGGTAACATTTCAACTATTTTTTTAGTTTCTGTGTGTATATGATTATTTCTTATACTTTTAAGTTTTCTTCTTATGTGTCTTATTTTACGTTCTAACTTAATAATATTTTTAGTTTTAACATATTTATTACCTTGTTTATTCATGTCATATTTTCTAAAAACCTGTTTTTGTAATCGTCGTTCTCTTTTTTCTAGTATTAAAACTTTTCTATCTAAATTAATATTTCTGACTTTAATACCATTTGAACAAGTCATTAATGTTCTTAATCCTAAATCTATACCTATAATTTCATCAGTTAACTCTCTTGGTTTTTGATTTGTAACTAAGTTATCTTTATATAACAATGAAATATACCAGTACTTACCATCATGTCTTATTACAGGAGAATAAAATTTATCTTTATCCTCTATAATATCAAATATATGTTTGAAATTATTAAAGCTTCTTTTAGAATACTTAATATATCCTATTACAGATACTTTAAATGTATTACCATCTCTTCTAAACCTACATAATCCACTAGGCATTACATCATTTCTAACAGAAAAGGTATTAGGTGTTAGCCCTCTCTTTCTAAATTTAGGTTTTCCTGCTATGCCCTTATAGTATCTAACAAAACCATTCAAAACATCTTTTATTGCTACTACTTTAGAATGTCTATCGGATTCGGTTAACCATTTATATTCGTTTAGTTTAGTAATATATGTTAATTCTTTTTTAAAGTCTTTTTCCAAAGACAAATTTATAAAAGTACCTTTATCTTTTTCCTCGTAACATCGAGCAATAAAATAATTCTTAATAAATCTAACATTATTTACGGACTTCCACATTAATTCTTCTTGTTCTTTTGTTGGTAGTAATCTAATATTAATACGTTTATATTTCTCTTCCGACATTATATTCACCTCCTTATAGTATATAATATACTACATAAAGGAAATAATGTCAACAGTTATTTGGAATAAAATTGTAATTATCTATAAATTTTAACTTTCTTTGAGTTATAACGCTACTTATAACTCCTATAGTTAATCTATAGCTCTATCTTTCGATACGAGTGGAGACTATTTGTCATTCCTACTTTTCGTAGGATAAGGATTTTTCTTCCACCAATAGCTTGTGGCTTTACTCTCCCGTCAGGAGATAGTCGTTGAGGGTCTTCCTTATTCATTTGAACTTAGGACTTTCCCTGCTATACTTCCATTGTTCTTCGTCTTAGGATTTAACCTTAACGTATCTCAATTATTTTTTCTACTTTCGTAACTTTTCCGTCTAAGATTTCTCTTTCTGTTTTAGTTAATTGAGCTTTAGGATTTCATAGCATTTAACCCTTGATACATGCTTATTACTAAACATGCACGGCAAAGTTTATATTAAATATTTTTTTATTTTAATTTAATTGTAACTTATTGTTACCGCCATGGCTAAAGAACCTATCGTTAAAACTTTCGGTATTATTGTAAGCTATAAATTCTTTCATTGCAATCTCTACTTCTGACAATCCATACCCACTAGAATTTAAGTCTGACCTAGGGTTCCTAATACCCATGACAAGTTCTCTGCTTGTAAAACTAGCTACTACTTGCTTATCTATGACCTGTACAAAGCGATTGCCACCTTTAATTATCTTACCGTTTTTATCAGTAGCATAAAAAATGGTGCTAGGGTCTACTGCAATAAACTTCTCCATCTTAGTTTTGTTTTTAGGACTAAAAACTTTTTCGAAGTTAACTTGGTCGTACGTGTAAGTATCTCTTACTATTTTTTTACAAAACTCTTGGAATGAATCCCTGTCTATATCTTTATCTGTACCTGTATTAAGAATAAATTCTTCAATACGTTTCATCTGTTCTTTTTCTTTAATACCAGGTGTAGCGTCTAAGTCTTTTAATTTAACTTCAAAACCTACGCCTTTTTCTGAATATCTGGCAGGTTTACAGTATGTAGATACTTGGTTAGCTCTTGTAATAATTATAGCATTTAGTATAGAGTTATTACCAAATTTCTTTAACACTTCATGTAAGTTATGAGCATTCCTCATGTAGCTCTTCTTATCTCTATAATCAGGATTTGTATCCATCATTTCTAAAAATGGTTCTGCGTAAGCTTGCTGTTTACCATATAGAGATTTAGTAATTTCTTGCATCTCTTTTGTATCTTGTTCTATTTGTCTAATGTTAGCTTGTATTCCGTCATCTATAGGAACCATAAGGTCTTCAGTGTCTTCTTTATACATACTACCTAACCTTAGACTTTTAAATAAATCAGGCAACTTTTTATTTACCTCCTCGAATAGTAGTTAGTATAACAGTGTTATTATAGGTAATGTCTTGGATATGTTTAGGAATATTTATCTTTACTTCGAATGGTTCTTCTATATAGTAAAACATTTTCTTACTTTCCATAACAATATCATAATCCTCTAACACAATATTATTATCCTTATCTACCAATATTACTTTATTATCCTTTGTAGCTTCTAGTACCATATATTTAACTTTATCAATAGCAATAAACATAGCTACATGTTTACCACCTATCTGTCTATAATAATCCACTACTTCTATCCAATTATCTGCTAATCCTTGACCTTTTATAAAGTCTTTTGCTTCATCCCATTTATCGTCTTTTGAAAATAGCAAATGCTTCAATCCTTTAATTTTTTATTTTTTAAATTCCTAGTATTTACAATCTTCATAACTAAAAACCAAAAACTGCCTATTACAGCTCCAAAGAAACTTATACCAAAAACAATTAAAGGGTTATTAAACCCTACATACTGCTCCGTATTCTCAATAGAGTCTATGACATCATTTTTTATAATGATTGACGTGGCTTGAAACATTGTTAATACTACATAAGAACCTATAGCAATTATAGCATATATCAAATATAGAACCAACTTACTACTTTTTTCAGTTTTAATATACGCAAATACCATTAGTGCTAGTAGACTTACACAAGCAAAAACTACGGATATAGCTGTAAGTACGTTTAATCCTATCAAAAAATCACCAACTATAATGTTTATTTTATTACTCTTTTAATATAGCAAAAAAAAGGAGAGGTTATCCCTCTCCATTAGTATCATTACTTTCATCTGCAGGTGTGCTAGGTTCCAATGGAACTAAAGGTATTGTAGTATCTGAGCTAGGTTTTTCAGGTTCTATAGGTTTTTCAGGTTCTATAGGTTTTTCAGGTTCTATAGGTTTTTCAGGTTCTATAGGTTTTTCAGGTTCTATAGGGGGTAGTGGGTTAGGGGTAGGGATGTTAGGTTTAGGTAGAATAGGATTAGGGTTAATAGGATTAGGAATAATAGGTTTAGGGTTAATAGGATTAGGAATAATAGGTTTAGGTATAGTAGGAGAAGATAAACTAGGTTCACTTGGTGGCTCAACAGGACTTACAACAGGAGGTACTACAACTGTACTGACACCATTATCTTCTATTATCTTAGGTCTAGTAACTTCATTACTTACAACAACCTTATTATTTACTAATACTAAATCTTTATCCTTATCATTACCATAAATACGTTCTCTTACACTCTTATCCTCTTTATCTCTTTCTTTTTCTGTTTTATCATTATAACCTTTATAATTAGTTTCTTCTTTAACCTTTTTAAGTTCTTCCTCAGCCCTATTTAACTTCTCAACATACCTTTTTTTAGTTTTACCGTCATCATCATCTGCTTTTTGATAAATTTCTACTAGCTTTTGATATCTGTCCTTATCTTCTTTAGCAATTTGGTACTTGTTAAATGCTACTGTAATTAATACTATAAATAGAGCAACTACAATAGTTATAAGTGTTATAGTAATCTCATTACTACTAAACTTACGTTTCATATTATTTATTCCTACCTATCCATAAAGGTCTCATAATATCTATTATAACTTATCTAGTTTTTCCTTTTCTTCTTCTTCAATACGTTTCTTTTCTTCATAGTCTTTGCTTAACATAAATGTAATACTAACATTAAGCTCATTACTAGATAAAACATTACTTAAAGCTGTGTCGGTTACAACAACATCACCTAACTTAATAGCTTCTCCATTTTGTACATCTTCTTTAAACTGCTTGTTAGCTTCAAAAATATCAATATTATAATCAAAAGCTAATTTAAAAAGTTTTTGGTGTTCTTCACCTGTTAATGTATCATCTAATCTACTTTGAAACACCATTAGAGAACCGTCTAATCTTTGTGTTTCATCAATAGGGTCTTGCCTTAATACATTGTAAGAACTATATAGCTTATTAATCATCTCACATAATGTTTTACTAAATTCTTTAACTTTATTTTCTTTTTCTTCTGTAGAAATAGGTGTAATTAACTCTTCCAATGTTTTTGTATTATTATCTTTAATCATTCATATCTCCCTTTTTTAAGTTGTTTATAATATCCTTTTTTACTTGTATAAGTAACTGCTTAGCATTATTCAATCTTTTTTCTTTTACTATTACATTTACAACTACTAATATAATAATACTTATATATATAATTGTATAAATGAGTACAGTGCTAAATAAGCTCACTGTACTCACCTAAAAATAACTTTATATCTTGTTTTTTTAATACATAGTAATCTTTATTTTTAATAAACCCTAACAATTTTAAGAACTCTATAGCTTGAGGTAATTCTATAGCATAGACAACAGCGTTCTTGTTCTTCTTTATTGCTAAATAAATTAACTCTATTATAGACCTAGCACCTACGCCAGTAGTTTCAAAGTCTGATACATATCCATGTAATATAATATCAGAATCTGTCTCTTTAAAGGAAGCTAGTCCTATTGTATTATTATTATCATCTACAAATTCTTTATATAATGATGCGTTGCCATCTATGTGGTCAGTGTTCACACCTTTATTCTTTAAGGTAGATAGAGAACTGGCAATCTTTTTAGGATTAGGTTTCTCATCATCACCGTGAGTAATAACCCTAGAACCTTTAGCAGTTTTAGGTTCTTTTGGTTCTTCACTATTACTCTCTTTAGGTTTATCATCGTTTTTATTATCTTCATAGATTGTCATTTCAATTTCTTTCCCATTACGTACTACAGTTCTTTTTACTTTATTCAATGAGCCTATATCTTTAGCTCCGCCTTTATATATACGTTCTGGTTCTCTTGTTACGTATAAATAACAGTCCATGAAATTATCAAAGCCTAAGGATTTATATATGTAATCGTATTTATTATCTAAAAAATCACTATGTATAGAAACATATGATAATGTTAAAGGCTCTTCAATTAATAAATTAAATGTCTCCTTGCTTATATCATCTTCTTGTATTGTATCATAATTTAATATATTTGTCAAGTCGTCAGTCCTTTCTTATTCATCAAAATAGAACTCATTAGACGAGTTGTTTTGTGTATTATTATAATCCGTTGGTATAAAAGTGGATGTGAATGCTGTACCGTTGCCTTTATCATACAATTCTTTTAAACGAGTAAGACCAATGTAACCAATTACTGAAGACTGTGCGTAATGCATTTCATACCCTCGGTTTCCCGATATTTATTAGGGGATTAGACTATATCTTAGTTATCTAGATTGATAACTCAGTGCTTTACGAATAAAATAATTTATTGTTTAACAATTTCTCTATACTTTTGTAATCCTTAGTTGTATAGAATATCTCAAAAAGCTCATAACCGTTATCTTTTGCATAAGAACTTTTTATACTATCTATCTTTTTTTGTAGCTTAAATTGTTCTTCTCCTCCAAAATGCTTGACAGGTTTAACGTGTTGTTCACCTTGATATTCGATAAGTAAGTTATATTCAGGAAAATAAAAATCATATGATAAGTTATTTATTAACTTTAAGCCTTCAAAAGTTTTTTGTTTTTCATATGTTATACCTTTTTGCTCTAGATAACTTTCTACTAATTTCTCACCTATGGAATTTCTACAGTGTGAGCATCTTCTACCTTTTCTAAAATTTGCCATAGTTCCCCGATATGTTTTTCCGCACTCATTATGCTTTATTTCTATGGGGGTGTGTGCATTTTTATAATGATTTGAAACTACTTCATAGTTTCCTTTCGTTTCTTTACGTACTTCAAATTTAATATCTTCCAATGTCCTATTAAATCTCCTGTTACATCTCGAACATTGTTTATACTTTAAAATATCTCTTGCAGTAATAGTATAAGTACTATCACAAAAGAAACAGTGTAAAGTTATCTTCTTAAATGCACCTTCATATTTTGTTATAGCCATTATACCTTCAGGTAATTCCTTTTGGTATTCTTCATGTGTTTTTCTTTGCTTACTATGGACTCTTTTTTGAGAACATGTATTACAACCTGTCTTACGTTTACTCATAAATGTTGATGGTGTTATAAGTATTTTGTTACCACATTTTTTATGAATAGCTCTTAGTTTTGTGTACTGATTAACATAGTCATCTAAAAATTCATATTCTTCATAGTCCTCTGGTCTAACATCTTTAATTCTATTAATAAACCACTCGTTATCATAAACCACTTAACTACCCTCCTTTTTAGTATACTCAATAAATTATTTTAATCTCTTACGTTAATAGTAACGAATTTAGTCGTTAGGCTTTTATCTTAATTTAATAATAACATTAAAAAATATAATGTTAATATTTAAATTAAGAATTTAGCACGGTTGGTTCCCACTGTCTGTGTATAGTCAGATTTAGGGTTTCTTACCAGTATATTGTTTTTCTATACATTATTTTACTATGCCCGTTTAACACTGTTTATAGACGACCATATTACAAAATCGTCTCCTCTGCGTTTAATAATTTGGTACATTTCTCCTGTCTTATCATCTTCTTCATCCATTATAATAACGTTTTGCCAATGTTTAAGATAAGTTTTTAACTCTTCATCTACTTGTTGGTATACACTAATACGTTTAGCTTTTAAATCCTGTATATAACGTTTATTATGCATTAATTTATCTACAGTTACTGTATTACTATTCTCATTAAACTGTGCGTACAATTGACCTGATGAACGTGGGCTGGACTTATAAGTGCAACCAAATACTTTATCTTTACCAAAAAAATTAATCAATTTAAGGATATTATTACCAGAATCACCATTATCAGCAACAATAATATCAGGGTCGTACTTAGAGAACTCCAATATAATTCTTTCTAGGTCTGCTTCTACCATATCAGGTCTACTATTCTTCTTAACAGAAAATAAACGTATTAAATCTACATGACCATCTTCTGTCATACCGTGTACAGCACACCAGTGAAAATTACCCCAGTCAACACTGCAAGAAATAAATTTGTATTTATCTCTATTAAATAATTGTGTTTTTGCAATTTCAGATTTATTATTGAATACATCATCTTCTGTTACTTTCATTTTTACATCGTCAAAAGGGGCTCCGATGATGTAGTTATAAAAGCTTTGTTTAGATTCTGTATTCATTTCTTTTTCTTTAATCTCATCACAGCTTATCCACGTTGCGTTTAATTGACTTATATAGTATCCACGAATACCTTTATTATTTTCTGTTCTCTCGGCATATTTACAAGCCCAACGTCCAGAGTACCACCTATCTAAAGGCTTTCCACATTTTTGACAAACATATTGGTAAGTACCATCTTGGACAGTTTTAGCTATCTCATCTATTCCATCTGGATTTACTAGTAATACATTACCACTATTTTCTAAGTCATCAGGTTTATAATCAGCATACTTCATTTCATTAAAATGACCACAGTGTTCACAATCATAACCATAAAACCATTGGTCTGATTGTTTATACAGTTTATCTATACCATAATCTCTTACAGTTGGTGTAGACCACCTTCTTACTATTTTAAAAGGTGAACTTGACATAGATTCTAAAGCTGAGCTCTCAGCTAAATTATTTACACGGTCGTACTCGTCAAGTGAAAGATAGTCAATCAATTTGTACCCCTAGTTTCCTAGTACTTTAACACTTACTTAAGAGTGGGTTTAGACTATATCATAACCTTTCTATTAGGTGAAAGGTTCTCTGCTTTACTTCCGCCAAGAAGTTCTAATATTAGTTCCTTTGATAGCTGTGTCACTATTTATATAAGGTTCTAAAAATTTATATTCCCCTTCAAATAACTCATCCATGTAAGTCCATATATTGATAATCTTTAATTAAGGCTTGTACTTTATTCTTATCATTAGTAATATGCTTTACACGCTTTTTTTCATAAAATTATTTACTTATTAAAAATAATCTTGGCGGTTTTCTTATCTAGTTCTCACTATACCCTTTTGTATAGATACCTAGAAATTTAGTCGTTAGGCATTTAGCTAACCTTATAAATACATTATATCATATTCTTTTTATAAAGTCAACATTTAGCACGGGATTGCCCTCGTCTTTACGTTAGGGGTTTCCCCGTTTAACAGAGTTTAATGTGGACTTGTTACCTATCCACACCTTCGACAGTACTAGCTTTACTACTAGTTCTGAAAAATAAACTAGAATTTCTTATTTGTTTATAACCTAATGAGTCCTTATCCCAATTAACAATATCTCTAAAATAAGGTTTTTCTAATACTGGATTAAGTCTTGATTGTACGAATTTCTTCATCTGTTCATTAGTCGTTACTACCGTCACTTTCGTGATATTTACATACGGACTAGACTATATCTTAACTCAACTTTTTGGTGTTGAGCTCTCTGCTTTACTTTCTTGACGGGTTACCACACCCAAAACACTTTCTAATTCTTCTATTATCTCTTTCTCTTTTTGTTTATAGGACACTCTTACCATCCTAATATTATTTCTTTTTGCGTAATCATCTTTTAAGCTATCTCTATACTTCAATTCTTCAAAAGCTTTAACACCGCCAAAATAATCTATTGGCTTACTGTGCTGTAATCCATCATATTCTATTAAAGTATTTAAATCTAATAGGTAGAAATCAAATATTAGAGGTCTTTTATGAACACAATCTTTAAATCTTTTCTGTTCTTTAAAACGTATATTATTTTCTTTAAGGAATTCAGCTATTAATTTTTCCCTTTTAGAAACTTTACATTTAGGACATCCACTCAGTCTTAAAACAGAATTAGGTTCTGAAGAGAAAGTATGGTTGCATGTTAAACATTTAAAATCTGTTTTAGTGTGAGTATTTGTATACTCACCTATAATCTCTATAGTACCCTTATGTTTCTCTTTTAGTTGTCTTTTAACTTCACTAAGTGGTTTATCTTGTATCCTACTTATTCTTTTACTTCTACAAGCAGAACATCTTTTACCTTGTAGGAAATTATTTGGTCTTATTTCAAATTCTTCCTTACATTCGTTATGAAACATTTTTATATTTTGATTTGCGTATTCATAATGCCCTATTACAGCGTATTCATTTCCTGCTATGTCTTCTACTTGTTTTACAAATTCTTCATGTGTTTTTTTCTAGGCATTTGTTTTTCCACCTCCTATTTAATATATTAACTTACTTTGGTATTTTTGTCAAGACTTTCTTATCTAGTTTTCACTTATTCCTTTTAATAAGCTATCTAGAAATTTAGTCGTTCGGCATTTACAACTTATTAGGTTGATTTAGCACGGTATTAACTCTATCCATTAGGACTTAGTCTCTCTTACCAGGATATTCTTTATTTTCCTATGACCGTTTAACAGAGTTTTAATTCCCCAACTTATAATCTAGGGAATGTGTATAGACACTTTACACTTGCATAACTATGCATATCAGCAAAATGTACCATTTCCATTACACCCATCTCACTTACAATTACTACCGTTACTTTCGTAATACTTTAACATTCATTTAAGAATCGGTTTAGACTATATCTTAGCTAATGAAAAGACATTAACTCTTTCACGTTACGGGTCATTAACCCTTTTATCTAGTTCTCAATAAACCTATTCGTTTATCTACCTAGAAATTTAGTCGTTAGGCATTTTTTTAGCAAGGAATTGTCATAGGATATTATCCCTTAGAGTTTTTCCTTTTAGTGAAAGTTTTACTTGAACAAAGCTTTATCCAAGCTGTCGTGATTTAATCACAACTTTATTAGGATGGTTGTCATTTACTATCATTTATTACCCTCGGTTTCCCGATATTTATTAGGGGATTAGACTATATCATACGTATACATTTAGGTGTATACGCCCTCTTTCGTTACGGTTTCCCTTTTATACTGTTCTACACTTATCCATTTATAAGTTTACCAGTAAGTTTAGTCGTTAGGCATTTATTAGTATCACTACTAAATTTAGCACTTGATTGTCATATGCTTGTTTAAGCACTTAGAGTTTCCAAGTTTAGAAAAGGTTTATAGTCCGCACAGTATGTTTACGGACTTGCCAAGGTCTATGAGCTTGTGCTTTACTTCTGTCCCTGTTTGGAATACTAAAAGTTATCGGGTGACCTCGTAACGTATGATATTTTAGCATATAAGTACTAGGGTTTAACATGTTGATAATATGGTCAACTTGTTCTTGCGTAACATTTTGTGTACCGAATGTTTCTTGTGTTATTTTTAATAATTCTTTACCGTCCATTCATATACACCTTTCTTTAGAATGTATTTGAGTTCTCTTCGTTCATAACCTTTTCTTTATCAATAATCATAGCAGTAATGTCATCAGCAGATAGTTGAGATAACTTCTCTAAATCTACTTCTTTCTCACCTTTACTATTCTCATTTGTTATTTCATCAAAGAGCTCTTGTTGTGGTCTTGATAATTGCGGTATAGCACCACCACCATCAGAACCATCTGTAATTAAGTTTTGCATTTGTTGGAAGATAACAAATACTTTGTACAAATCATTAGGGTCTCTTACTTCTATTTCCCCTCTATCAATCTTTTTATTAAAGTCATACATAAGTTTAGTAATACCTGACATAAATCCATCAGCTATATATTTACGTTTATCTTCGTCTTCAATTTTCTTCTTAGATAACATATCCCTTAAACTTTCAGCGCTCACTCTATCAATTCACCTACTTTCTTTAAATTCTTGTAACAGTTATTAATATCTGCGCATATGTCAAAATATAAGTACTTAGAATACTGTAAATGAAAATGATTAACTTTAGCTATAGATTTACCTTTAGTATAGTTCATCCCTGAAAGAGATTGACCACATAAACAACACACCCTACTAGGACTTGCAATACGTTTATCTCCTTTTTTTGTTAAGGAAACAGCGGTTGCATTATCTTTTAGCTCTTTACGTTGTTCCTTAATGTCCTTCTTCGTTTTCATCGACAGCATCTCTCTTTTTATCTTTTAGTATTCGACGTTGTGCTTTTGCTCTTACTCTTACTTCCTCAGCAGAAACATTAGTTTGTGACTCCACAATTTTCTTTAGTACTTGTAATTCATTGTTATTTAGCTCTACTTCTTTTAGAATATAATCGGGTAAGGGGTCTTCTTTGTGTAATAATAATTTATCAGTTATTGTTAATGCCACATTAGAAACTATCCCACCGAATATAAAGTAAGTCATAACTGTACTAGGTCGAATAGAGTATATTAATGACAGTGAGTTAATAATAGACAAAATAAACAAAATAAAAATAATAATTATTAGAGTTTTAAATATAAATACAGCTATGTTATTATTCACCCTATTAGTTCAGTCCTCCTAATTTAAAATATACCGTACACTATTAATGTAACATTGTTGATTTATAAACAGGTTTCAATGTTATATTAAAGTTGTATTATATAAGATTTTATTATCTAGCTAAAAGAAATTAGGTGTAATTAGTGGTTATACTAGCAGGCATTATAGCTATACCTCTTTTTATTTTTTATTTTTATTTTCTGTTTAGCTTATCTAAATCACTAGCATACGTAGTAGTATTAAAAGAGTGTAAAAACATTATGAAATATATAGGCTACTTGGTGGTTGTTTATATACTATCTTGTTTTTCATTATGGTTAATAAGTACAGGTGGTTGGTGGTTGCTAATTTTATTAAACATAATACTTATATCTGCTACTGCAATAACTATTATAACACAAAACTAGTGTAGCTCAAAATTAATTATAAGGGGGTAAGTTGATTTGACTAAGTATAAAGATATATTAAAATTAGAGTTTAAAGATGCCTTAGCTCACTTTAGACGAGATAGAAAATTCTTCCACGTCTATAGGATTGATAGGTTGCTTATCAACGGCTCTATTATATATTTTGATTATTATTACATACCATCTGATAATCCTAATACCGTTATTAAAGAAATAGACCTCCATGAGTTTGGTAAGCTTAGGTTTGAAATAAATACTAAAACGTCATACGGTGAGATAGTTACTGAGGATTATATGCAAATTATTAATAACTTTTTCGAAAACTATGACGTCCATTCAGAATCTGAAAAGTTAGACATTAAGAGGTGACTTTAGTTGAATGAAGAACTAAAAAACCTTGTAGGACAAGTAGATAAGATAAAAGATAAAATACAAGATGGTAGCTATATTGATAAAAATACGTATAAGGAATTAGAAAATGAAGTTGATGAACTAAGAAAAATGGTAGTTAGTTTAGACAAAGAAGTAGCTGTTAATAGTGAGAAACAATCGTCTATCTACATACAGCTAGATAGATTAGACGAAAAGATAAAAGAACTCACTAACAATACAGTTGTTAAGGACACAAGAAAGAAGGATACTACCGAGAAAGTACTATTACTAGTGTTAGGTTCTATTATAACTTTCATTTTCAATAAATTTAGTTAGGAGTTTTGATATGGTAAAACATGCTGAGGTAACAATGATTAGTGGAAAAAAATATTATTTAATCTCTGACGATAGTATTGAGTATACACAAAGAGAGATAAATGGAACAATTAGAGGACATGGACAAGCATCAGTTAGAGTTAGAGTCTCTGAGGATATTAATTCTGATACAGTATTCATTAACCCTTTATTCATAGAATCATTTAAATTAGTATTTGAAAATTAGTGACTTTTAAGTAAGTCACTTTTTTATTACTCTTTGTTGACTTTCCTATATATATTATTAATTATTATAACTAGTATTATTATTTTAGTATTTATAATTATTTATTATATATATAAGGAATCCTCCTTATTTTCCAAATAGGTAAAAAAATCTTTAAAAACCTTGATATAAAAGGATTTCTCAAAATAATTACATAAAATTTAACAAAAAGCATTGACATTTATTAAGTCTTACGTTAGAATAAGAGTATCAATTAAAAGAAAAGGACTGATGTAACATGGAAAACCAATTAATGTTTAATTTTGAAGGAGAATCAGTAAGAACAGTAGTTAAAGACAATCAAACTTACTTTGTAGGTAACGAAGTAGCTAAGATATTAGGATATTCAAATTATCGAAACGCTATAAATAACCATGCAGAGGATGAAGATAAGCTACGTACCCAAATTAGGTACGCAGGTCAATTAAGGAATGTGACATTAATCAACGAATCAGGTTTATACAGTTTAATCTTTTCATCAAAACTAGAATAAGCTAAACGATTCAAGCGTTGGGTAACTTCAGAAGTTCTACCTGATATTAGAAAGTATGGAATGTACATGAATGATGATTTTGCTAAAGCTATTATAGATAATCCTCAAGAAGCTAAAAAAGAAATGCTTAAGTACTTTGAGGAGTCAGAAAGATTAAATAAATTGGTGACTGATTTACAAAAAGAAAATGATAGGTTATCTTCAGTAGAGAACGAAGTTATGGAATTAGAAAATAAACTAGAGTTTTTACAAAAAAGACCTGAAAATAATGATTGGAAACAAGAAGCAAATAAAAGGGTTAGAAAATTAACACCTAAAATTAGTAGTATTATCAACCCCAACTTTGGTAAAACATGGAATGAGGTTTATAAAGAAATGCTATATTCTCAAAATCTCAATATTAAATCAAAACATACTCGAAGATTAAAGAAAATGAAAAGTAATAACGTTCCTCAAAGTACAATAGATAATACAAAAATTATTGACACTATAGGAACTGATATTGAGTACGTTGATAAATTATTCAAAGCCCTAGATAACTTAGAAGATAAATATACTACTCCAGTATCAGAAGAATACCCATCTTGTTTCTTAAAGCTTGAGTATTAAAAATTAACTAGAAACATTAAATAAAGGTGTTGACCTAATACTCAACACCTGATATAATCTAAATATAAAACAAATTAAAAGAAAAGGATTGATAATCATGAAAAAAAGACAGAAAATGTTCCACAGTAATTTAGTTTGTTCAAAATGTGGTAATACTTTTACAGTACCAAGAAAAAGAGCTCAGAAAAGAGAAGAGGGACATATAAAGCATTTATACTGTATCAAATGTAAATGTACTACTGCTCACATTGAGGATAATAGAACAGAATCAGAAAAATATTGGGATAGAGTACAAGAAGAATTATCAAGATAAAAAAGTAAAAAATAACTTGACAAACTCAAAATAGTATGTTATATTATATATAAGCTCATAAAGAGCTATAATTTCATTTTGCATAATAAACATTCTTCTCCTTATTTTTATTTGTCGAAACTAGGTCTTTTATTACGTTTTTACCCTAGTATAAAAAAACTATAAAACGTAACACATTTTTTAATTGACAAATGAATGATAATATGTTATACTTTAAATGTAGTATAATTAAACATACATACATAATGGCTGATTTAAACAGGGTGGTACCTGTAAGGCGTAAGATTGTCGAACGAATTAAAACTTATCGGTATACGTCGGTAAGGTAATTCGTCAATAGTAATGTTTATTACAATCGGAATGCTTAGCAGTAATGTATTAGGTTTATAAAGTATAGTATCCGATGGGCTTAATTTTTGTAGGGGGTTTTGGTGGTATCCTTTACAAATACACCTTAACAAGTACATGCAGTTGGAGCATTGAAAAATGTTTGATAACATACGATACTAGTACGAGTAGCATAAACCTGCAAAATAATAATTGGTAAAAATATAAAGATGCCGTTAAAATTCTTCATACCATGTGAAAGTTACTAATTAATATGTTAGTATCACATTACACTATTAAACGGACTCAACCCTATGGTTGTACTGCTTTAGTAGGTTACGTGAGATGGACTTAGGTTAGCTACCTAATAGAGTCAAGCGTAGTGATTAACTTAACAATAGGTCTAATATGTTACTTACCAGTGAGACGGTTTATGTATGTATGTTTAATTATACTAAGGAGTATTACTCAAGTGGCTTAAGAGGTTGGGTTGCTAACTCAATAGGTGATTTATTTCACTCATAGGTTCAAATCCTATATGCTCCGTAAAAAACAGAAATAAAACCAAATAAGTTCTTAGAAGTAAATCAAATAAGACACAAGAACAACGCTAAAAAAATAGTAGGTGAATTGAATAGTGATAACGAAAAAAGTCAGACTTAAACCTACCAAGCAACAAAAATTAAAATTATGTAAATCAGCTGGTATAGCACGATTTATATATAATTGGACTATAGCAAAACAGCAAGAAAATTACGAACAAGGTAAAAAATTTATACAAGACACAGTATTAAGAAAAGAAATTACACAACTAAAGAAAACTAAAGAGTTTAGTTGGTTACATGAAGTAAGTAACAATGTTCCTAAACAAGCAGTTAAAGACGCATGCAATGCATATAAAAAATTTTTTAAAAAGAAATCTGGTTTCCCTAAGTTCAAATCTAAAAAGAAAACAAGACCTAGTTTCTATAATGACACGTATGCACTAGTAGTAAAAGAGAAAAAAGTACTAATAGAAAAGGTAGGTTGGGTTAGAACTTCTGAACAACTACCTATAGACACTAAGTACTACAATCCTAGAATTACTTTTGATGGTAAATACTGGTATATAAGTATCTCTATAGAAGAAGAAAATAAATATGAAGATTTGACCAACGAGTCCTTAGGTATTGATTTAGGGATAAAAGAGTTAGCTGTATGTTCAGATGGTACTATTTATGGTAATATTAATAAAACAATAAAGGTTAAAAAATTAGAAAAACGATTACGTAGGTTGCAACGTAAGGTATCTTTCAAATACCAAAAAAATAAAGAAGGGAGTACGTTTGTCAAAACTTGCAATATCATAAAACTAGAAAAACAAATTAAACTCCTACAACGAAGATTGTCTAATATTCGTAAAAACTATTTACATCAAGTAACATCTTCTATCGTGAAAACCAAACCTAGAAGAATTGTTATTGAAGATTTGAATGTAAAAGGGATGATGAAGAATAGACATTTAGCTAAAGCAATACAAAAACAAGGATTTTATGAGTTTAGAAGGCAATTAGAATACAAATGTGAAAGACAAGGAATTGAACTTGTTATTGTAGATAGATTTTTCCCTTCTAGTAAAACATGTTCTACATGTGGTAGTATCCATAAAAACCTAAAACTATCAGACAGAGTATTTAAATGTAAATGTGGTTTTAGTATTGATAGAGACCTTAATGCTAGTATTAATTTAGCTAACTATAATATTTAAGTTATCACAAATAAGATACTAAATATGTGTACCATTCGTTGTATGGGAATTTAAGCCTTTGGAGTATCATACAAATCCGAGTAGAGTATATAAGAGTAATCAGTAATGATGAGGGTACTCAAAAGGGGATACGTTGAAAAAGGAATAGGATTTATAAAGTTTTATAAATTTTTGACAACGGTAGATACTAATATGGCATCTGCAAAACAAATTTATTATACCGAAAGTTTAATCGGTAGAGCAATTATTAATGAAAAATTCACAACTAAAAAAGATATTTGGGATAAATTAGATTTACTTCCACACACTAAGTTAGAAGACTTAGATAATAAACAAATGTCAGAAGTAATCAAAACACTTTCTCAAATTAACGAACAATAACTTAAAATTTAATAACTAAAACCATTCTTTTTGTTATATTATTATTAGCTTTACAATAACAGAAAGGATGGTATTTTTTTATGTCAAAAAAAGATAAAAAACCATTATTAATAGCAGGTAACAATATTACTGCAAAAGCAAAAAGTGCTACATTTTGGACAGGTTTTGTACCTGTTTTAGCTACGTTTATTGTTAGTGTATGTAGTTTACTAGGAATCAAAGGTGCAGAAGATATTGTAAACCAAGGCACTGCAATTGCAGGTGTAGTTATTAGTTTCTTGACTGGTTTAGGTGTTCTTGTAAGTCATGACACTAAAGGTATAGCGGATAGCCCTATTGTACAGGACTTTAACAAACCTAGAGATTATAATGACCCAGATAAAGCTTTAACATACAAGAGTGAAGCAATGAATAGTACCTCAGAGTTACCTCCTACAAAGATGCCGATGGCTCCTGAAGGAGTTAATAATGAAGACATAGATACAAGTCATGCAGAACCATTAGAACATGGTAAAGTAGAAAAAGACTTAGTGTCTGAATTAGATAAAGAAGATAACCCAAAAGAAGTAGGTGAACAGTAATGATAGAAATTTGGAAAGGTGTAAATGTTAGATATGATTTACTGCCTATTGGAACAAGACGCACAGGTCAAGCTATGGCGGTTAAAAAACCCGTTTTTATTGTAGCTCATGATACAGGGAATATTAATACTACAGCTCAAAATAATGTAGATTATTACAAAAATACATATAACATTGATTGGGCTTCCACTGCATCCGCACATATCTTTGTAGATGATAAAGAAGCTATCATATGTGTTCCTACTACAGAAAAAGCTTGGCATGTGTTGTATAACGCTCCTATGGATGACCTATGGTACGGAATTAACGCTAATGATGGTGCTATTGGTGTAGAAATTTGTTACTTTAGTGATAAAGAACGTTCTAAAAAATCATTAGACAATGGAGCTCGTGTCTTAGCTTATTTAGCTGAATACTGGGGTGTTGATTACAAAACAAATATGCCAGGTCACCAAGACATCCAAAACGACAAACAAGACCCAGGTAACTTATTAGAAGCATGTGGATTAGGTAGAAACACTAGTAACTTAGATAAGGAAGTAGCTAAGTATTACAAGAAAGTTATTAAGTCAGTAGATGTAAAGAAATCAGGTAATGCTGAGCCTAGAGTAAAAACACAATCTACTAAAACTATGTGGAGCTGGAAAGGTACTTTTTATCCAGATAGAGCTATTAAAGTTAGAAAATCTCCAGGACTTAAAGGCACTATAGTAAATAGAGATTCATGGCTATACGATAAGGATGATTGGGTTGAGTTTGACCAAGTTATTAAAGCAGATGGCTATTGGTGGATTCGATTTAAATATCCAAAACCAGGCTCTAGTAAAAATTATTTCTATTGTGCTGTATGTGAGATAACAGATAAACAAGAGCGTATTAAGAAAGAAAAATATTTTGGAAAAATAGATTGGAAATAAGGAGTGAAAACTTTTGAAAGCATCGATGACTAGAAGTGAATTTGTTCGATTTTTAAAAAGTCTAGAAGGCAAAGCAATAGACTTTGATGGTTGGTATGGTCAGCAATGTTACGACTTAGCTAACTATGGATTTAACAAGCTCTTCCCAGGTTATTCTTTAGGTGGAGCAAGTGCATGTAATATTCCATGGGATAATAAAGCTATGTTAAAAGATAAAGCTAGAGTAGTAGAAAATACACTATCCTACATTCCTAAACCAGGCACTATGGTTATCTTTAATAATTCATACGGGTGTGGTCATGGTCATGTCGCATGGGTACTAAGTGCAAACCAAAACCAAATTATAGTAATTGAAAATAATTGGTTAGGTGGAGGTTGGACTTGGGGAGATGCTCAAGGAGGCGGTGGCTGGGAAAAAGCTACTATTAGAGCCCATGGTTACGACTTTCCTATGTGGTTTATAGAACCTAATTTCAAAGACGAGGTACAAACAACTTGGAATTGGAGAGGTAAATTTACTGCTGATAGAACGATTAAGGTAAGACGAACACCAGGTTTAAGTGGTTCAATCGTAGGAGCTGAATCATTTATTTATAGTGGTCAATATGTAAACTTTGACCAAGTTATTAAAGCAGATGGCTATTGGTGGATTAGATTTAAATATCCTACAAACCCGTCAGCTGGGAACTTCTATATGGCAGTATGTAAAATCACTGACAAGTGGGAACGTATGCTAAAAGAGAAGTATTGGGGTCGTATTAATTGGAAATAATTTACTAGGGAAAATTCCCTAGTATTTTTTTATTTTTAAGTTGACAATGTATTTATCATATGCTACAATACATATATAAGTTTTAAAGGTGGTTATAATAAATGGAAAAATTAAAGAAATGGTTTAAACGTAATGTATTAAAAAGTGAGGTTACGCAGTACAAAGTATATATTAAGCATACACGTTCAAATAAAAGTAATGTTTTCTATGTTAATATGAAAGCTAAAGGTAAAGTAGAGGCTAAAGAAAAAACGCTTGACGTTTTAAATAAGTATGCTTATAATAAAAATAACTATAGTATTTTAAAAATTGAAGAAAGATAGGTAGTGGTTTATTATGGAAGAGAATAAAGTATTAAATTTAAAAAAAGTAAGAGAAGAAAAAGGTCATACAGTTAGAAGTCTAGCACAAGAGATTGGAGTTCACTACTCACTTATTTCTTATTGGGAGAGTGGTAAAAGAAAACCTAAGAGTGCTAATCTTATGAAATTAGAAAAAGCTTTAAATACTAATAGTGTAGAATTATTTAAAGATGTTGACGTTGATGAATAAATTTACAAAATCTATTATTAACTTTGTTGAGCGTCATGAGATTGAGGATATGATTAATATTTTTGAACTTCAAGATGTTAATAAAGCAATAGGAGACAAAGCATTTTATACTATTATAGATACTATCTTAACCTTAGATAATATAGAAGATAGAGCTATTATTTTAACTTCTTTAGATAAGTTATTAAACACTAATAGGAGTTCTTTAGTTGATTATGATTCTAAAAACCCTAATATTAGAATTTCATATAGTACTGAAGAAAAAGGTAATACAATGCAAAAAGTAGTAGAGCATTTAAGTAATAAATTAGATAATTGTTTATATCAATCTTACCCTAATATATCTAAATATAGTATTATTAGAAGTACGGCTGAGTTATTAGGAGACCTATCGTATATCGAGGATTATTATACTGGTGATGACTTAACAAACGTTATTAAAGACACACATCTAGAATATATACACAACATTATTAATAGTAGTGAATTTGATAGTATCACATTATTAGAGCAGTTTGAACTTTTAGAAGAGTCATACAGACTTGAAGAAGTAAAAGAAAAATTAGAAGAGCTAGAACACTCAGAAAAGTACACTGAAATTGATTTAATTAAGTACCTTATTAAATTATAAAGGGGTTTTTTAAATGTTTAAGAAATTGTTCGTTATTTTAGTTGATGGTTTTGAAGTTAATGTTATTGCAGATGACTATATCGAAGCAGAAGAACATTGTTATAAGTTTTTTGATTTCTCTACTATAAAATTACAAGACTACAAAGAGATTTATACAAGTGAGATGTTCCCTTGCTTTGTAGAAAGGCATAAATATGCATAAGACTGCATTAATATATACAGATGGTAGCTCATCTTATAATAAAGGTCTTGTTGGAGCAGGAGCTATTATCTTAGATAAAAATGAGAACATTGTAAAAGAAATCAGTAAACCTATTGAAAATAGTAATTTAATTAAGTATAATAATGTTGCAGGTGAAATACTAGCTTGTTGTTATGGTATTGAAGAGGCTATAAAACTAGGTTATAAGCAGGCTATTATTCATGTAGATTATATAGGACTTATTCAATGGTATGAAGGTTCGTGGAAAACTAAAAACAATTTAAGTAAAACATATATTAATATGCTAAGGGAATACTCAAAGTTTATAGATATAAATTTTATAAAAGTAAAGTCTCATGATAATAACAAATGGAATGAATATGTAGATGCATTAGCAAAAAAAGCAATTGGAATATAAGGAGAAATATTATGATGAAAAAATTATCAAAGAAGTTTCAAAAAGGTGGATTTTGGGAAAAGTTATTTTTATAAACATGCTCTAAATCTGTTTCATGCAAGAGGATTTATGCCTACCTTGAAATCCTTCATAGAGAACGGAATAACTCAAAATAGAGTAAAGTCTATTCTTAGAAAATTACAACAGGTGGCTTACTTTAGTTTTAAAGGTCAGGACTATATTGTTAGTCATGGCGGAGTCCTTCCTGAAGTTCTTGGTAATTTAAACAAGATTTCAACAAGTCAGCTTATTAATGGAATCGGGGGATATGATTTTAATGTTGATGACCAATGGGAACATTCTGACGTAATCCAAATACATGGGTATAGAAATTTATATAGAGAACCTTTAAATAATAATAAAAAATCAATTAATTTAGAAGGGCGCGTAGAAAAAGGTGGTTGTTTAAGAGCAGTAACAATAGACAAAAACAACAACATTGAGAAACATGAAATAAAAAACACTGTCTACGACCCTAAATTCCTTTTATCAAACAGACGAAATGATAGTATTGACAAAGACCTCACTCCTAATCAATACTTAGATATAGCTAGAAAAGAAAATAAAATCATCAAAACCAATAAACAATATAGAGATGTGTTCTCAGTTAACTTTACAAAAAGAGCTTTTTCTAAAAAGAAATGGAATCAATTAACAGTGAGCTCTAGAGGTCTTTATATTGATGAAGGTAGAAATACAGTATTAGGAAGAGGATATAATAAGTTCTTTAATATCAATGAAGTAGAAGAAACCAAATTAGAGAATATGCCAGACACTATCCAATTCCCTTTAACTGGATATAAGAAAGAAAATGGATTTTTAGGATTAATGTTCTATGACCCGTTAGAAGGAATTGTATATGCAAGTAAATCAAAAACACATTTAAGTGGACATGGGAATAAATACGCATTATTATTTAAAGAGCTGGTAGAAAAAACTTTAACTAAAAGACAGATACAGACATTAACAACATTCCTTGAAAATCATTATATTGCTGACGATAGTTTTACTTTAGTGTTTGAAGTAGTTGATATCGAAGAAGACCCTCATATCATAAAATATCGAAAAAGCGATATATTCTTACTCGATATTATTTCAAATACGTTAAATATGAAAAAGAAAGATTATGATTATTTGAAATATGTTGCTGATGAAGTAGGATTACAACTAAAAGAAAAAGAGTTGGAGTTTGCTAGTTGGGAAGAATTTTATAAATGGTATAAGGATAATAATGGCTCTTATAATATATTGCATGAAGGGTATGTATTTGAAGATTTGAAAGGATTTATGTTTAAATATAAGTCTGACTATTACAAAGACTGGAAATATATGAGAGATATAGCTTACTTCTTATCACAAGGAAGAGATGTAAGACCTAAGCAATATATTTTAGCAAGAAATCCTGAACTTAGAGACTTTTACTATTGGGCTAAAATGAAAGATTCAGATGAACTTAATAAAGATATCATCACACTAAGAGATGAGTTTGAAAAAGAAAAGGAGAAATTATAAGATATAAGGGAGTTGTATGATGGAATTACAAGAAACATGGTTAATCCCAATAAAAACACTATTTAAACAATGTAAAAATAGAAAGCGTAAATATGTTAAATGCTTATGTAAGTGTGGTAATATAGTAGAGGTAAGAAAAGACCAGTATAAAAATAGAACTATTAGAAGTTGTGGTTGTTACTCAGCATACAAGAAGAAAAATAAATATGGTTTTGTTAATAGAAATCAAGAGCCTTTAAATATTAAAAATGTTGATGGAAAGGTATTTTACCCTTTATTTAACTTCTACGGTTATTATATAAACGAAAAAGGAAATGTATACAGTGATAAAACCAAAAAGATACTAAAACATACGATAAACAAAAAAGGGTATCATATTGTGTCTTTAAGAAACTACTCAGATAAGAGTAACACTCAAATAGTGCATAGATTAGTTGCTAGTGTTTTTATTTTAAACCCTTACAACCTACCCCAAGTCAATCATAAGGATTTTGATAAAAGTAACAACTATGCTTCTAATCTAGAGTGGTGTACTAATGAGTATAATACAGAGCATAAACTTAATTCTTATATAAGTGGTAAAAGAAAAAACCCTGTTTCTAAGTTAAATGAAGAAAAAATAAAAGAAGTAAGAGTGAGTGATTTAAGTCATACAGAATTAGCAAAAAAGTATGGTGTAAATAGAACTACAATCAGAGAAATAAGAGAATACAAGTATTGGAAATGGGTAAAGTAACTTTTAAATAAATAAAAAGGAGATAAAAACAATGGTAAATAAAATCAAAGATAAGATTTGCTATATGGGAGGTCATCTACTTAATCAAGCAATGATAGAATATAGAGAAAAACAACACAATCAAGTAGAAGGAATTGTAGGTGTATCTCCATACTCTCCTCATCAAGATGGCTCAATTAACGACAAAGCAAATGCTAGACAGGAGGGTTTGGCTGAGCGTATTCTAAATAATGACTTTAAGGCTATGCAAGAGTCAGATATATTTGTATTTGATGTATTGAATGAGGGATTAGGTACAATAGCAGAACTTAGTATTTTATTAGGAATGAAACACCAAGCTCAACAAATTATCAACAAATATGAAGATGTAGATTTTAGAGAGTTAGATAAAAACACACAAGATGATATATTAGAAGCGTATCATGTCGTCAATAAACCTGTTTTAATTTATTGCTCTGATATTCGTCAAGGGCACGGAAAACCATACACTGACCCAGACAGAGCGGAGTTTTCAACGAACCAGTTTATTTTTGGTATGATTCTGTCATTAACCGATGGCAAAGGTTTCATTTCGTGGGAGGAGGTATTATTAGAACTTGAAAGATTGGGACAGCAAGATTGATAATGCAATAAGAGATTATGAGAGTGGTCTCAGTATGAGGAAAGTTGCTACAAAGTATGGAGTTAGTTATACGGAACTGAGAACTATATTTAAAAAATATAACTATTCTCCTAGAAGCTACAAAGATTCTATGAAGTATTACCCTTTGAAATACACTCCTAGAAATATTTATTTTGAAGATGGTCTTTTATGGTCTACTATTCCATTTGCAAAAGAATATTCTATAAGTATAGCAGGTATCATCAAAGGTAAGCGTAAAAATGTATTAAAGACAAGAAAAGATAAAGATGGGTATATAATAGTAACGTTATTTGGAGAAAATAACAAACGTATTCAATGCAAAGTACACAGGATTATAGCAGAATGCTTTTTGCTAGACTTAAATAAAAATATTGATAGAAACCAAGTGAATCATAAAAATGGGATAAAAGATGATAATAGAGTTGAAAACTTAGAATGGGTTACTCCTAGAGAGAACACTTTACATGCAATAAAAACCAGTCTAAGGAACGACAATATTTTTGGTATAAATTCAAAATTAACAGACTATGATGTCTACTTGATTTACACAAGCAAAGAGAAGGCATCTACTTTATCTAAAAAATTTAAAGTTACTTATACTACAATTACAAATATTAAAAATAATAAAACATGGAATAATCTTACCAAGCACATTTTATCATTAACCAACGGTAAAGGTTTTATTTCATGGGAAGAAGTTTTAAATGAGATAGAGAATTTCGGAGGGTCATATGAATAATTTAGCTCATATATTAAGCATCCTATATGCTATATTAGTTACTGTAGGATATATACCTGCTTTAGTAGGTTTGATAAGAGATAAGAATGTTAAAGGTGTAGATAGCTATTTTTGGTTTTATATTGTTGTTACAGTAAGTATTAGCTTAACAAGCTTATTTGTAACACATGCACCCCTATTTCAAATTATATCAGTAAGTATTAATTTATTACTAGGTATTATTTGTTTTATTATATACTTATTTAGAACAACAGAAGTTAGTATTTTAGAAATGGTTATGTTTATAATTGTTATTTATATTGGCTATTCAGTAGCTAACTATAGTGTTGAATATGGACAGATAATGGCTACTATTAGTATTATCGTAGCTTATTTATCCCAAATAAATAAATTTTATAAAACTAAAAGTACAAATGGAACTAGCAAATATTTATTTCTTATTATAGGTATTGCATTAGCTTGTTTAATTATTAGTATGTTAATAACAAATACGACACCACATGTAATATATACAGAAGTAGCTAACTTTATTCTTATTACGATATGTTACCTACAGGCATCTTATTATGAATATAAAGGCGTAGATAACAATGAAAGACTTAATACAAAAAGGTAATAAATTTTATTATAAGGTTAGAAATGGTGATACCTTATGGACTATAAGTAAGAAATATGATGTGTCTATTAAACAACTACAAGAACTTAATGATATGACCTCGGTGTCTTTATCAGACAAAGATTGTATACTTGTTTATGTAGACTAGAAAGGACTTCTATATGGATTTAATAGATAATAAAGAAGTAACTAGTACCGATGAGATTATTTTTAAAAGTAAATCTAAAAATTTATATATTAGTGACATAGATATAATATCTAAAGTTACTATGTACACAGATGAGTTAGAGGAAGTTTTAGCAATGCCTAATACTATTAACTTTAAAAATTCTAAGAAGTACAAAGACTTAATGAGTAATCCCGATATTGTACCCGTAAGAAGAACTAAAAAAATTAAATATGAAACTTATCTAGAAGAACTGTAAAAAAGTTCTTCTTTTTTGTTGACTATTAAATTTAACTATGTTATCATACTTATATAATAATAAATGAGGTGATGACACATGTCAGTAGAATATAAAGAAACAGGATTAACGGAAGAAGAAATTCTTAAATTGTCTAAAGTAAATAGAAATAGTATATTTATAGGTGAAGAAAGAGTATATTTAAAAATAAATAATAAAAATATTGTAGATATTGGCTCTAAAGAATTATTAAGAGATATTAATAATACCTTTTGTTATTCTAGCGCTTTAAATTTACTTTTATTTATAGCATTATGTGGAAATAAAAAACTTACTACGTTTAAGGGAGACCCATATAAAAAAGTACAAGAGTTAAGTAAAACAGTTACAGATGTAAATACTGTATATAGTGAGTATATAGAAAGTGACGATAGGTCTGAATTTCCTTTATATAACAAAAGACACTATCGTAATAATATATACTGCCGTGCAAACTATGAAAATGAACTAAAACAGTTTGACAATACGCAAAATAAGAATAGTAATAATTACCTTACAAAAAAAATAAGAGACTTAAAAAGACAAATAAATACTACAACTAATGATATACTTGATGTATTATTAATGGGTGACTATAGTATATTTGGTATTAATATTGACCCTTATGCATTTGGTAAATCTTATGATAATAACTACGAATACTACAATGAAGTTTTAAAAAACATAAAAATAGGGCTTAACAAATTAACACCTATAAAAGATAATAATACTCCGTTTTTAATTAAGACTTGTTATTTAAAAGACATAAGTATAGTAACAACAGATTGGAGTATAGTAAACGGTGACTTTAATAATAAAAATGGAAATGTATACCTACACCTATCAAATACACTACAACATAAAGAATTTAAATTTAATATGTATGAAGATGATTTTAATAAGGATAAACTAAAAAATAACATTACTTTACCTGTCCTTTTAAATATTATTTTAAGTAAATATGGAAAGGAAAATTTAGCTTTTAACATAATAATCCAAACACTAAAGAATAATGATTATTACTTAAATCTAAGTAGACTTAATGTAAAAAACTTTGATGTATACTCTATGATAGATAGACCTGATGGTTATCGCACAGTTAGTAAAGGTGAAAATGCTACTGATAATTTAAACAATATGTTAAAATTAGTTGTGTCTAATATTGATAAAGTTTATAACAACGAAGATTGTGATATATTTAAAGAACACAAAGAGTTTCTAGTAATACCAAACAAAAATAAATGGAAATTACATGAAGCTTTAAATTTAAGTAAACAAACATATAATAAGTTTATTACTCTTAGTAAAGAAGAGCAAGAAAATTACCTTAATATACTTCGAGTTATCATAAATAAATTTCCTAGTTTATATAATGAGTCTAACTTACACAAACTATTCGATGACGACTTTATAATGGTGACTAATTCATATTCAATAGGAAATGCTTTATCTTTTAAAGGTACTACGAAAGAAGTTCTTAACTTTTCATTTTCTGACTTTAGAAAAATGGTGAATTATATAAACTATGATGTCAGAAACAGACAACGTATACATTCATACGCTGTTAATAATTTATATAGAGATTATATAGACTTTGCTTCAGACCTAGTACTTCTTGGATATAGAACTAAAGAAAGTATTAACTTAACACCATATTCTTTAAAACTAGAGCATGATATTGTTACTGATGAGTATTTAACAGTTAAAGATGAAGTCGATGACTTAAAGTTACAACAAAAATATGATAATAAATTAAATAATATCACAAATAAAGAATATAAGTTAAACGATGGCTCTAAAGTTAAATTTTTACCTGCGGATACTACTGAAAAATTAAAAAGAGAAGGTGAACAGCTATCTCATTGTGTCGGCAGTTATGCTTCGAATATTATAAATGACAGATGTTTAATATTACTAGCTAGAAAAGTTGACGATTTAGAAAAATCATGGTATACTGTAGAAGTAAGGATAACAAAATATGGATATACGTTAGGTCAACAACAATCTTTAAAAAGTCATGAGTTACCTAAAGAATTAAAAGACGAATTAATAAAAGATATTAAAAATATAAATAAACAATTTAGTGAGGATGTTGCGTAATGGTAAAACCAGTTATAACTTTAGAACCTAAAGAAGTTAAGACATTAATAGAGTATTTAAGTCATTTTGAAGAAGATGTACGAAAATATAAAGATATGGAGAAATTATATGAAGAATTACACAAAAAGTATCAGCTTGCTAAAGGAAACTACGTTGAGTAATGGAAAGGTATAGTAAAGAATATGTAGATATAGACATTACAGTTAGAGCATTAGTACAAACACCTTATAGAGACTCATATGATGTTACAAATAATAGAAACGAATTAGTAGAAGATAATATCGTCGTTAATAGTTTATCAGATTATGTTAAAGTACAAGAAGTTAAAATAAATGATATAGATTAAAAGGCAAAGGAACTGTTATATTATATGTGTACTTTATAGTACACTTCCATAATATCTTTCCTTTTCCCTATCTATATTCTAGATAGGGTTTTTATTTTAGATACGAAAGGACACCAATATGGATACTAGAGAATTTATTGATTCACAAATTGGAAGTAACAAAGAGGCAACAGAATTAAAAGAATTAAAGATAAACATTGTTGAAGCATCTTTAGATGTGACACATTCTTTAGATGACACATTATATTATGCTAAAAAGCTTATGAAAAATGTAGAACAACTGGAGTTATACTATAATGTCAATTCTACCACTAATACACCGAACCATTATAAAGGTAAAAAAGATGTTATATCATTTTTAGAAGAATATTTCTACATTATTGGCTTTATAGACTGCATGCTATTTAATATTGTTAAATATACAACAAGATTAGGAAGAAAAGACGATGAAAGAAAAGAAGTAGAGAAAATTAAAACCTATACCGAAAGGCTATTAAACTTCATAGAATATGGTAATAGTAATGGAAGAGAATAAAAAAAAGATACACAAATACTTTTGTTACTTATACTTTTCAGAGTACTTACCATCAAAAGGTATAGTTGTTTTAAATCATAATGTTACCTCTCATGCTACGGAGAATGGAGTTAAAAATTATTACATAGGTAATATTCTAATAGATAACGCAGAAATAACAGTTGTTATAGACTTAACGGATTTACAAAAAGCAAGTAGTATGCAAAATATGTTAGAAATATTGAATAAAAATACAGAATATTGTATCTTTAAAAGCAAAGAATTAACTACTGAGATGGTAAATACCTTCTTTAAAGGAGAAATTTTATGAAAAAATTAAATATATGTTTAACTATTATATCATTCTTTATCACATATAAAGTATTAACAAAAAAGAAAAAGCATAAACATGTCATTGTAGACTTTTCAGTACAAGACCATATTCATCTAAATGATATCTGTAAATAAAGGTCAAATTGCTATAATAGGTTCATCTGTATATGTAGTTAAGGGTACATCAAGCAATACTGATTGGATAATTTTAAATTAGTAAAAAGGGGATTTAATGATGATAGAAGACAATTTATATTTATTTAAAGCACATGTGGACAAAGTAGTGGATGGAGATACTATACATGTAACTATTGACCACGGAATGAGAACATATTCTGAGCAAAGAATAAGATTACTAGGTGTCGACACACCAGAAAAGAAACAAAATAATTACCAAGAAGCTAAGGAATTTACAACAACTATGCTAGAAGGAAAAGATGTTTTAATTCAAACATACAAAGATGATTCTTTTGGTAGATATTTAGCTAAAGTTTTCTACAAAGAAAATAAAGAGTATAAAAATATTAGTGAAGAACTAATTAAAAAAGGATTACTAAAAGAAAAAAGTAAATGGAATAAAGAACTTGACAAACAATAAAATATATGCTATATTATTATAGTAGTTAACTAACGCCTCTTGACAATGCGAAACAAAGTTAGCATTTTTTAACCTTATAATGAGAGTAACAGTCTAACTATATGGGTACTGTAAAATCATTATATTCTACCTATATACCAAGCGTAGAAAAGGTCTATGGTAACGTTATGACTCTATTTAGCGTTACTATCAATCCTGAGTAATGGTATTGGCTAGTTGTAGCTACCTAGTCGTTGGGGTTCGAGTCCTCTCTCAGGATTTTTTTCCACAAGCTACCTGTCAAAATATCTTACACCTACTTATTTTTAAAGTAGGTGTCTTTTTATTGACTTCTATTTACTTATGTGTTATATTTACTATATACTAAAAAAAAGGAATGATTATTAATGACTAAAAAAATTAAAAATATTGAAATTGTTTTTGAAAACTTAGATAGCGCAATGTTAGAACCAGAAAATGTAGAGTTGATACTAGAAGGCATTAGTGAAGAAAAAACTATGATATATGGAAATAGTGAAGTAGATACAAGTAAATCAGCAAAAAAAGTTTCTATTGAGGTAAGTGGTATGAAGGATGAATACTTTGAAGAGTTTCATGGTTTCTTAGATGAGCCCTACAACATGACATTATATGATAGACTAAGTGGCAAAGATATTGTTTGTGTTTGTTTGAATTATGAGGATGGTACAGACGATACTGTATATGTACCTTATCCTGAGTATGAGCAGTATAATTATATGCAGAGAAATAAGTACGAAAAAGAAATAGACACTTTATTTATTACAATAGAGGATAGAGAACAAGAAGACCATATACCAAACGATGAAAAACCTAACTTTAATGAAGGTGAAACAGAAGACCGCACGCTAGAAGGTTTAGTTAGTCAAGTAGAGGAATGGAGTAAAGATAAAGGATTGAACAATAACAACCCTGATAGACAAGCTCTTAAATTCTACGAAGAAGCAGGTGAAGTAGCATCGGCATTATCACGTGGTAACCTAGAAGCTCTTAAAGATGGTATTGGGGACACTGTAGTTACTTTAATTATTTTAGCTCAGCAACACGACATGTCATTACAAGAGTGTTTAGAGTTTGCTTATAATGAAATTAAAGGTCGTAAAGGAAGAACAGTTAATGGTACCTTTATTAAAGAGGAAGATTTAAATGAGTGATAACTTTAGTCAATTTATAAGTAAAAAAAGCAATGAATTAAACAAAGCTACGGAAAAACAAAAAGATTTTATTTATAAGCATATAGATTGTTTATATGATGAGTTTACTTTTGATATAGAGTCATTAAGTAAAGATGAAGCTACTAAACTTATAAATGATATAACTATAGAGTTAAGCTGTTCAGATGATTTTCTTGATTGGTATGATTATCAGTAAAGAATAAGCAGGTAAAGGTTTTGAAAGACCTTACCTGTTTTTTATATGTTATATTATTAGTGTATTACACAACAGAAAGGGATAACATTATGTCTAAAAAATTAAAGGTCTACAACAAAGAGGAACAGCTTATTTTAACTTCTGATGAAGTTACAGGTAGTTCTGTAAAAGTAACATTAACAGATTTAAAACCTAATACTACTTATAATAAAGGTGACTTTAAAGTCTCTTGGTTAGTCGATGGACAAGAATCTAATAAAACAGACGTGCCTAGTTTCAAAACATTAGAGAGTGAAAAAGAAGCTGTAGCTCAGCCTGTCATTGTAAACACACTAGATATGGGTACTGATGGATACACAATAAGTAATGAACCGCCTAAAAATACTAATAAGATATGGCTTAAATCAGAATAAGAAAGGATAACTCAGAATGGCAAACTTATTACCACATTTTTACAACACAGAAACAAATAAATGGGAAGAACTATATACAAAACCTATTGCTAGAGAAGTATTTAATATCATGAAAGAAGATTATTTAGCTCACAAAGGTGAAATAGGCTATTACATTGCTAAGTACAAAGATGGAGACACAAGTATTGAGCAACCTAATGTTGTTGTTTTTTATGATGTTAACGATTATGAAACAATGACTTTAAATAAAGAGGAAATGACAAGACTATTAAATGACTATATAGATAATAATTTACAAGGAAAGTTTAAACCCTTTTCTCTTACTAAATTCTTACAAAATTTAGAAGACCTTAATTACGCTTTACCAAAACAAGAAAAATTTCATGTAGATATAATCCAGTCGGATAAAAGAAAATTTTCGTTTCCTGATACAAATGCAATTAACACAAATCCGGATATCCTAGATGCCCTTACGGCTACGGATAATCATGTATATATGGAAGTAAAATATTTATACAATGGTCATCCTATTGATGATAAAAAATTAATAAAAGGAAACCAAGATTTAAAAAATTAATAACCCAGTAAAGAACCTGTAAAAAGGTTCTTTTTTTTTGCTTACTGAAAAAAGTGTATATTAGTAGTTGACATCCTAATGTTTATATGTTATAGTTAATTTAACTTAAAGAAAGGTTTGATAGATATGAATAAGATATATGCTATATATGTAGAAGAGGACTGTTATTATGATGAGGAACCCACCTCAAAAGTAATAGGATATACTACTAACATAGAAGAAGCTGAGTATGTTAAAAATAATTATGATGCATGGGGTAATACTATAAGGATAGGAGAAGTTAAAAGGCTTACAAAAGAAGTTCTTGATAAAGAACAGAAACTATATAAACTAATGTCACAGGTAATAATACAAAGAAAACAACATTATTTTAAACCTATACAAGAATTAAATACAATTGTAGATGAGGTATTTAATTCAAGTAAACCACATATTGACTTTAATGAGAAATGTAACATTAGTGTTTACTCACTAAATAAAAATCAAATTCAGGTAGTTGTAGGGTTGCTTTTCCCTACTAAGCCAACAGAAAAAGAAGTAGACAGTATCGTTAATGATGTAAAAAACAAAATTAACTTCATATTAAAAAACTGTGAAAATGCTGACATTAGAAAATCAAAAGAGATTGTGAAAATGATAGAAAAATTAAATAATTAGGAGATATAGAAATGAAAATAAAAACTAAAAAAGTAATGACGCTAGCCGAACTCATGGAATGGGCTTGGGAATATCCTGATTTAACAAAAGGAAAGAGAATTTACACAGAAAATCAAGATAATGAGAACTTTGTTTATTTTTCTTCGGAAGACGGAAGAAAATGTCTTGTTAGTGAATTTATATCAGCTGACGACACTTTTGAAGTCGAAGCTGAAGAGGAAATCACAGAAGAGGCTAAGGTTGATAGGTTGATTGAATTATTCGAGATTCAAGAAGGAGACTATAACTCTACACTATATGAGAACACTAGTATAAAAGAATGTTTATATGGCAGATGTGTGCCTACCAAAGCATTCTACATCTTAAACGATGACCTAACTATGACGTTAATCTGGAAAGATGGGGAGTTGGTAGAATGATGCAAACCTATAAAGTGAGTCTTTGTATTAAGTTCTTAGCGTTTAAATGTGATTATAAAATAAAAAAGCATTATTTTGTGCAAAGTACGAATGAGGAAGAAGCCAAAAATAGGACATTAAAACTGACTCGTAAAAAACTCCCATTCAAAACTGCAAGCATAGGGGTCGAAAAAGTGAAGGTAGCAGTATGACACTTAGGTTTAGAGCATGGAAAAAAGATGAGAAAATAATGTTAGAAGGTGGTAATTTTATTTTTTCTAAGGATATACAGTTACTACAATACACAGGACTTAAAGACAAAAACGGTACTAAAATATATGAGGGTGATATTATTGAGTTCGAAGATGAAGTGTTAGCAATACCAGGTGATTTTGAATCTGCAGTAGAAACAATTAACAGAGCAGTGATATCTATTGATGTTGTAAGTGGCATTCACTTAAAAGACTTTATGTTTGAGAGCGCAATCTCTGAAAATGATTACTTTGAGTATACAGACAAAAAATCTTTCCTTATGTACGACTGTGAGGTTAAAGGCAACGTATTTGAATCATCTCATTTATTGGAGGTAATAGAATGATACCGAAATTTAGAGCATGGGATAAAGAATCACAAAGAATGTTTAATATTGCTAGATTTGACTTTGCAGACCATACAGTATATTCACACCTATTTGCTTGTGATGGTTACTTAGGAGAAAACCTTGTAATTATGCAATCTACAGGACTTGAAGATAAGAATGGTACTGAAATATTTGAAGGTGATATACTTAGATATTGGGGGGATTGTAGACCTGTAATATTTAAAGAAGCTTCTTTTGGATGGGTTGAAGGGGGAGATTACATACCATTCTCTATGATGTGCATTTCAGAGATTGGTAATACTGAAGTTGTAGGAAATATCTATGAAAAAAGGAGTAAAAAAGAATGAAATATTACCAAGTAGAGCATGATAATTGTGAGCTATACGAAGACAGCTACTCTTATAGAGAAGATAAAATATATACTAGTCAAGAACAGCTTATTAAAGACATTAAATCTGAAGGATACAAAGAATTACAAGGCATGTCTAGAAATCATGATGGTATTGTTTACCTTAAACATATAGATGATTTTAGAGATGACATGATTACAATACATGAAATAGAAATCGTGGACAATAAATAAGGAGGTATTAAAAAATGTATACAAATGAATTTATTAAGAAGGTAAATCAGTTAGGATATGAAACCAGCCTCGCAAATAAAAATACTACCAAGAGAAAAGAAAAAATACTTATTAAAAAAGAAAACCAACAACCTATTGCTTGGGTATTTCTAAATGAACCATATTCTTTTCGAAGCTTAGGCACAGATAGTGAGTTATTTGATTTAATGGTAGAATATGCAAAAACACCTGTAAAAGAACGTAGTATAAGCAATATAGCAAAAGTAAAACCTCTAGACTTAGATACCCTTACAGATGATTATGCTAAAGTAAGAGAGTATATGCTAAAAGTCTTAATTGACATGGAATACGTAGTAGAATATATTCAATATACAGGCTATAATAAGAATGACATCAATCAGTGGACAGAAGGTCAGACATTTAGAGCAGTAGACAAACAAGGAAACAATAGCCTGTTTATTAATGCACCTTCAGGTATTGAAAAAGTTTTACATGGTAACTATATTATAAAAGATAAAAAGAAAGGTTTCGAACAAGTAGATAGAGAATTATTTGAATATAGATATGATATGTCACATTAAATACCTATTAATTTAGGTGTTTTTTATATTGTAAGAAATAGAGTAACACTACTACTATAATAGTAAAGGCAGTAGAGATAGACAGGACAATAATAACAGTAAAAGAAATCTTACCATGTTTACTTTAATAACAATAATAAAACTATGTTGACTTTTTATTATTATATACTTTATAATGTTGACTTTTAATAATAAGTTATATAATATTACTCACTACTAATAGTACATAGTATAACTAGTTATTAAAATGGTATACTAAAGAATACCATAGAAAACTATATATAAGGAAAGGCTCCTATATACTAAACTACTTATATGCTGTAATATACTAATACTCTAATTAAGTGTAAGGGAAGAGGGGGATATATTACTAACTTTATTGTAAAATGAATACAATTAGTTATTAGTAATGTTGACCTAGTTTAATAAAGTAATGGTTAATGTTGACTTTTAATAATAAGTTATATAATATTACTCACTAATTAGGTTCCTTAGGTAGCCCCATAGCCCTGTCAGACCCACCCACTTTAGTGGCATTTTACCCCTGCCCCCGTATAATATATTTATATTAACCTATTGTATACAATCCTAATAAATAATAAAAAAAAAGAAAGGGAGTTTATTCCCTTTCAATTTGTTTTACATCATTTCTATAGCTTCTGCTTTAATTTGTTCATAGTCTTTAATGTGTTTATTAAACTCTTCAACACGCATATGTTCCAATATATAATCTGCTAACTCAAACACTTTATTATCAACTAGTCTTATTGTTGTATCGTCTGTAAAGTCTAGGTTAGACGGTATATATTCTAATGGTGTTATGTCTTTATTCTCTTTTAATTGGTTTACAATATGAATGTATTTGCATAGTAAATCGTGTTCAGCAACATCTACCTCTATTGTTTCATAGATAGCTGTTAGTAATAAGTCAAATTCAATTCCTTCAAGTTCTGCTGTTTGTTCCATTTGGTTAAGTAATTTCATAGTTTATCAATCCCTTTTCTTTTATTTGTATTTCCTTAATTACATTATATCAAATATACAGTTAATTGCAATAGTTTTAGTTAATTATTTTGGGAAGTTTTACACTAATGATTATTCAGTAATTCTTTTATTACGTCTGGTGCTAGTGTTGTTATGTCATAGTCTTGTCTTAACTCATCTAAACTATTGTACTGTTTAATCGTTCCGCTGTCTTTGTCACTGCCTTTAATTGTTTGTTTGCTTACTGTTTCGTTAATAGCTTCACTGATATCAGTGAAGCTATTAACGTTGTCCATTATATCTATAAGTTCTTTATCAGATAAGTTCATGTGTAATGTCTCCTTAGAATAGCATTTGTTCTGCATTAAATTCTAGTGTTTCAATATCCATAATCATTTGTTCAAATTGTTCTTTGTTCATGTGGTTTAAGATAACGTTAGTAAAGTGTTCTGCTTTGTCTTGTGCTAATATAGCTCCCTCGTAAGTGCTATAATCAATGTTAGATGGTTTACGTTCTGCTTGTGTTAATGCTTCATTGTTTAATAACTGTTGTTCTAAGTG
