# Supplementary material for: Prolonged Disease Remission of the Chronic Immunological Skin Disorder Hidradenitis Suppurativa with Bacteriophage Therapy
Source: Research Square preprint supplement (doi:10.21203/rs.3.rs-5367237/v1), 2024-12-04
Supplement: Supplementary file 2 [file 59d1755e4e570b9ea40f8d71.xlsx]

## Sheet: S1
Supplementary Table S1: Treatment history of the patient
Date	Medicine type	Location	side-effects
15-05-2018	Deroofing	Groin & genitals
22-01-2019	Deroofing	Groin & genitals
10-01-2020	Deroofing	Groin & genitals
26-01-2021	Deroofing	Axilla, Groin & genitals
09-12-2021	Deroofing	Groin & genitals
06-03-2023	Deroofing	Groin & genitals
03-2018 - 06-2018	Tetracyclin (tetracyclines)	Oral	Gastro-intestinal
10-2018	Clarithomycin (macrolides)	Oral	Gastro-intestinal
10-2018	Azithromycin (macrolides)	Oral	Nausea
11-2018 - 01-2019	Clarithomycin (macrolides)	Oral
03-2019 - 06-2019	Clindamycin (lincosamides)	Oral
10-2019	Augmentin (amoxicillin + clavulanic acid; aminopenicillin)	Oral	Gastro-intestinal
11-2019 - 01-2020	Tetracyclin (tetracyclins)	Oral
05-2020	Clindamycin (lincosamides)	Oral	Gastro-intestinal
06-2020	Azithromycin (macrolides)	Oral	Gastro-intestinal
12-2020	Metronidazole (nitroimidazoles)	Oral
05-2021	Clindamycin (lincosamides)	Oral
04-2022	Clarithomycin (macrolides)	Oral
06-2022	Moxifloxacin (quinolones)	Oral
07-2018	Metformine (immunosuppressant)	Oral	Gastro-intestinal
10-2019	Neotigason (ritenoid)	Oral	Xerosis
11-2019	Neotigason (ritenoid)	Oral	Xerosis
11-2019	Zinc gluconate (immunosuppressant)	Oral
08-2021	Kenacort (steroid)	Intralesional
08-2021	Celestone (steroid)	Intralesional
11-2021	Celestone (steroid)	Intralesional
11-2021	Corticoid (steroid)	Ointment
07-2022	Spironolactone (androgen antagonist)	Oral	Gastro-intestinal
03-2023	Kenacort (steroid)	Intralesional
03-2023 - 06-2023	Celestone (steroid)	Intralesional
07-2023 - 08-2023	Celestone (steroid)	Intralesional
2013 - present (09-2024)	Adalimumab (biological)	Injection
06-2020 - 12-2023	Methotrexate (immunosuppressant)	Oral

## Sheet: S2
Supplementary Table S2: The efficiency of plating (EOP) of phage ISP, Remus, Romulus and Prima HS against S. aureus strains of other HS patients. Also the sequening type (ST) of the bacterium, Hurley stage of the patient and location from where the bacterium is isolated are shown.
Bacteria	ST	Hurley stage of patient	Location of isolation	ISP (host S. aureus ATCC6538)	Remus (host S. aureus PS47)	Romulus (host S. aureus PS47)	Prima HS (host S. aureus PS47)
Host	-	-	-	1.00	1.00	1.00	1.00
StaAu008	7	1	Buttocks	1.5 X 10-5	0	0.41	1.0
StaAu053	54	2	Axillary	1.5 X 10-5	0.14	0.10	7.1 X 10-2
StaAu067	5	2	Axillary	4.3 X 10-2	0	5.6 X 10-6	1.1 X 10-5
StaAu092	30	1	Abdomen.	0.41	0	5.6 X 10-6	1.1 X 10-5
StaAu102	99a2	3	Chest	1.5 X 10-4	0	5.6 X 10-6	1.1 X 10-4
StaAu131	7	2	Groin & genitals	1.8 X 10-2	0	0.39	1.2
StaAu190	15	1	Groin & genitals	7.6 X 10-2	4.5 X 10-2	0.21	1.1
StaAu191	7	1	Groin & genitals	1.5 X 10-5	0	0.82	1.1

## Sheet: S3
Supplementary Table S3: Serum levels of TNF-alpha in pg/mL. Four technical repeats are shown.
Sample	Repeat 1	Repeat 2	Repeat 2	Repeat 4	Average	Stdev
D1	14.9412	13.7647	16.1176	13.1765	14.5	1.12958
D2	12	13.7647	15.5294	10.8235	13.0294	1.78299
D3	13.7647	16.1176	13.1765	13.1765	14.0588	1.21268
D4	15.5294	14.9559	13.1765	12	13.9154	1.40556
W2	12	11.4118	13.1765	10.2353	11.7059	1.06046
W3	16.1176	16.7059	18.4706	18.4706	17.4412	1.05021
W6	16.7059	16.1176	15.5294	13.7647	15.5294	1.10049
W10	12	12.5882	12.7794	9.05882	11.6066	1.49875
W11	14.9412	13.7647	12	10.8235	12.8824	1.58387
				TOTAL	13.8521	1.74569

## Sheet: S4
Supplementary Table S4: Efficiency of plating (EOP) and antibiotic susceptibility of S. aureus strains isolated from the patient at different timepoints and locations.
Strain	Date	Location	Antibiotic resistance	Antibiotic intermediate	Antibiotic sensitive	EOP of Prima compared to host strain StaAu008
StaAu009	26-01-2021	Axilla	fusidic acid	levofloxacin	oxacillin, gentamicin, tobramycin, erythromycin, clindamycin	0.94
StaAu035	04-5-2021	Axilla	fusidic acid	levofloxacin	oxacillin, gentamicin, tobramycin, erythromycin, clindamycin	1.2
StaAu121	30-11-2021	Groin & genitals	fusidic acid	levofloxacin	oxacillin, gentamicin, tobramycin, erythromycin, clindamycin	1.2
StaAu120	30-11-2021	Axilla	fusidic acid	levofloxacin	oxacillin, gentamicin, tobramycin, erythromycin, clindamycin	1.0
IS1	18-09-2023	Axilla	fusidic acid	levofloxacin	oxacillin, gentamicin, tobramycin, erythromycin, clindamycin	1.4
IS2	18-09-2023	Pubis (IL)	fusidic acid	levofloxacin	oxacillin, gentamicin, tobramycin, erythromycin, clindamycin	0.7
IS3	18-09-2023	Pubis (deroofed)	fusidic acid	levofloxacin	oxacillin, gentamicin, tobramycin, erythromycin, clindamycin	2.2
IS4	25-09-2023	Pubis	fusidic acid	levofloxacin	oxacillin, gentamicin, tobramycin, erythromycin, clindamycin	1.0
IS5	27-11-2023	Pubis	fusidic acid	levofloxacin	oxacillin, gentamicin, tobramycin, erythromycin, clindamycin	1.3
